# Supplementary material for: Electrochemical dehydrogenative annulation for the synthesis of 4-oxo-oxazolines
Source: Royal Society of Chemistry journal article supplement (doi:10.1039/d4gc05119j), 2024-12-02

## **Electrochemical dehydrogenative annulation for the synthesis of 4-oxo-oxazolines**

Yong Yuan,\* Xincong Liu, Feng Zhang, Chunyan Bai, Yuyan Tao, Xiazhen Bao,  
Dongsheng Ji, and Congde Huo

College of Chemistry and Chemical Engineering, Northwest Normal University,  
Lanzhou, Gansu 730070, China

\*Email: [yuanyong@nwnu.edu.cn](mailto:yuanyong@nwnu.edu.cn)

### **Table of Contents**

|                                              |           |
|----------------------------------------------|-----------|
| <b>1. General Information</b> .....          | <b>02</b> |
| <b>2. Experimental Details</b> .....         | <b>06</b> |
| <b>3. Mechanistic Investigations</b> .....   | <b>11</b> |
| <b>4. Characterization of Products</b> ..... | <b>26</b> |
| <b>5. References</b> .....                   | <b>27</b> |
| <b>6. NMR Spectra of Products</b> .....      | <b>70</b> |

## 1. General Information

All glassware was oven dried at 110 °C for hours and cooled down under vacuum. Unless otherwise noted, materials were obtained from commercial suppliers and used without further purification. Flash column chromatography was performed with silica gel (200 - 300 mesh). Cyclic voltammograms were recorded on a CHI 660E potentiostat.  $^1\text{H}$  NMR,  $^{13}\text{C}$  NMR, and  $^{19}\text{F}$  NMR experiments were carried out using Vnmr Mercury plus 400 MHz or Agilent DD2-600 MHz spectrometers. All chemical shifts ( $\delta$ ) are reported in ppm relative to internal tetramethyl silane (TMS, 0 ppm) for  $^1\text{H}$ ,  $\text{CDCl}_3$  (77.16 ppm) or  $\text{DMSO-}d_6$  (39.52 ppm) for  $^{13}\text{C}$ . The abbreviations used for explaining the multiplicities were as follows: s = singlet, d = doublet, t = triplet, q = quartet, m = multiplet, br = broad. Coupling constants ( $J$ ) are reported in Hz. High-resolution mass spectra (HRMS) spectra were obtained from the Thermo Fisher Q-Exactive mass spectrometer in electrospray ionization ( $\text{ESI}^+$ ) mode. X-ray crystallographic analyses were performed on a Rigaku XtaL AB Synergy-DW diffractometer.

## 2. Experimental Details

### 2.1 General procedure for the synthesis of enamides<sup>1</sup>

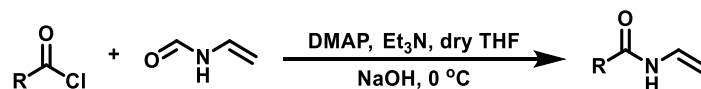

An oven-dried 100 mL two-neck glass tube was equipped with a stir bar was charged with freshly distilled *N*-vinylformamide (10 mmol) and dry THF (40 mL) under an argon atmosphere. Triethylamine (1.4 equiv., 1.9 mL) was added via syringe and the reaction mixture was then cooled to 0 °C. The corresponding acyl chloride (1.2 equiv.) was added dropwise via syringe followed by the slow addition of 4-dimethylamino pyridine (10 mol%, 0.12 g). The reaction was warmed to room temperature and let stir until the reaction was completed by TLC monitoring. After the reaction was cooled to 0 °C, 5 N NaOH was added. The reaction mixture was next stirred vigorously at room temperature until complete consumption of the imide (TLC). The reaction mixture was diluted with water (30 mL) and extracted with EtOAc (30 mL × 3). The combined organic layers were dried (Na<sub>2</sub>SO<sub>4</sub>), filtered, and concentrated. Target product was finally purified by flash column chromatography on silica gel (petroleum ether : ethyl acetate = 15:1 to 10:1).

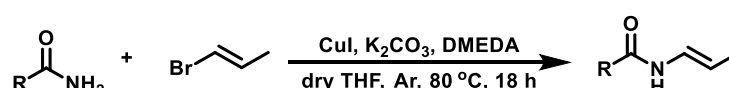

An oven-dried 100 mL two-neck glass tube was equipped with a stir bar was charged with freshly distilled (E)-1-bromoprop-1-ene (10 mmol, 1.2 g) and dry THF (40 mL) under an argon atmosphere. CuI (10% mol, 0.2 g), DMEDA (40 mol%, 0.35 g) and K<sub>2</sub>CO<sub>3</sub> (2 equiv., 2.76 g) were added via syringe and the reaction mixture was then heat up to 80 °C. The corresponding amide (1.2 equiv.) was added dropwise via syringe. The reaction was warmed 18 h and let stir until the reaction was completed by TLC monitoring. The reaction mixture was diluted with water (30 mL) and extracted with EtOAc (30 mL × 3). The combined organic layers were dried (Na<sub>2</sub>SO<sub>4</sub>), filtered, and concentrated. Target product was finally purified by flash column chromatography

on silica gel (petroleum ether : ethyl acetate = 15:1 to 10:1).

## 2.2 General procedure for the electrochemical dehydrogenative annulation for the synthesis of 4-hydroxy substituted oxazolines

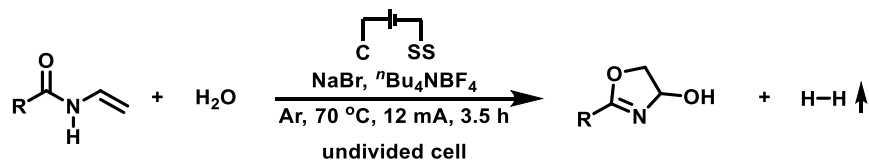

In an oven-dried undivided three-necked bottle (25 mL) equipped with a stir bar, enamides (0.5 mmol), water (1.5 mL), NaBr (1.0 mmol, 2.0 equiv., 102 mg) and  $t\text{Bu}_4\text{NBF}_4$  (0.5 mmol, 1.0 equiv., 165 mg) were combined and added. The bottle was equipped with a carbon cloth (15 mm  $\times$  15 mm  $\times$  0.33 mm) anode and a stainless steel plate (15 mm  $\times$  15 mm  $\times$  1 mm) cathode and was then charged with argon. Under the protection of argon, MeCN (10.5 mL) was injected into the tubes via syringes. The reaction mixture was stirred and electrolyzed at a constant current of 12 mA at 70 °C for 3.5 h. After the reaction was completed, the reaction mixture was concentrated under reduced pressure. The pure product was obtained by flash column chromatography on silica gel (petroleum ether : ethyl acetate = 2:1 to 1:1).

## 2.3 General procedure for the electrochemical dehydrogenative annulation for the synthesis of 4-alkoxy substituted oxazolines

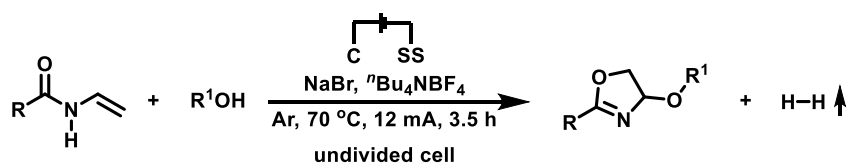

In an oven-dried undivided three-necked bottle (25 mL) equipped with a stir bar, enamides (0.5 mmol), alcohols (0.5 mL), NaBr (1.0 mmol, 2.0 equiv., 102 mg) and  $t\text{Bu}_4\text{NBF}_4$  (0.5 mmol, 1.0 equiv., 165 mg) were combined and added. The bottle was equipped with a carbon cloth (15 mm  $\times$  15 mm  $\times$  0.33 mm) anode and a stainless steel plate (15 mm  $\times$  15 mm  $\times$  1 mm) cathode and was then charged with argon. Under the protection of argon, MeCN (10.5 mL) was injected into the tubes via syringes. The

reaction mixture was stirred and electrolyzed at a constant current of 12 mA at 70 °C for 3.5 h. After the reaction was completed, the reaction mixture was concentrated under reduced pressure. The pure product was obtained by flash column chromatography on silica gel (petroleum ether : ethyl acetate = 10:1 to 4:1).

## 2.4 General procedure for the electrochemical dehydrogenative annulation for the synthesis of 4- acyloxy substituted oxazolines

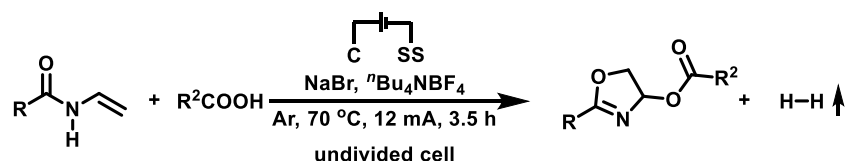

In an oven-dried undivided three-necked bottle (25 mL) equipped with a stir bar, enamides (0.5 mmol), acids (2 equiv.), NaBr (1.0 mmol, 2.0 equiv., 102 mg) and  $t\text{Bu}_4\text{NBF}_4$  (0.5 mmol, 1.0 equiv., 165 mg) were combined and added. The bottle was equipped with a carbon cloth (15 mm × 15 mm × 0.33 mm) anode and a stainless steel plate (15 mm × 15 mm × 1 mm) cathode and was then charged with argon. Under the protection of argon, MeCN (10.5 mL) was injected into the tubes via syringes. The reaction mixture was stirred and electrolyzed at a constant current of 12 mA at 70 °C for 3.5 h. After the reaction was completed, the reaction mixture was concentrated under reduced pressure. The pure product was obtained by flash column chromatography on silica gel (petroleum ether : ethyl acetate = 10:1 to 4:1).

## 2.5 The experimental setup for electrolysis

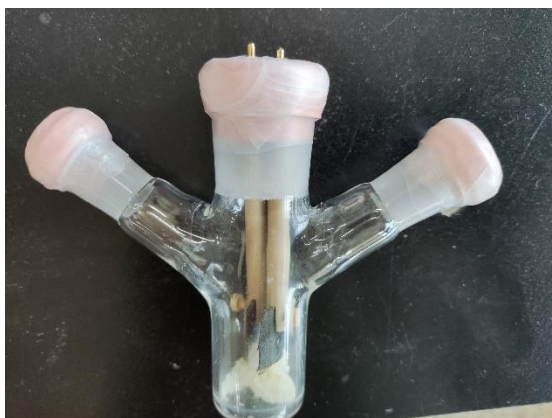

## 2.6 Procedure for the gram scale synthesis of 2a

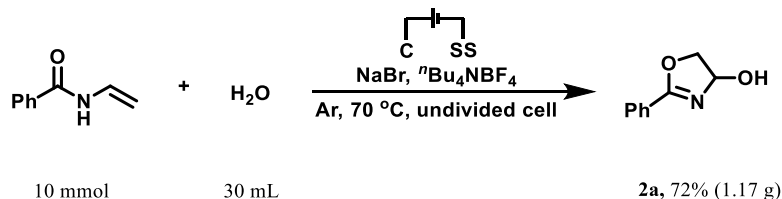

In an oven-dried undivided three-necked bottle equipped with a stir bar, N-vinylbenzamide (10.0 mmol, 1.5 g), water (30 mL), NaBr (10.0 mmol, 1.0 equiv., 2.1 g) and  $t\text{Bu}_4\text{NBF}_4$  (1.0 mmol, 0.1 equiv., 0.33 g) were combined and added. The bottle was equipped with two carbon cloths (15 mm  $\times$  30 mm  $\times$  0.33 mm) as the anodes and two stainless steel plates (15 mm  $\times$  30 mm  $\times$  1 mm) as the cathodes and was then charged with argon. Under the protection of argon, MeCN (80 mL) was injected into the tubes via syringes. The reaction mixture was stirred and electrolyzed at a constant current of 48 mA at 70 °C for 8.75 h. After the reaction was completed, the reaction mixture was concentrated under reduced pressure. The pure product was obtained by flash column chromatography on silica gel (petroleum ether : ethyl acetate = 1:1) with 72% as a white solid.

### 3. Mechanistic Investigations

#### 3.1 Cyclic voltammetry study

Cyclic voltammetry (CV) experiments were conducted in an electrolyte of  $n\text{Bu}_4\text{NPF}_6$  (0.01 M) in MeCN and  $\text{H}_2\text{O}$  using a glassy carbon disk working electrode (diameter, 1 mm), a Pt wire auxiliary electrode and a Ag/AgCl reference electrode. The scan rate is 100 mV/s.

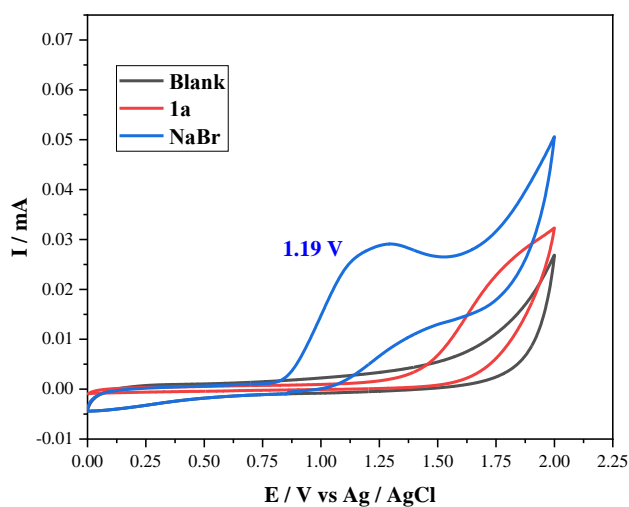

Fig. S1. Cyclic voltammogram of **1a**, **NaBr**, and their mixture in MeCN and  $\text{H}_2\text{O}$ . Conditions:  $n\text{Bu}_4\text{NPF}_6$  (0.1 M in MeCN), and with (a) **1a** (2.0 mM), (b) **NaBr** (2.0 mM), or. Scan rate: 100 mV/s.

#### 3.2 Radical trapping by TEMPO

In an oven-dried undivided three-necked bottle (25 mL) equipped with a stir bar, N-vinylbenzamide (0.5 mmol, 1.0 equiv., 73 mg), water (1.5 mL), NaBr (1.0 mmol, 2.0 equiv., 102 mg) and 2,2,6,6-tetramethyl-1-piperidinyloxy (TEMPO) (1.0 mmol, 2.0 equiv., 156 mg) were combined and added. The bottle was equipped with a carbon cloth (15 mm  $\times$  15 mm  $\times$  0.33 mm) anode and a stainless steel plate (15 mm  $\times$  15 mm  $\times$  1 mm) cathode and was then charged with argon. Under the protection of argon, MeCN (11.5 mL) was injected into the tubes via syringes. The reaction mixture was stirred and electrolyzed at a constant current of 12 mA at 70  $^\circ\text{C}$  for 3.5 h. After the reaction was

completed, the reaction mixture was concentrated under reduced pressure. Pure product obtained by silica gel rapid column chromatography with a yield of 30%. Other intermediate products were detected by HRMS analysis of the reaction mixture.

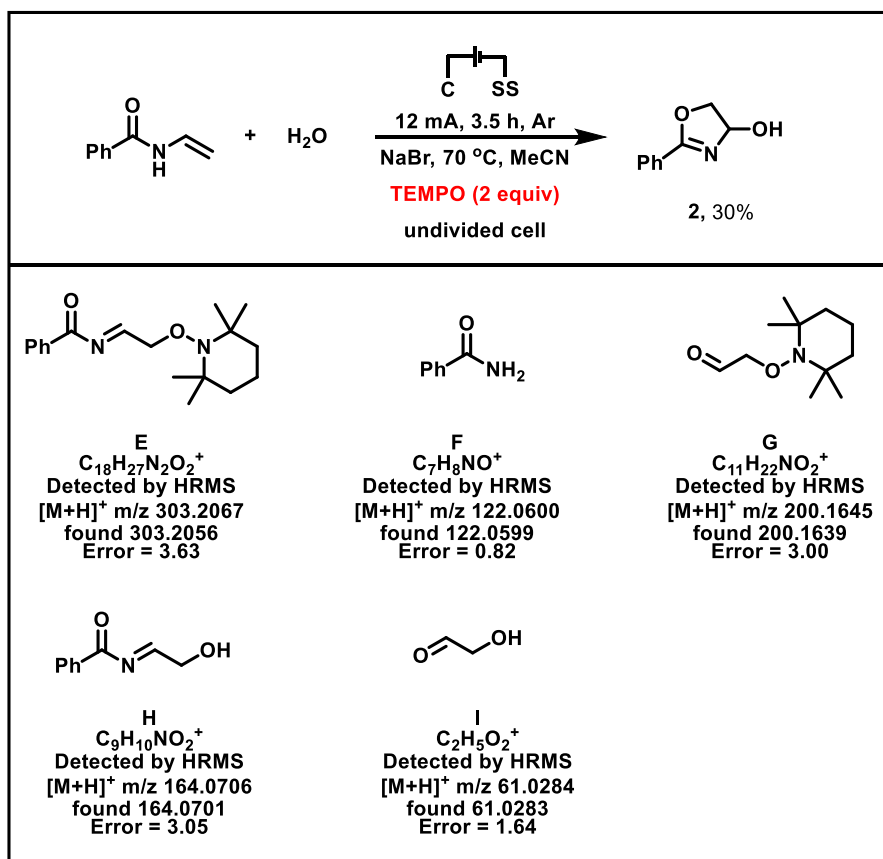



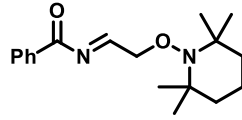

**E**  
**C<sub>18</sub>H<sub>27</sub>N<sub>2</sub>O<sub>2</sub><sup>+</sup>**  
**Detected by HRMS**  
**[M+H]<sup>+</sup> m/z 303.2067**  
**found 303.2056**  
**Error = 3.63**

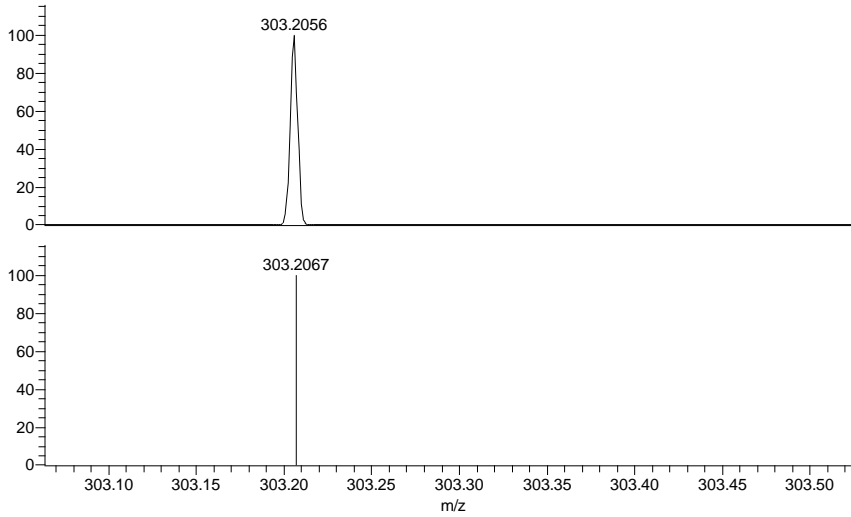

NL:  
3.84E7  
LIUXINCONG-Q7  
(1)#1 RT: 0.00 AV:  
1 T: FTMS + p ESI  
Full ms  
[50.0000-750.0000]

NL:  
8.11E5  
C<sub>18</sub>H<sub>26</sub>N<sub>2</sub>O<sub>2</sub>+H:  
C<sub>18</sub>H<sub>27</sub>N<sub>2</sub>O<sub>2</sub>  
pa Chrg 1

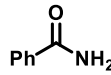

**F**  
**C<sub>7</sub>H<sub>8</sub>NO<sup>+</sup>**  
**Detected by HRMS**  
**[M+H]<sup>+</sup> m/z 122.0600**  
**found 122.0599**  
**Error = 0.82**

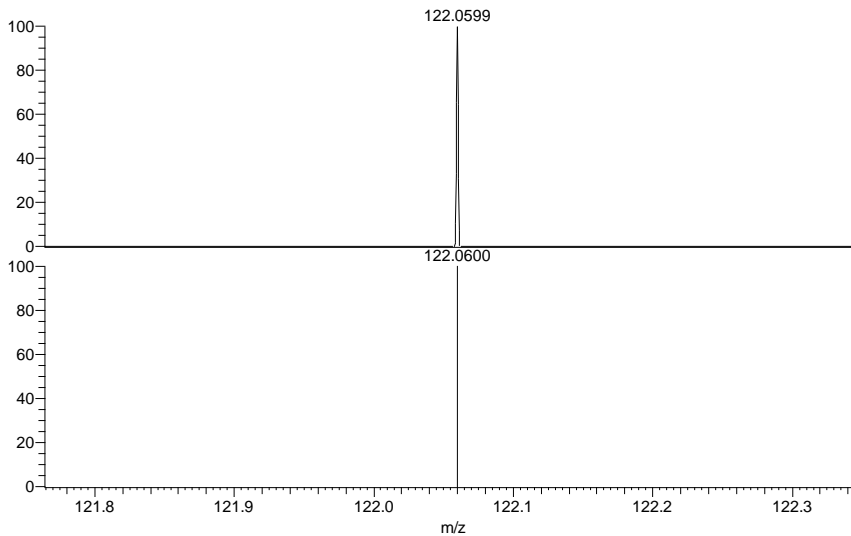

NL:  
2.44E7  
LIUXINCONG-Q7  
(1)#1 RT: 0.00 AV:  
1 T: FTMS + p ESI  
Full ms  
[50.0000-750.0000]

NL:  
9.21E5  
C<sub>7</sub>H<sub>7</sub>NO+H:  
C<sub>7</sub>H<sub>8</sub>N<sub>1</sub>O<sub>1</sub>  
pa Chrg 1

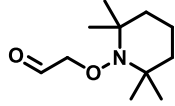

**G**  
 $C_{11}H_{22}NO_2^+$   
Detected by HRMS  
[M+H]<sup>+</sup> m/z 200.1645  
found 200.1639  
Error = 3.00

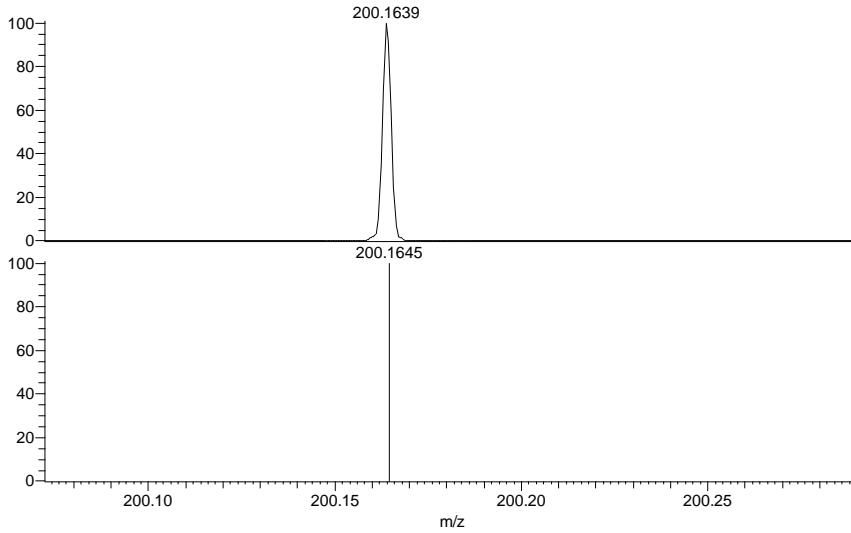

NL:  
9.71E8  
LIUXINCONG-Q7  
(1)#59 RT: 0.26  
AV: 1 T: FTMS + p  
ESI Full ms  
[50.0000-750.0000]

NL:  
8.79E5  
 $C_{11}H_{21}NO_2 + H:$   
 $C_{11}H_{22}N_1O_2$   
pa Chrg 1

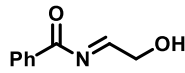

**H**  
 $C_9H_{10}NO_2^+$   
Detected by HRMS  
[M+H]<sup>+</sup> m/z 164.0706  
found 164.0701  
Error = 3.05

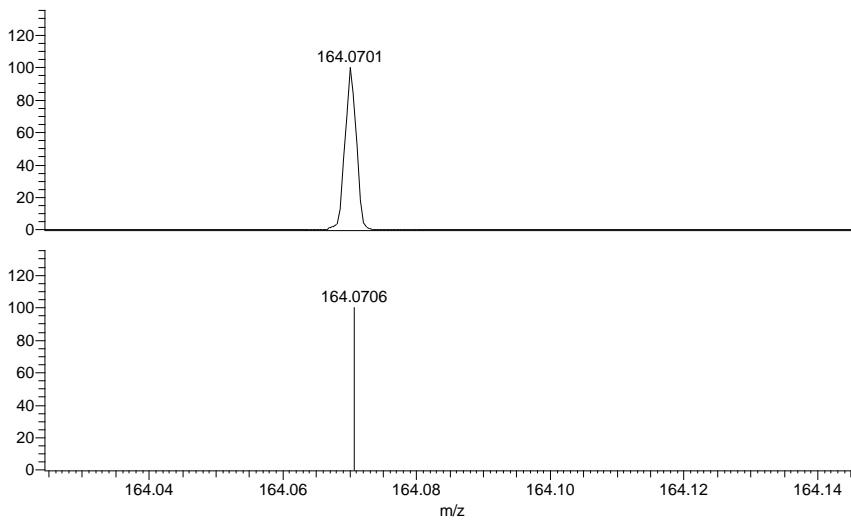

NL:  
9.81E8  
LIUXINCONG-Q7  
(1)#59 RT: 0.26  
AV: 1 T: FTMS + p  
ESI Full ms  
[50.0000-750.0000]

NL:  
8.99E5  
 $C_9H_9NO_2 + H:$   
 $C_9H_{10}N_1O_2$   
pa Chrg 1

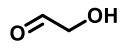

$C_2H_5O_2^+$   
Detected by HRMS  
[M+H]<sup>+</sup> m/z 61.0284  
found 61.0283  
Error = 1.64

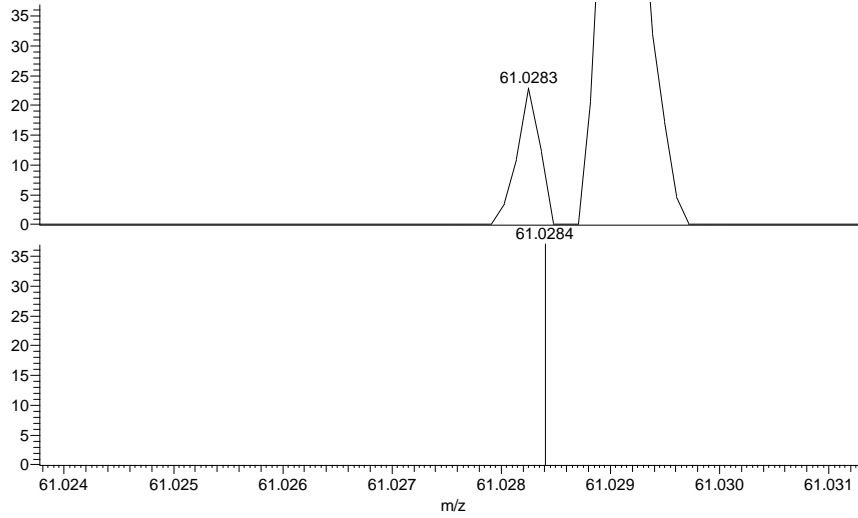

NL:  
8.57E6  
LIUXINCONG-Q7  
(1)#62 RT: 0.28  
AV: 1 T: FTMS + p  
ESI Full ms  
[50.0000-750.0000]

NL:  
9.73E5  
 $C_2H_4O_2 + H$ :  
 $C_2H_5O_2$   
pa Chrg 1

#### 4. Characterization of the products

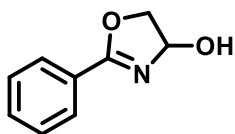

**2-Phenyl-4,5-dihydrooxazol-4-ol (2a).** The desired pure product was obtained in 89% yield (73 mg) as a white solid. M.P. = 88 °C - 90 °C.  $^1\text{H}$  NMR (400 MHz, DMSO- $d_6$ )  $\delta$  7.90 (d,  $J$  = 6.4 Hz, 2H), 7.55 - 7.53 (m, 1H), 7.48 - 7.45 (m, 2H), 6.18 (s, 1H), 5.74 - 5.73 (m, 1H), 4.40 - 4.04 (m, 2H).  $^{13}\text{C}$  NMR (151 MHz, DMSO- $d_6$ )  $\delta$  164.3, 132.2, 129.1, 128.5, 127.8, 90.0, 74.4. HRMS (ESI)  $m/z$ :  $[\text{M} + \text{H}]^+$  calcd for  $\text{C}_9\text{H}_{10}\text{NO}_2$  164.0706; found 164.0706.

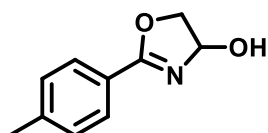

**2-(*p*-Tolyl)-4,5-dihydrooxazol-4-ol (2b).** The desired pure product was obtained in 78% yield (69 mg) as a white solid. M.P. = 103 °C - 105 °C.  $^1\text{H}$  NMR (400 MHz,  $\text{CDCl}_3$ )  $\delta$  7.84 (d,  $J$  = 8.2 Hz, 2H), 7.22 (d,  $J$  = 8.0 Hz, 2H), 6.01 (dd,  $J$  = 7.0, 4.4 Hz, 1H), 4.47 - 4.33 (m, 2H), 2.38 (s, 3H).  $^{13}\text{C}$  NMR (151 MHz,  $\text{CDCl}_3$ )  $\delta$  166.8, 142.7, 129.2, 128.6, 124.0, 89.2, 74.2, 21.6. HRMS (ESI)  $m/z$ :  $[\text{M} + \text{H}]^+$  calcd for  $\text{C}_{10}\text{H}_{12}\text{NO}_2$  178.0863; found 178.0862.

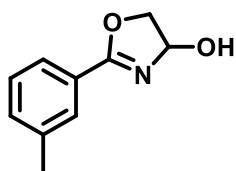

**2-(*m*-Tolyl)-4,5-dihydrooxazol-4-ol (2c).** The desired pure product was obtained in 71% yield (63 mg) as a white solid. M.P. = 107 °C - 109 °C.  $^1\text{H}$  NMR (600 MHz,  $\text{CDCl}_3$ )  $\delta$  7.77 (s, 2H), 7.32 - 7.30 (m, 2H), 6.02 (dd,  $J$  = 7.0, 4.4 Hz, 1H), 4.47 - 4.34 (m, 2H), 2.39 (s, 3H).  $^{13}\text{C}$  NMR (151 MHz,  $\text{CDCl}_3$ )  $\delta$  166.9, 138.2, 132.9, 129.2, 128.4, 126.8,

125.8, 89.3, 74.2, 21.3. HRMS (ESI)  $m/z$ :  $[M + H]^+$  calcd for  $C_{10}H_{12}NO_2$  178.0863; found 178.0862.

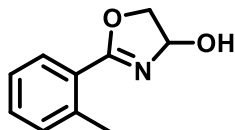

**2-(*o*-Tolyl)-4,5-dihydrooxazol-4-ol (2d).** The desired pure product was obtained in 74% yield (66 mg) as a white solid. M.P. = 117 °C - 119 °C.  $^1H$  NMR (600 MHz,  $CDCl_3$ )  $\delta$  7.80 (d,  $J = 7.4$  Hz, 1H), 7.36 (t,  $J = 7.5$  Hz, 1H), 7.24 (d,  $J = 7.4$  Hz, 2H), 5.99 (dd,  $J = 7.1, 4.5$  Hz, 1H), 4.42 - 4.27 (m, 2H), 2.57 (s, 3H).  $^{13}C$  NMR (151 MHz,  $CDCl_3$ )  $\delta$  167.7, 138.8, 131.3, 131.2, 130.1, 126.5, 125.7, 89.5, 73.6, 21.5. HRMS (ESI)  $m/z$ :  $[M + H]^+$  calcd for  $C_{10}H_{12}NO_2$  178.0863; found 178.0860.

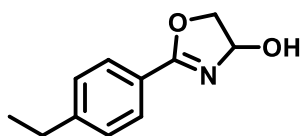

**2-(4-Ethylphenyl)-4,5-dihydrooxazol-4-ol (2e).** The desired pure product was obtained in 85% yield (82 mg) as a white solid. M.P. = 93 °C - 95 °C.  $^1H$  NMR (400 MHz,  $CDCl_3$ )  $\delta$  7.87 (d,  $J = 8.0$  Hz, 2H), 7.25 (d,  $J = 7.7$  Hz, 2H), 6.03 - 6.00 (m, 1H), 4.48 - 4.34 (m, 2H), 2.68 (dd,  $J = 15.1, 7.6$  Hz, 2H), 1.23 (t,  $J = 7.6$  Hz, 3H).  $^{13}C$  NMR (151 MHz,  $CDCl_3$ )  $\delta$  166.9, 148.9, 128.7, 128.0, 124.2, 89.3, 74.2, 28.9, 15.2. HRMS (ESI)  $m/z$ :  $[M + H]^+$  calcd for  $C_{11}H_{14}NO_2$  192.1019; found 192.1019.

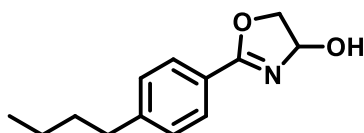

**2-(4-Butylphenyl)-4,5-dihydrooxazol-4-ol (2f).** The desired pure product was obtained in 96% yield (112 mg) as a white solid. M.P. = 115 °C - 117 °C.  $^1H$  NMR (400 MHz,  $CDCl_3$ )  $\delta$  7.87 (d,  $J = 8.3$  Hz, 2H), 7.23 (d,  $J = 7.9$  Hz, 2H), 6.01 (dd,  $J = 7.0, 4.3$  Hz, 1H), 4.48 - 4.33 (m, 2H), 2.65 (t,  $J = 7.7$  Hz, 2H), 1.64 - 1.56 (m, 2H), 1.40 - 1.30 (m, 2H), 0.92 (t,  $J = 7.3$  Hz, 3H).  $^{13}C$  NMR (151 MHz,  $CDCl_3$ )  $\delta$  166.9, 147.6, 128.6,

128.6, 124.2, 89.2, 74.2, 35.6, 33.2, 22.3, 13.9. HRMS (ESI)  $m/z$ :  $[M + H]^+$  calcd for  $C_{13}H_{18}NO_2$  220.1332; found 220.1333.

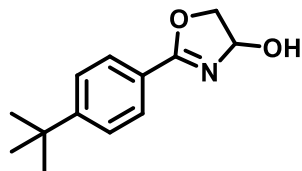

**2-(4-(*tert*-Butyl) phenyl)-4,5-dihydrooxazol-4-ol (2g).** The desired pure product was obtained in 84% yield (92 mg) as a white solid. M.P. = 110 °C - 112 °C.  $^1H$  NMR (400 MHz,  $CDCl_3$ )  $\delta$  7.89 (d,  $J$  = 8.4 Hz, 2H), 7.45 (d,  $J$  = 8.3 Hz, 2H), 6.02 (dd,  $J$  = 7.1, 4.4 Hz, 1H), 4.48 - 4.34 (m, 2H), 1.32 (s, 9H).  $^{13}C$  NMR (151 MHz,  $CDCl_3$ )  $\delta$  166.8, 155.7, 128.5, 125.5, 124.0, 89.2, 74.2, 35.0, 31.1. HRMS (ESI)  $m/z$ :  $[M + H]^+$  calcd for  $C_{13}H_{18}NO_2$  220.1332; found 220.1331.

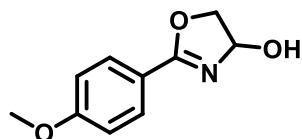

**2-(4-Methoxyphenyl)-4,5-dihydrooxazol-4-ol (2h).** The desired pure product was obtained in 66% yield (63 mg) as a white solid. M.P. = 128 °C - 130 °C.  $^1H$  NMR (400 MHz,  $CDCl_3$ )  $\delta$  7.89 (d,  $J$  = 8.8 Hz, 2H), 6.91 (d,  $J$  = 8.8 Hz, 2H), 5.99 (dd,  $J$  = 7.0, 4.3 Hz, 1H), 4.46 - 4.31 (m, 2H), 3.82 (s, 3H).  $^{13}C$  NMR (151 MHz,  $CDCl_3$ )  $\delta$  166.5, 162.7, 130.5, 119.2, 113.9, 89.2, 74.2, 55.3. HRMS (ESI)  $m/z$ :  $[M + H]^+$  calcd for  $C_{10}H_{12}NO_3$  194.0812; found 194.0813.

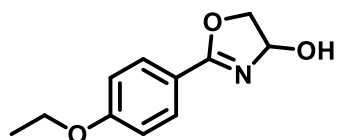

**2-(4-Ethoxyphenyl)-4,5-dihydrooxazol-4-ol (2i).** The desired pure product was obtained in 87% yield (90 mg) as a white solid. M.P. = 143 °C - 145 °C.  $^1H$  NMR (400 MHz,  $CDCl_3$ )  $\delta$  7.90 (d,  $J$  = 8.8 Hz, 2H), 6.91 (d,  $J$  = 8.8 Hz, 2H), 6.01 (dd,  $J$  = 6.9, 4.3 Hz, 1H), 4.48 - 4.33 (m, 2H), 4.06 (q,  $J$  = 7.0 Hz, 2H), 1.42 (t,  $J$  = 7.0 Hz, 3H).  $^{13}C$

NMR (151 MHz, CDCl<sub>3</sub>)  $\delta$  166.6, 162.1, 130.5, 119.0, 114.3, 89.3, 74.2, 63.6, 14.7.  
HRMS (ESI) m/z: [M + H]<sup>+</sup> calcd for C<sub>11</sub>H<sub>14</sub>NO<sub>3</sub> 208.0968; found 208.0968.

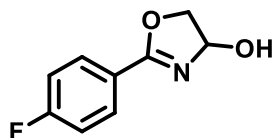

**2-(4-Fluorophenyl)-4,5-dihydrooxazol-4-ol (2j).** The desired pure product was obtained in 80% yield (73 mg) as a white solid. M.P. = 127 °C - 129 °C. <sup>1</sup>H NMR (400 MHz, CDCl<sub>3</sub>)  $\delta$  7.99 - 7.96 (m, 2H), 7.14 - 7.09 (m, 2H), 6.01 (dd, *J* = 7.0, 4.3 Hz, 1H), 4.51 - 4.34 (m, 2H). <sup>13</sup>C NMR (151 MHz, CDCl<sub>3</sub>)  $\delta$  165.9, 131.1 (d, *J* = 15.1 Hz), 115.8 (d, *J* = 15.1 Hz), 89.4, 74.4. <sup>19</sup>F NMR (376 MHz, CDCl<sub>3</sub>)  $\delta$  -106.47. HRMS (ESI) m/z: [M + H]<sup>+</sup> calcd for C<sub>9</sub>H<sub>9</sub>FNO<sub>2</sub> 182.0612; found 182.0611.

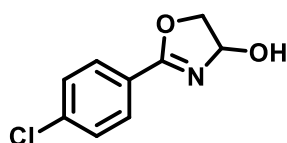

**2-(4-Chlorophenyl)-4,5-dihydrooxazol-4-ol (2k).** The desired pure product was obtained in 78% yield (77 mg) as a white solid. M.P. = 112 °C - 114 °C. <sup>1</sup>H NMR (400 MHz, CDCl<sub>3</sub>)  $\delta$  7.91 (d, *J* = 8.5 Hz, 2H), 7.42 (d, *J* = 8.5 Hz, 2H), 6.00 (dd, *J* = 6.9, 4.4 Hz, 1H), 4.51 - 4.34 (m, 2H). <sup>13</sup>C NMR (151 MHz, CDCl<sub>3</sub>)  $\delta$  166.0, 138.5, 130.0, 128.8, 125.4, 89.7, 74.4. HRMS (ESI) m/z: [M + H]<sup>+</sup> calcd for C<sub>9</sub>H<sub>9</sub>ClNO<sub>2</sub> 198.0316; found 198.0317.

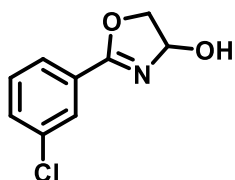

**2-(3-Chlorophenyl)-4,5-dihydrooxazol-4-ol (2l).** The desired pure product was obtained in 68% yield (67 mg) as a white solid. M.P. = 114 °C - 116 °C. <sup>1</sup>H NMR (400 MHz, CDCl<sub>3</sub>)  $\delta$  7.94 (s, 1H), 7.86 (d, *J* = 7.8 Hz, 1H), 7.51 - 7.48 (m, 1H), 7.40 - 7.36 (m, 1H), 6.01 (dd, *J* = 7.0, 4.4 Hz, 1H), 4.52 - 4.35 (m, 2H). <sup>13</sup>C NMR (151 MHz,

CDCl<sub>3</sub>)  $\delta$  165.7, 132.2, 129.8, 128.7, 127.7, 126.8, 125.4, 89.5, 74.4. HRMS (ESI)  $m/z$ : [M + H]<sup>+</sup> calcd for C<sub>9</sub>H<sub>10</sub>ClNO<sub>2</sub> 198.0316; found 198.0314.

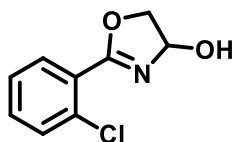

**2-(2-Chlorophenyl)-4,5-dihydrooxazol-4-ol (2m).** The desired pure product was obtained in 72% yield (71 mg) as a white solid. M.P. = 105 °C - 106 °C. <sup>1</sup>H NMR (400 MHz, CDCl<sub>3</sub>)  $\delta$  7.82 - 7.79 (m, 1H), 7.48 - 7.39 (m, 2H), 7.35 - 7.31 (m, 1H), 6.05 (dd,  $J$  = 7.2, 4.5 Hz, 1H), 4.49 - 4.31 (m, 2H). <sup>13</sup>C NMR (151 MHz, CDCl<sub>3</sub>)  $\delta$  165.3, 133.6, 132.2, 131.4, 130.9, 126.7, 126.6, 89.7, 73.9. HRMS (ESI)  $m/z$ : [M + H]<sup>+</sup> calcd for C<sub>9</sub>H<sub>10</sub>ClNO<sub>2</sub> 198.0316; found 198.0316.

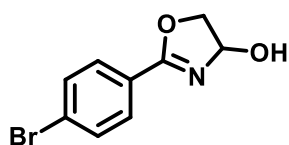

**2-(4-Bromophenyl)-4,5-dihydrooxazol-4-ol (2n).** The desired pure product was obtained in 82% yield (99 mg) as a white solid. M.P. = 152 °C - 154 °C. <sup>1</sup>H NMR (400 MHz, DMSO-*d*<sub>6</sub>)  $\delta$  7.81 (d,  $J$  = 8.6 Hz, 2H), 7.69 (d,  $J$  = 8.6 Hz, 2H), 6.20 - 6.19 (m, 1H), 5.75 - 5.70 (m, 1H), 4.42 - 4.02 (m, 2H). <sup>13</sup>C NMR (151 MHz, DMSO-*d*<sub>6</sub>)  $\delta$  163.6, 132.3, 130.5, 127.0, 126.0, 90.0, 74.6. HRMS (ESI)  $m/z$ : [M + H]<sup>+</sup> calcd for C<sub>9</sub>H<sub>9</sub>BrNO<sub>2</sub> 241.9811; found 241.9812.

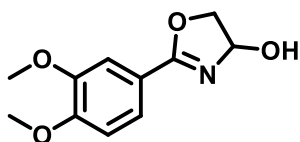

**2-(3,4-Dimethoxyphenyl)-4,5-dihydrooxazol-4-ol (2o).** The desired pure product was obtained in 86% yield (117 mg) as a white solid. M.P. = 138 °C - 140 °C. <sup>1</sup>H NMR (400 MHz, CHCl<sub>3</sub>)  $\delta$  7.59 (d,  $J$  = 8.5 Hz, 1H), 7.51 (s, 1H), 6.89 (d,  $J$  = 8.3 Hz, 1H), 5.98 (s, 1H), 4.46 - 4.32 (m, 2H), 3.93 (s, 6H). <sup>13</sup>C NMR (151 MHz, CDCl<sub>3</sub>)  $\delta$  166.8, 152.3,



148.7, 122.4, 119.3, 111.2, 110.5, 89.5, 74.4, 56.0, 55.9. HRMS (ESI)  $m/z$ :  $[M + H]^+$  calcd for  $C_{11}H_{14}NO_4$  224.0917; found 224.0917.

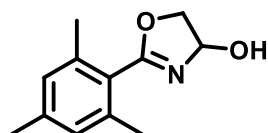

**2,4,6-Trimethyl-4,5-dihydrooxazol-4-ol (2p).** The desired pure product was obtained in 68% yield (70 mg) as a white solid. M.P. = 135 °C - 137 °C.  $^1H$  NMR (400 MHz,  $CDCl_3$ )  $\delta$  6.86 (s, 2H), 5.92 (dd,  $J = 7.0, 4.2$  Hz, 1H), 4.37 - 4.21 (m, 2H), 2.30 (s, 6H), 2.28 (s, 3H).  $^{13}C$  NMR (151 MHz,  $CDCl_3$ )  $\delta$  167.7, 139.6, 136.7, 128.3, 125.1, 89.3, 73.7, 21.1, 19.5. HRMS (ESI)  $m/z$ :  $[M + H]^+$  calcd for  $C_{12}H_{16}NO_2$  206.1176; found 206.1176.

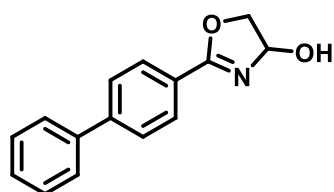

**2-([1,1'-Biphenyl]-4-yl)-4,5-dihydrooxazol-4-ol (2q).** The desired pure product was obtained in 70% yield (84 mg) as a white solid. M.P. = 175 °C - 177 °C.  $^1H$  NMR (600 MHz,  $DMSO-d_6$ )  $\delta$  7.97 - 7.95 (m, 2H), 7.78 (d,  $J = 2.0$  Hz, 2H), 7.72 - 7.69 (m, 3H), 7.48 - 7.44 (m, 2H), 6.19 (d,  $J = 6.0$  Hz, 1H), 5.77 - 5.74 (m, 1H), 4.42 - 4.39 (m, 2H).  $^{13}C$  NMR (151 MHz,  $DMSO-d_6$ )  $\delta$  164.1, 143.7, 139.4, 129.5, 128.6, 127.3, 127.2, 126.9, 126.8, 90.0, 74.4. HRMS (ESI)  $m/z$ :  $[M + H]^+$  calcd for  $C_{15}H_{14}NO_2$  240.1019; found 240.1023.

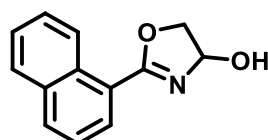

**2-(Naphthalen-1-yl)-4,5-dihydrooxazol-4-ol (2r).** The desired pure product was obtained in 78% yield (85 mg) as a white solid. M.P. = 120 °C - 122 °C.  $^1H$  NMR (400 MHz,  $CDCl_3$ )  $\delta$  8.87 (d,  $J = 8.5$  Hz, 1H), 8.08 (d,  $J = 7.3$  Hz, 1H), 7.98 (d,  $J = 8.2$  Hz,

1H), 7.88 (d,  $J = 8.0$  Hz, 1H), 7.63 - 7.47 (m, 3H), 6.08 (dd,  $J = 7.1, 4.4$  Hz, 1H), 5.93 (s, 1H), 4.48 - 4.32 (m, 2H).  $^{13}\text{C}$  NMR (151 MHz,  $\text{CDCl}_3$ )  $\delta$  167.3, 133.7, 132.5, 130.9, 129.4, 128.5, 127.4, 126.3, 125.9, 124.7, 124.2, 90.0, 73.7. HRMS (ESI)  $m/z$ :  $[\text{M} + \text{H}]^+$  calcd for  $\text{C}_{13}\text{H}_{12}\text{NO}_2$  214.0863; found 214.0861.

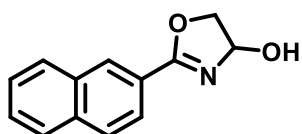

**2-(Naphthalen-2-yl)-4,5-dihydrooxazol-4-ol (2s).** The desired pure product was obtained in 86% yield (92 mg) as a white solid. M.P. = 143 °C - 145 °C.  $^1\text{H}$  NMR (400 MHz,  $\text{CDCl}_3$ )  $\delta$  8.49 (s, 1H), 8.04 (d,  $J = 8.6$  Hz, 1H), 7.94 - 7.85 (m, 3H), 7.60 - 7.51 (m, 2H), 6.13 - 6.10 (m, 1H), 4.58 - 4.43 (m, 2H).  $^{13}\text{C}$  NMR (151 MHz,  $\text{CDCl}_3$ )  $\delta$  166.9, 135.1, 132.6, 129.7, 129.1, 128.4, 128.0, 127.8, 126.7, 124.7, 124.2, 89.6, 74.4. HRMS (ESI)  $m/z$ :  $[\text{M} + \text{H}]^+$  calcd for  $\text{C}_{13}\text{H}_{12}\text{NO}_2$  214.0863; found 214.0862.

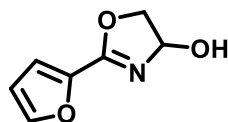

**2-(Furan-2-yl)-4,5-dihydrooxazol-4-ol (2t).** The desired pure product was obtained in 57% yield (44 mg) as a white solid. M.P. = 100 °C - 102 °C.  $^1\text{H}$  NMR (600 MHz,  $\text{CDCl}_3$ )  $\delta$  7.59 - 7.58 (m, 1H), 7.06 (d,  $J = 3.5$  Hz, 1H), 6.50 - 6.49 (m, 1H), 6.01 (dd,  $J = 6.8, 4.2$  Hz, 1H), 4.44 - 4.32 (m, 2H).  $^{13}\text{C}$  NMR (151 MHz,  $\text{CDCl}_3$ )  $\delta$  158.7, 146.1, 142.2, 116.2, 111.7, 89.3, 74.4. HRMS (ESI)  $m/z$ :  $[\text{M} + \text{H}]^+$  calcd for  $\text{C}_7\text{H}_8\text{NO}_3$  154.0499; found 154.0501.

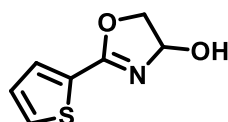

**2-(Thiophen-2-yl)-4,5-dihydrooxazol-4-ol (2u).** The desired pure product was obtained in 87% yield (74 mg) as a white solid. M.P. = 88 °C - 90 °C.  $^1\text{H}$  NMR (400 MHz,  $\text{CDCl}_3$ )  $\delta$  7.70 (d,  $J = 3.7$  Hz, 1H), 7.52 (d,  $J = 4.7$  Hz, 1H), 7.11 - 7.09 (m, 1H),

6.00 (dd,  $J = 6.9, 4.2$  Hz, 1H), 4.49 - 4.35 (m, 2H).  $^{13}\text{C}$  NMR (151 MHz,  $\text{CDCl}_3$ )  $\delta$  162.4, 131.8, 131.1, 129.3, 127.9, 89.4, 74.7. HRMS (ESI)  $m/z$ :  $[\text{M} + \text{H}]^+$  calcd for  $\text{C}_7\text{H}_8\text{NO}_2\text{S}$  170.0270; found 170.0271.

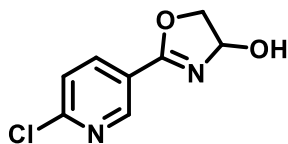

**2-(6-Chloropyridin-3-yl)-4,5-dihydrooxazol-4-ol (2v).** The desired pure product was obtained in 74% yield (73 mg) as a white solid. M.P. = 135 °C - 137 °C.  $^1\text{H}$  NMR (600 MHz,  $\text{CDCl}_3$ )  $\delta$  8.96 (d,  $J = 1.8$  Hz, 1H), 8.19 (dd,  $J = 8.3, 2.4$  Hz, 1H), 7.42 (d,  $J = 8.3$  Hz, 1H), 6.01 (dd,  $J = 7.0, 4.4$  Hz, 1H), 4.53 - 4.37 (m, 2H).  $^{13}\text{C}$  NMR (151 MHz,  $\text{CDCl}_3$ )  $\delta$  164.2, 155.0, 150.0, 138.5, 124.3, 122.1, 89.4, 74.6. HRMS (ESI)  $m/z$ :  $[\text{M} + \text{H}]^+$  calcd for  $\text{C}_8\text{H}_8\text{ClN}_2\text{O}_2$  199.0269; found 199.0269.

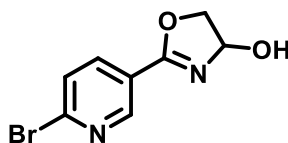

**2-(6-Bromopyridin-3-yl)-4,5-dihydrooxazol-4-ol (2w).** The desired pure product was obtained in 64% yield (68 mg) as a white solid. M.P. = 140 °C - 142 °C.  $^1\text{H}$  NMR (400 MHz,  $\text{CDCl}_3$ )  $\delta$  8.96 (d,  $J = 1.6$  Hz, 1H), 8.19 (dd,  $J = 8.3, 2.4$  Hz, 1H), 7.42 (d,  $J = 8.4$  Hz, 1H), 6.01 (dd,  $J = 7.0, 4.4$  Hz, 1H), 5.75 (s, 1H), 4.54 - 4.36 (m, 2H).  $^{13}\text{C}$  NMR (151 MHz,  $\text{CDCl}_3$ )  $\delta$  164.2, 155.0, 150.0, 138.5, 124.3, 122.1, 89.5, 74.6. HRMS (ESI)  $m/z$ :  $[\text{M} + \text{H}]^+$  calcd for  $\text{C}_8\text{H}_8\text{BrN}_2\text{O}_2$  242.9764; found 242.9764.

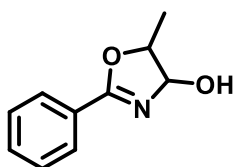

**5-Methyl-2-phenyl-4,5-dihydrooxazol-4-ol (2x).** The desired pure product was obtained in 57% yield (51 mg) as a colorless oil.  $^1\text{H}$  NMR (400 MHz,  $\text{CDCl}_3$ )  $\delta$  7.96 (d,  $J = 7.3$  Hz, 2H), 7.54 - 7.42 (m, 3H), 5.84 - 5.53 (m, 1H), 4.77 - 4.65 (m, 1H), 1.56 -

1.43 (m, 3H).  $^{13}\text{C}$  NMR (151 MHz,  $\text{CDCl}_3$ )  $\delta$  161.3, 127.3, 127.2, 123.9, 123.8, 123.7, 123.7, 122.5, 122.4, 90.5, 84.1, 78.2, 75.3, 14.0, 13.9. HRMS (ESI)  $m/z$ :  $[\text{M} + \text{H}]^+$  calcd for  $\text{C}_{10}\text{H}_{12}\text{NO}_2$  178.0863; found 178.0863.

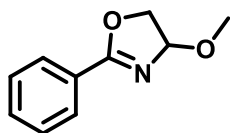

**4-Methoxy-2-phenyl-4,5-dihydrooxazole (4a).** The desired pure product was obtained in 90% yield (80 mg) as a colorless oil.  $^1\text{H}$  NMR (400 MHz,  $\text{CDCl}_3$ )  $\delta$  8.00 (d,  $J = 7.4$  Hz, 2H), 7.50 (t,  $J = 7.4$  Hz, 1H), 7.41 (t,  $J = 7.5$  Hz, 2H), 5.53 (dd,  $J = 7.2, 4.4$  Hz, 1H), 4.42 - 4.22 (m, 2H), 3.53 (s, 3H).  $^{13}\text{C}$  NMR (151 MHz,  $\text{CDCl}_3$ )  $\delta$  167.0, 131.9, 128.7, 128.3, 127.4, 97.9, 72.4, 55.4. HRMS (ESI)  $m/z$ :  $[\text{M} + \text{H}]^+$  calcd for  $\text{C}_{10}\text{H}_{12}\text{NO}_2$  178.0863; found 178.0862.

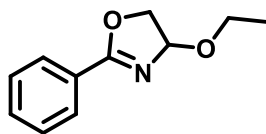

**4-Ethoxy-2-phenyl-4,5-dihydrooxazole (4b).** The desired pure product was obtained in 92% yield (88 mg) as a colorless oil.  $^1\text{H}$  NMR (400 MHz,  $\text{CDCl}_3$ )  $\delta$  7.99 (d,  $J = 7.6$  Hz, 2H), 7.49 (t,  $J = 7.6$  Hz, 1H), 7.41 (t,  $J = 7.5$  Hz, 2H), 5.63 - 5.60 (m, 1H), 4.44 - 4.25 (m, 2H), 4.00 - 3.61 (m, 2H), 1.25 (t,  $J = 7.0$  Hz, 3H).  $^{13}\text{C}$  NMR (151 MHz,  $\text{CDCl}_3$ )  $\delta$  166.8, 131.8, 128.7, 128.3, 127.5, 96.7, 72.6, 63.6, 15.3. HRMS (ESI)  $m/z$ :  $[\text{M} + \text{H}]^+$  calcd for  $\text{C}_{11}\text{H}_{14}\text{NO}_2$  192.1019; found 192.1019.

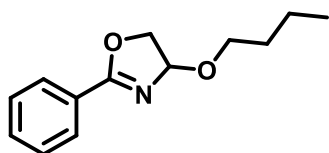

**4-Butoxy-2-phenyl-4,5-dihydrooxazole (4c).** The desired pure product was obtained in 82% yield (90 mg) as a colorless oil.  $^1\text{H}$  NMR (400 MHz,  $\text{CDCl}_3$ )  $\delta$  7.99 (d,  $J = 7.0$  Hz, 2H), 7.50 - 7.47 (m, 1H), 7.42 - 7.39 (m, 2H), 5.61 - 5.58 (m, 1H), 4.42 - 4.23 (m, 2H), 3.92 - 3.53 (m, 2H), 1.61 - 1.56 (m, 2H), 1.41 - 1.35 (m, 2H), 0.92 (t,  $J = 6.7$  Hz,

3H).  $^{13}\text{C}$  NMR (151 MHz,  $\text{CDCl}_3$ )  $\delta$  166.7, 131.8, 128.7, 128.3, 127.5, 96.8, 72.6, 68.0, 31.9, 19.3, 13.9. HRMS (ESI)  $m/z$ :  $[\text{M} + \text{H}]^+$  calcd for  $\text{C}_{13}\text{H}_{18}\text{NO}_2$  220.1332; found 220.1331.

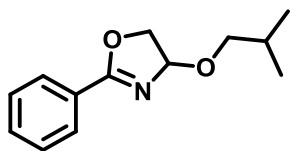

**4-Isobutoxy-2-phenyl-4,5-dihydrooxazole (4d).** The desired pure product was obtained in 80% yield (88 mg) as a colorless oil.  $^1\text{H}$  NMR (400 MHz,  $\text{CDCl}_3$ )  $\delta$  8.00 (d,  $J = 7.3$  Hz, 2H), 7.52 - 7.47 (m, 1H), 7.41 (t,  $J = 7.6$  Hz, 2H), 5.60 (dd,  $J = 7.2, 4.5$  Hz, 1H), 4.43 - 4.25 (m, 2H), 3.70 - 3.29 (m, 2H), 1.92 - 1.86 (m, 1H), 0.93 - 0.91 (m, 6H).  $^{13}\text{C}$  NMR (151 MHz,  $\text{CDCl}_3$ )  $\delta$  166.6, 131.8, 128.7, 128.3, 127.5, 97.0, 74.9, 72.6, 28.6, 19.4, 19.3. HRMS (ESI)  $m/z$ :  $[\text{M} + \text{H}]^+$  calcd for  $\text{C}_{13}\text{H}_{18}\text{NO}_2$  220.1332; found 220.1332.

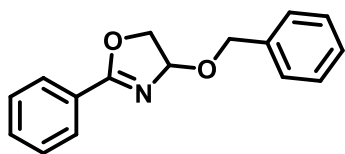

**4-(Benzyloxy)-2-phenyl-4,5-dihydrooxazole (4e).** The desired pure product was obtained in 79% yield (100 mg) as a colorless oil.  $^1\text{H}$  NMR (400 MHz,  $\text{CDCl}_3$ )  $\delta$  8.04 (d,  $J = 7.2$  Hz, 2H), 7.55 - 7.23 (m, 8H), 5.74 (dd,  $J = 7.2, 4.5$  Hz, 1H), 4.86 (dd,  $J = 104.9, 11.7$  Hz, 2H), 4.45 - 4.33 (m, 2H).  $^{13}\text{C}$  NMR (151 MHz,  $\text{CDCl}_3$ )  $\delta$  167.1, 138.0, 131.9, 128.8, 128.4, 128.3, 128.0, 127.7, 127.5, 96.2, 72.7, 69.9. HRMS (ESI)  $m/z$ :  $[\text{M} + \text{H}]^+$  calcd for  $\text{C}_{16}\text{H}_{16}\text{NO}_2$  254.1176; found 254.1176.

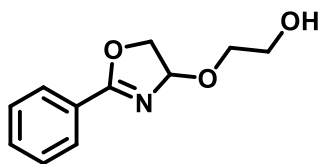

**2-((2-Phenyl-4,5-dihydrooxazol-4-yl)oxy)ethan-1-ol (4f).** The desired pure product was obtained in 90% yield (94 mg) as a colorless oil.  $^1\text{H}$  NMR (400 MHz,  $\text{CDCl}_3$ )  $\delta$

7.97 (d,  $J = 7.8$  Hz, 2H), 7.53 (t,  $J = 7.1$  Hz, 1H), 7.43 (t,  $J = 7.6$  Hz, 2H), 5.60 (dd,  $J = 7.4, 4.7$  Hz, 1H), 4.54 - 4.30 (m, 2H), 4.00 - 3.84 (m, 2H), 3.80 - 3.67 (m, 2H).  $^{13}\text{C}$  NMR (151 MHz,  $\text{CDCl}_3$ )  $\delta$  167.1, 132.3, 128.8, 128.5, 126.7, 97.7, 73.1, 73.0, 62.9. HRMS (ESI)  $m/z$ :  $[\text{M} + \text{H}]^+$  calcd for  $\text{C}_{11}\text{H}_{14}\text{NO}_3$  208.0968; found 208.0969.

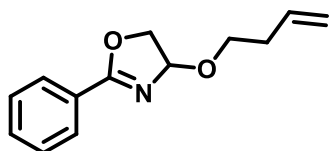

**4-(But-3-en-1-yloxy)-2-phenyl-4,5-dihydrooxazole (4g).** The desired pure product was obtained in 60% yield (65 mg) as a colorless oil.  $^1\text{H}$  NMR (400 MHz,  $\text{CDCl}_3$ )  $\delta$  8.01 - 7.98 (m, 2H), 7.52 - 7.48 (m, 1H), 7.44 - 7.39 (m, 2H), 5.89 - 5.79 (m, 1H), 5.62 (dd,  $J = 7.2, 4.5$  Hz, 1H), 5.14 - 5.02 (m, 2H), 4.43 - 4.26 (m, 2H), 3.99 - 3.61 (m, 2H), 2.42 - 2.36 (m, 2H).  $^{13}\text{C}$  NMR (151 MHz,  $\text{CDCl}_3$ )  $\delta$  166.8, 135.1, 131.9, 128.7, 128.3, 127.4, 116.4, 96.9, 72.6, 67.4, 34.3. HRMS (ESI)  $m/z$ :  $[\text{M} + \text{H}]^+$  calcd for  $\text{C}_{13}\text{H}_{16}\text{NO}_2$  218.1176; found 218.1176.

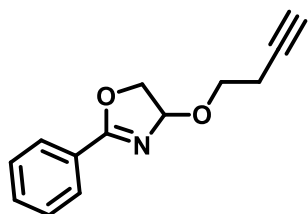

**4-(But-3-yn-1-yloxy)-2-phenyl-4,5-dihydrooxazole (4h).** The desired pure product was obtained in 63% yield (67 mg) as a colorless oil.  $^1\text{H}$  NMR (400 MHz,  $\text{CDCl}_3$ )  $\delta$  7.99 (d,  $J = 7.4$  Hz, 2H), 7.50 (t,  $J = 7.3$  Hz, 1H), 7.41 (t,  $J = 7.6$  Hz, 2H), 5.66 (dd,  $J = 7.2, 4.3$  Hz, 1H), 4.44 - 4.29 (m, 2H), 4.03 - 3.71 (m, 2H), 2.55 - 2.48 (m, 2H), 1.99 (t,  $J = 2.6$  Hz, 1H).  $^{13}\text{C}$  NMR (151 MHz,  $\text{CDCl}_3$ )  $\delta$  167.0, 131.9, 128.7, 128.4, 127.3, 97.0, 81.3, 72.6, 69.3, 66.1, 20.1. HRMS (ESI)  $m/z$ :  $[\text{M} + \text{H}]^+$  calcd for  $\text{C}_{13}\text{H}_{14}\text{NO}_2$  216.1019; found 216.1019.

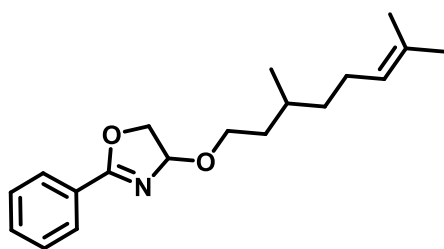

**4-((3,7-Dimethyloct-6-en-1-yl) oxy)-2-phenyl-4,5-dihydrooxazole (4i).** The desired pure product was obtained in 81% yield (122 mg) as a colorless oil.  $^1\text{H}$  NMR (400 MHz,  $\text{CDCl}_3$ )  $\delta$  8.00 (d,  $J = 7.3$  Hz, 2H), 7.50 (t,  $J = 7.4$  Hz, 1H), 7.42 (t,  $J = 7.6$  Hz, 2H), 5.60 (dd,  $J = 7.2, 4.5$  Hz, 1H), 5.12 - 5.06 (m, 1H), 4.43 - 4.25 (m, 2H), 3.98 - 3.58 (m, 2H), 2.02 - 1.95 (m, 2H), 1.67 (s, 4H), 1.59 (s, 3H), 1.46 - 1.18 (m, 4H), 0.91 (d,  $J = 6.6$  Hz, 3H).  $^{13}\text{C}$  NMR (151 MHz,  $\text{CDCl}_3$ )  $\delta$  166.7, 131.8, 128.7, 128.3, 124.8, 96.9, 72.6, 66.6, 66.5, 37.2, 36.8, 36.7, 29.5, 25.7, 25.4, 19.5, 17.6. HRMS (ESI)  $m/z$ :  $[\text{M} + \text{H}]^+$  calcd for  $\text{C}_{19}\text{H}_{28}\text{NO}_2$  302.2115; found 302.2113.

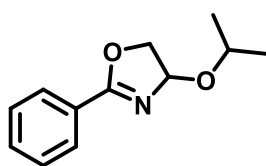

**4-Isopropoxy-2-phenyl-4,5-dihydrooxazole (4j).** The desired pure product was obtained in 83% yield (84 mg) as a colorless oil.  $^1\text{H}$  NMR (400 MHz,  $\text{CDCl}_3$ )  $\delta$  8.01 - 7.98 (m, 2H), 7.51 - 7.47 (m, 1H), 7.43 - 7.38 (m, 2H), 5.69 (dd,  $J = 7.3, 4.4$  Hz, 1H), 4.44 - 4.20 (m, 2H), 4.16 - 4.08 (m, 1H), 1.28 - 1.22 (m, 6H).  $^{13}\text{C}$  NMR (151 MHz,  $\text{CDCl}_3$ )  $\delta$  166.4, 131.7, 128.7, 128.3, 127.6, 94.9, 73.1, 70.0, 23.5, 22.0. HRMS (ESI)  $m/z$ :  $[\text{M} + \text{H}]^+$  calcd for  $\text{C}_{12}\text{H}_{16}\text{NO}_2$  206.1176; found 206.1167.

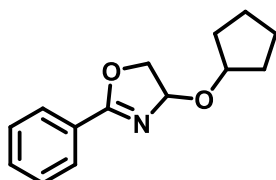

**4-(Cyclopentyloxy)-2-phenyl-4,5-dihydrooxazole (4k).** The desired pure product was obtained in 86% yield (100 mg) as a colorless oil.  $^1\text{H}$  NMR (400 MHz,  $\text{CDCl}_3$ )  $\delta$  8.05 - 7.96 (m, 2H), 7.54 - 7.46 (m, 1H), 7.45 - 7.37 (m, 2H), 5.66 (dd,  $J = 7.3, 4.6$  Hz, 1H), 4.50 - 4.35 (m, 2H), 4.22 (dd,  $J = 9.8, 4.6$  Hz, 1H), 1.93 - 1.78 (m, 2H), 1.76 - 1.65 (m,

4H), 1.60 - 1.49 (m, 2H).  $^{13}\text{C}$  NMR (151 MHz,  $\text{CDCl}_3$ )  $\delta$  166.4, 131.7, 128.7, 128.3, 127.6, 95.5, 79.6, 73.0, 33.4, 32.3, 23.42, 23.39. HRMS (ESI)  $m/z$ :  $[\text{M} + \text{H}]^+$  calcd for  $\text{C}_{14}\text{H}_{18}\text{NO}_2$  232.1332; found 232.1332.

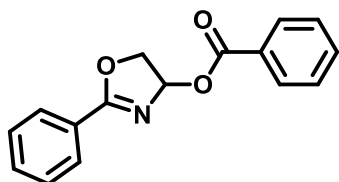

**2-Phenyl-4,5-dihydrooxazol-4-yl benzoate (4l).** The desired pure product was obtained in 75% yield (100 mg) as a colorless oil.  $^1\text{H}$  NMR (400 MHz,  $\text{CDCl}_3$ )  $\delta$  8.14 – 8.03 (m, 4H), 7.61 – 7.51 (m, 2H), 7.49 – 7.40 (m, 4H), 6.92 (dd,  $J = 7.1, 4.2$  Hz, 1H), 4.75 – 4.46 (m, 2H).  $^{13}\text{C}$  NMR (151 MHz,  $\text{CDCl}_3$ )  $\delta$  169.3, 165.9, 133.4, 132.5, 129.9, 129.5, 129.0, 128.5, 128.4, 126.7, 92.5, 73.2. HRMS (ESI)  $m/z$ :  $[\text{M} + \text{H}]^+$  calcd for  $\text{C}_{16}\text{H}_{14}\text{NO}_3$  268.0968; found 268.0966.

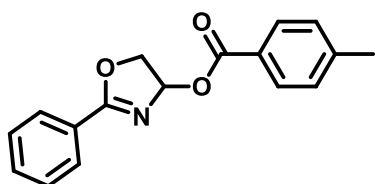

**2-Phenyl-4,5-dihydrooxazol-4-yl 4-methylbenzoate (4m).** The desired pure product was obtained in 70% yield (99 mg) as a colorless oil.  $^1\text{H}$  NMR (400 MHz,  $\text{CDCl}_3$ )  $\delta$  8.09 - 7.96 (m, 4H), 7.57 - 7.43 (m, 3H), 7.22 (d,  $J = 1.8$  Hz, 2H), 6.90 (dd,  $J = 7.1, 4.1$  Hz, 1H), 4.72 - 4.46 (m, 2H), 2.40 (s, 3H).  $^{13}\text{C}$  NMR (151 MHz,  $\text{CDCl}_3$ )  $\delta$  169.2, 165.9, 144.1, 132.4, 129.9, 129.1, 128.9, 128.4, 126.7, 126.6, 92.4, 73.2, 21.7. HRMS (ESI)  $m/z$ :  $[\text{M} + \text{H}]^+$  calcd for  $\text{C}_{17}\text{H}_{16}\text{NO}_3$  282.1125; found 282.1126.

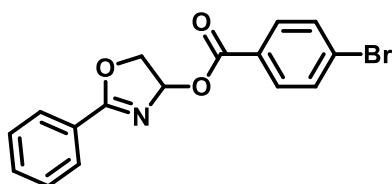

**2-Phenyl-4,5-dihydrooxazol-4-yl 4-bromobenzoate (4n).** The desired pure product was obtained in 55% yield (95 mg) as a colorless oil.  $^1\text{H}$  NMR (400 MHz,  $\text{CDCl}_3$ )  $\delta$



8.03 (d,  $J = 7.7$  Hz, 2H), 7.60 - 7.39 (m, 6H), 6.53 (dd,  $J = 8.6, 5.5$  Hz, 1H), 6.29 - 6.28 (m, 1H), 4.79 - 4.70 (m, 2H).  $^{13}\text{C}$  NMR (151 MHz,  $\text{CDCl}_3$ )  $\delta$  169.3, 165.9, 133.4, 132.5, 129.9, 129.5, 129.0, 128.5, 128.4, 126.6, 92.5, 73.1. HRMS (ESI)  $m/z$ :  $[\text{M} + \text{H}]^+$  calcd for  $\text{C}_{16}\text{H}_{13}\text{BrNO}_3$  346.0073; found 346.0071.

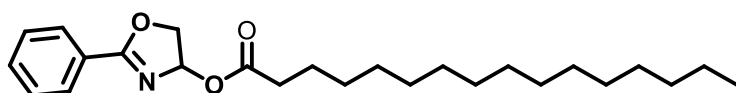

**2-Phenyl-4,5-dihydrooxazol-4-yl palmitate (4o).** The desired pure product was obtained in 60% yield (120 mg) as a colorless oil.  $^1\text{H}$  NMR (400 MHz,  $\text{CDCl}_3$ )  $\delta$  8.04 (d,  $J = 7.2$  Hz, 2H), 7.54 - 7.42 (m, 3H), 6.66 (dd,  $J = 7.1, 4.2$  Hz, 1H), 4.63 - 4.31 (m, 2H), 2.35 (dd,  $J = 7.6, 2.7$  Hz, 2H), 1.66 - 1.62 (m, 2H), 1.24 (s, 24H), 0.87 (t,  $J = 6.7$  Hz, 3H).  $^{13}\text{C}$  NMR (151 MHz,  $\text{CDCl}_3$ )  $\delta$  173.2, 169.1, 132.4, 128.9, 128.4, 126.6, 91.8, 73.2, 34.2, 31.9, 29.7, 29.7, 29.6, 29.6, 29.6, 29.6, 29.4, 29.3, 29.2, 29.1, 24.7, 22.7, 14.1. HRMS (ESI)  $m/z$ :  $[\text{M} + \text{H}]^+$  calcd for  $\text{C}_{25}\text{H}_{40}\text{NO}_3$  402.3003; found 402.3003.

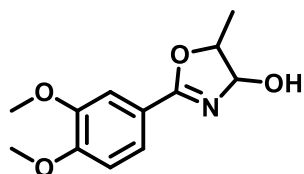

**2-(3,4-Dimethoxyphenyl)-5-methyl-4,5-dihydrooxazol-4-ol (2y).** The desired pure product was obtained in 81% yield (96 mg) as a colorless oil.  $^1\text{H}$  NMR (400 MHz,  $\text{CDCl}_3$ )  $\delta$  7.57- 7.26 (m, 2H), 6.86 (dd,  $J = 9.5, 8.4$  Hz, 1H), 5.77- 5.46 (m, 1H), 4.72- 4.56 (m, 1H), 3.91 (s, 6H), 1.52- 1.24 (m, 3H).  $^{13}\text{C}$  NMR (151 MHz,  $\text{CDCl}_3$ )  $\delta$  169.1, 166.0, 152.2, 152.2, 148.9, 148.7, 125.9, 122.3, 120.1, 119.7, 111.1, 110.8, 110.5, 110.2, 95.5, 88.9, 83.1, 80.2, 56.0, 55.9, 55.9, 55.9, 18.7, 13.1. HRMS (ESI)  $m/z$ :  $[\text{M} + \text{H}]^+$  calcd for  $\text{C}_{12}\text{H}_{16}\text{NO}_4$  238.1074; found 238.1074.

## 5. References

1. Boyington, A. J.; Seath, C. P.; Zearfoss, A. M.; Xu, Z.; Jui, N. T. Catalytic Strategy for Regioselective Arylethylamine Synthesis. *J. Am. Chem. Soc.* **2019**, *141*, 4147-4153.

## 6. NMR Spectra of Products

$^1\text{H}$  NMR (400 MHz,  $\text{DMSO-}d_6$ ) of compound **2a**

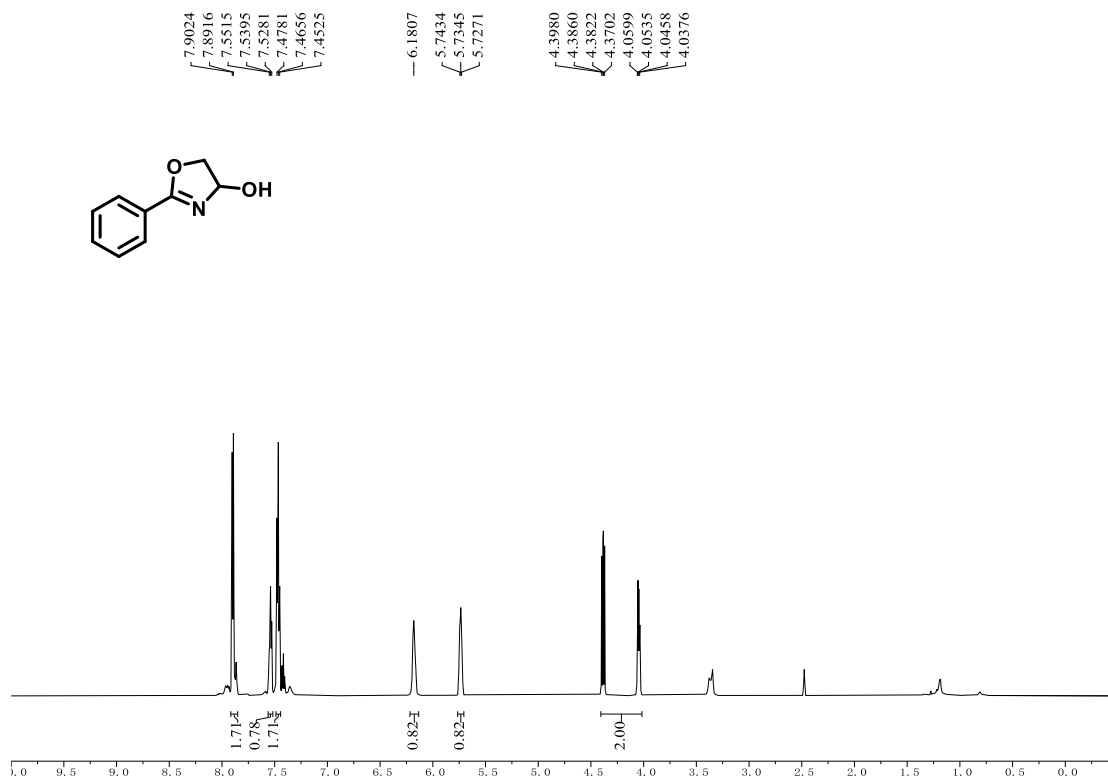

$^{13}\text{C}$  NMR (151 MHz,  $\text{DMSO-}d_6$ ) of compound **2a**

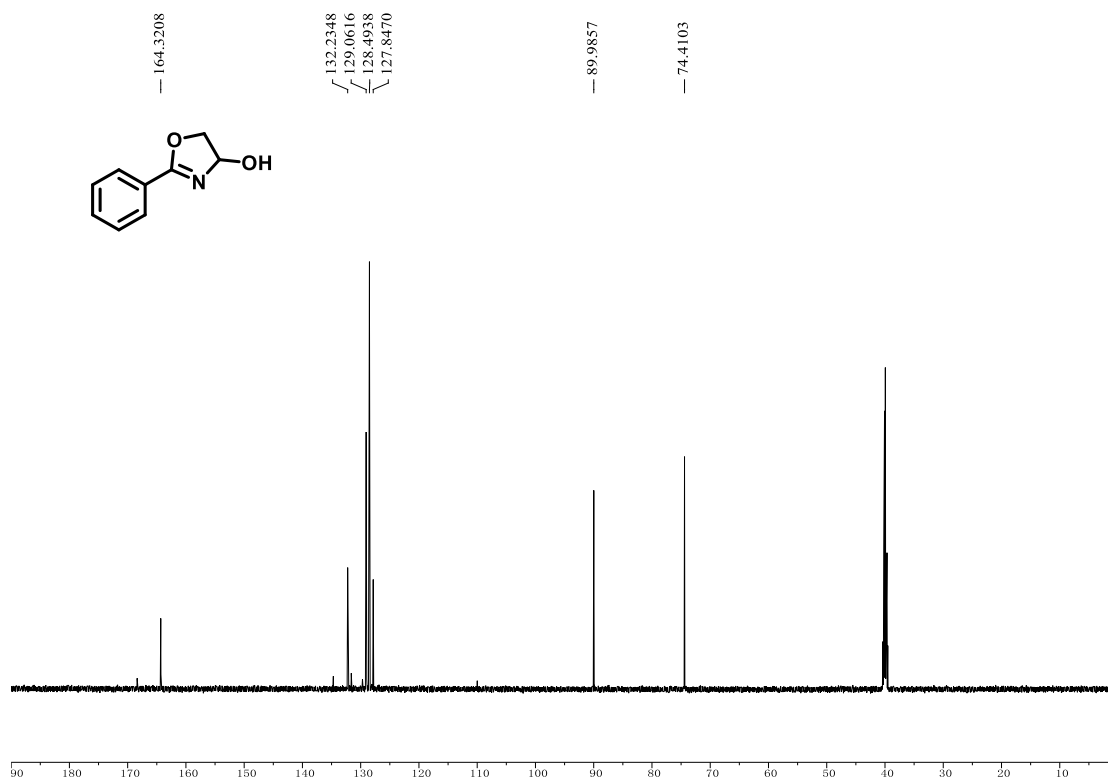

<sup>1</sup>H NMR (400 MHz, CDCl<sub>3</sub>) of compound **2b**

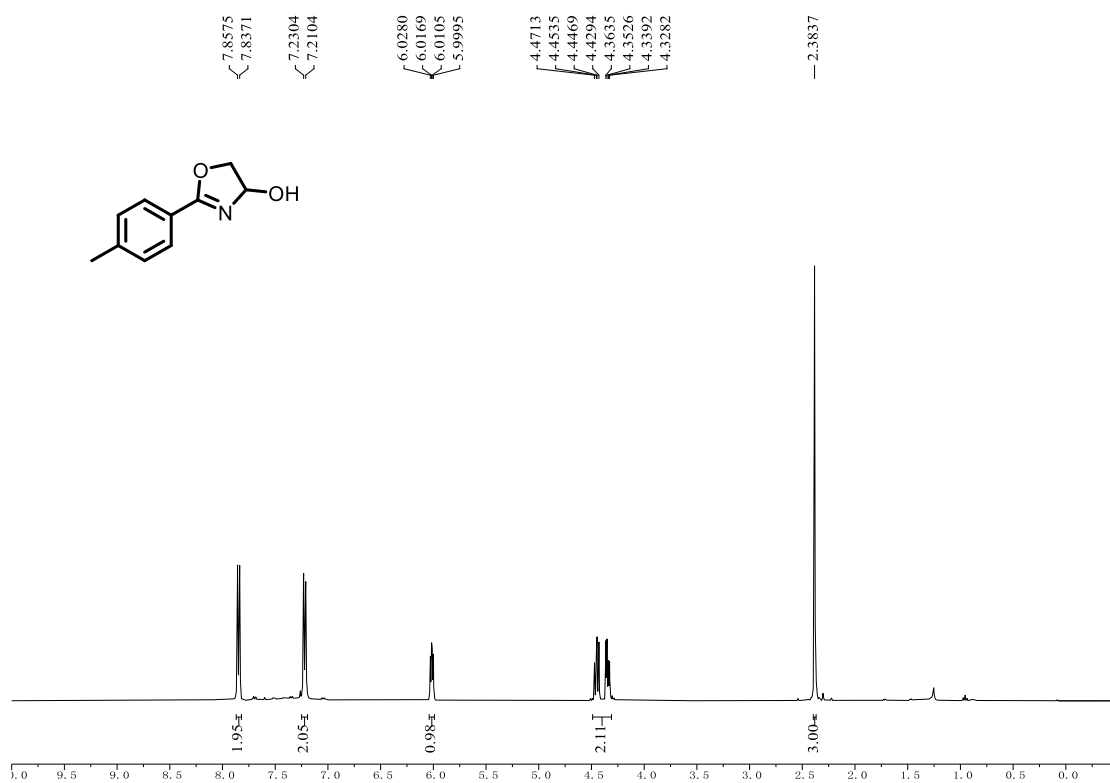

<sup>13</sup>C NMR (151 MHz, CDCl<sub>3</sub>) of compound **2b**

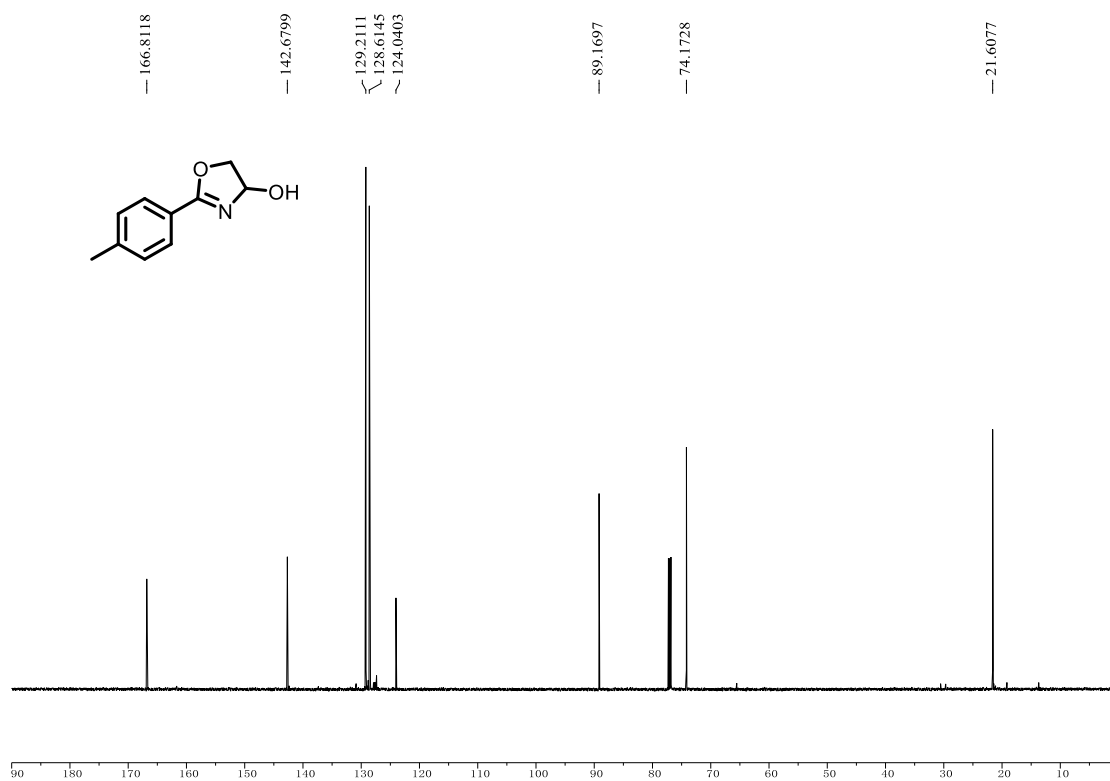

<sup>1</sup>H NMR (600 MHz, CDCl<sub>3</sub>) of compound 2c

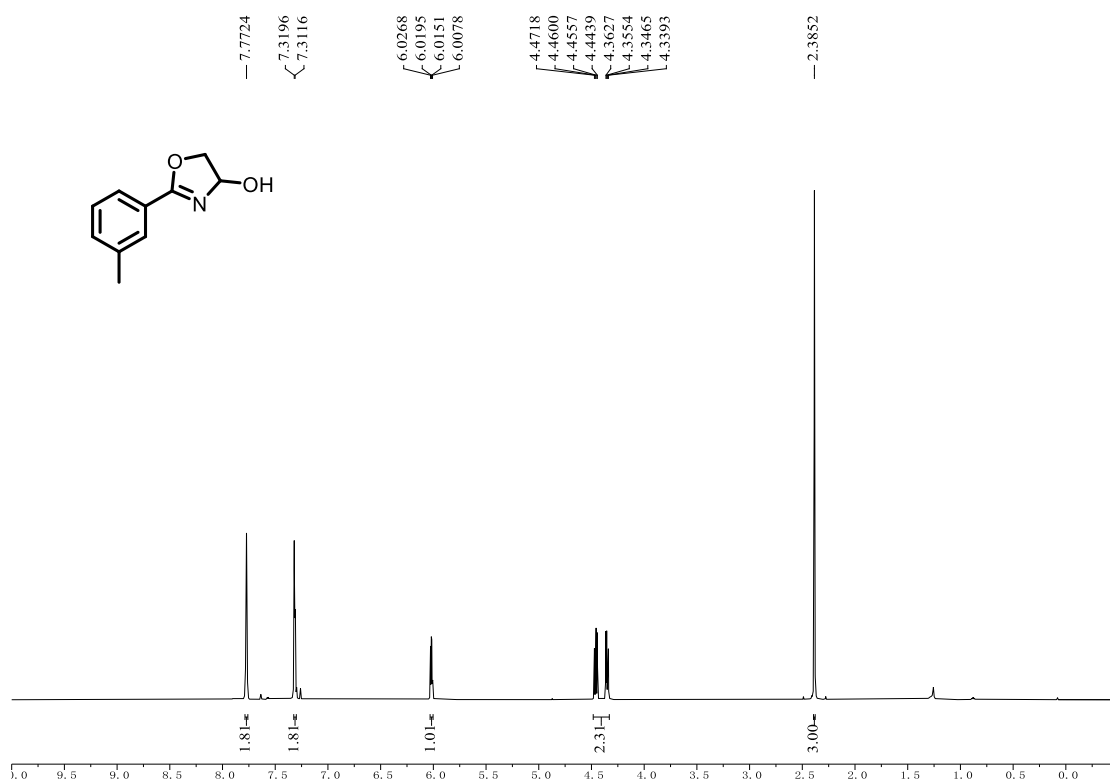

<sup>13</sup>C NMR (151 MHz, CDCl<sub>3</sub>) of compound 2c

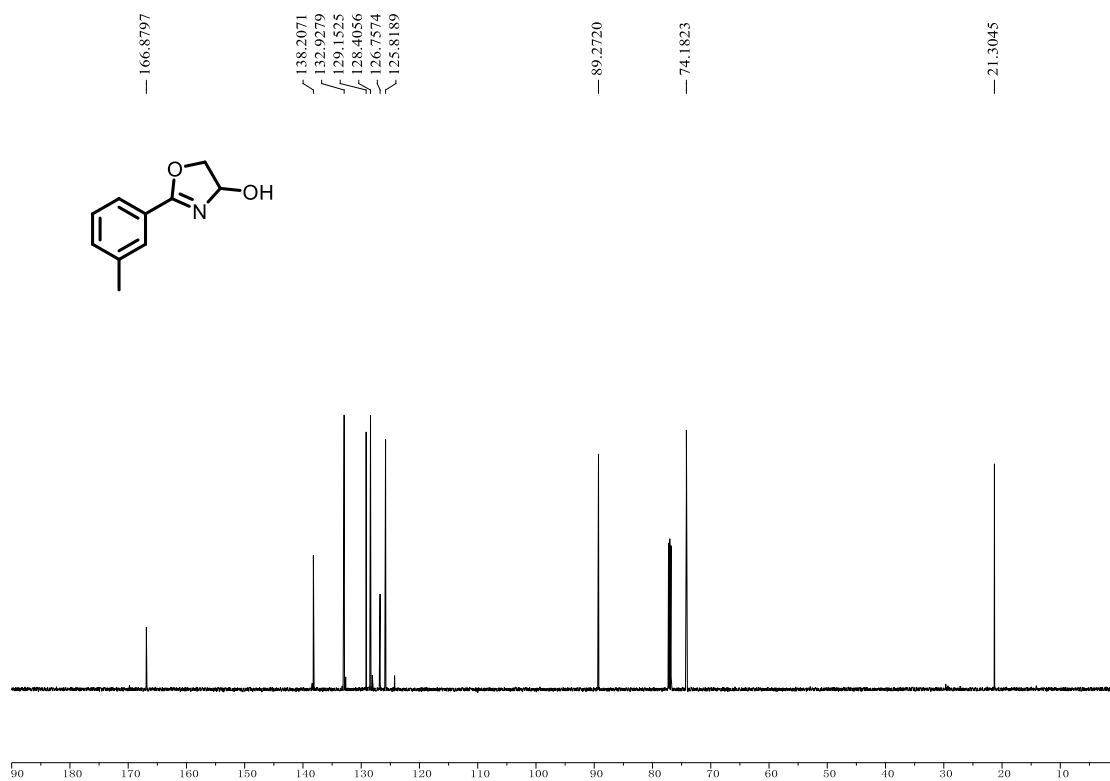

<sup>1</sup>H NMR (600 MHz, CDCl<sub>3</sub>) of compound **2d**

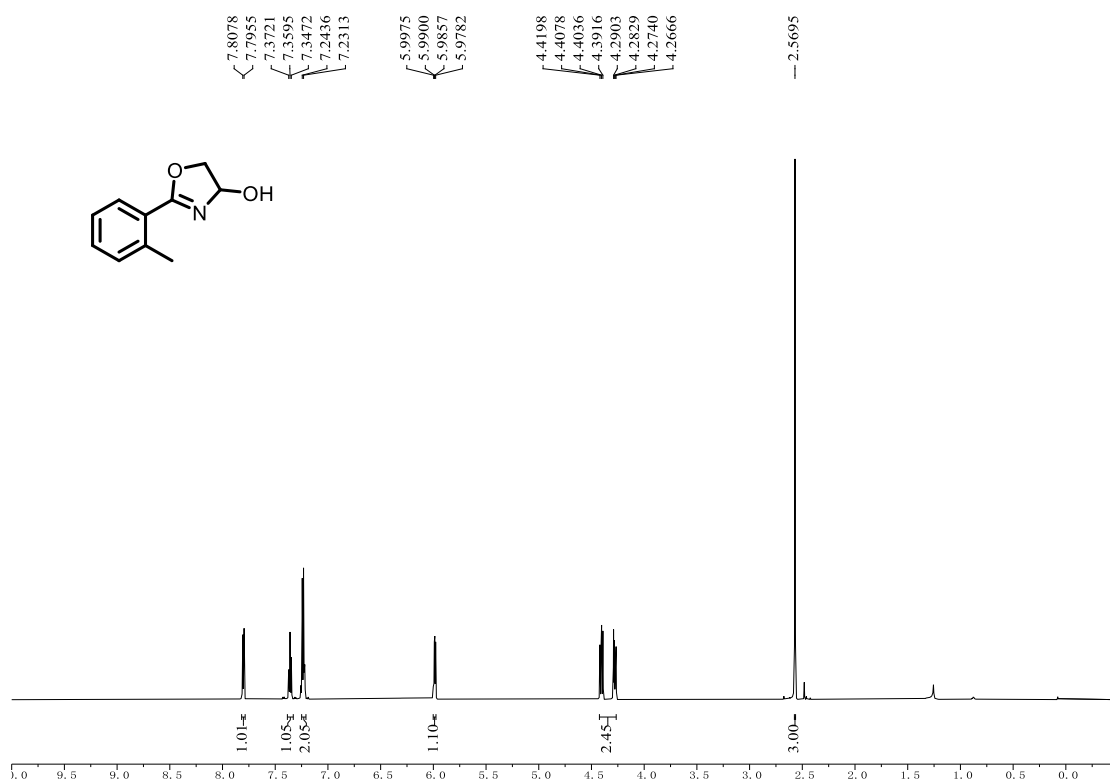

<sup>13</sup>C NMR (151 MHz, CDCl<sub>3</sub>) of compound **2d**

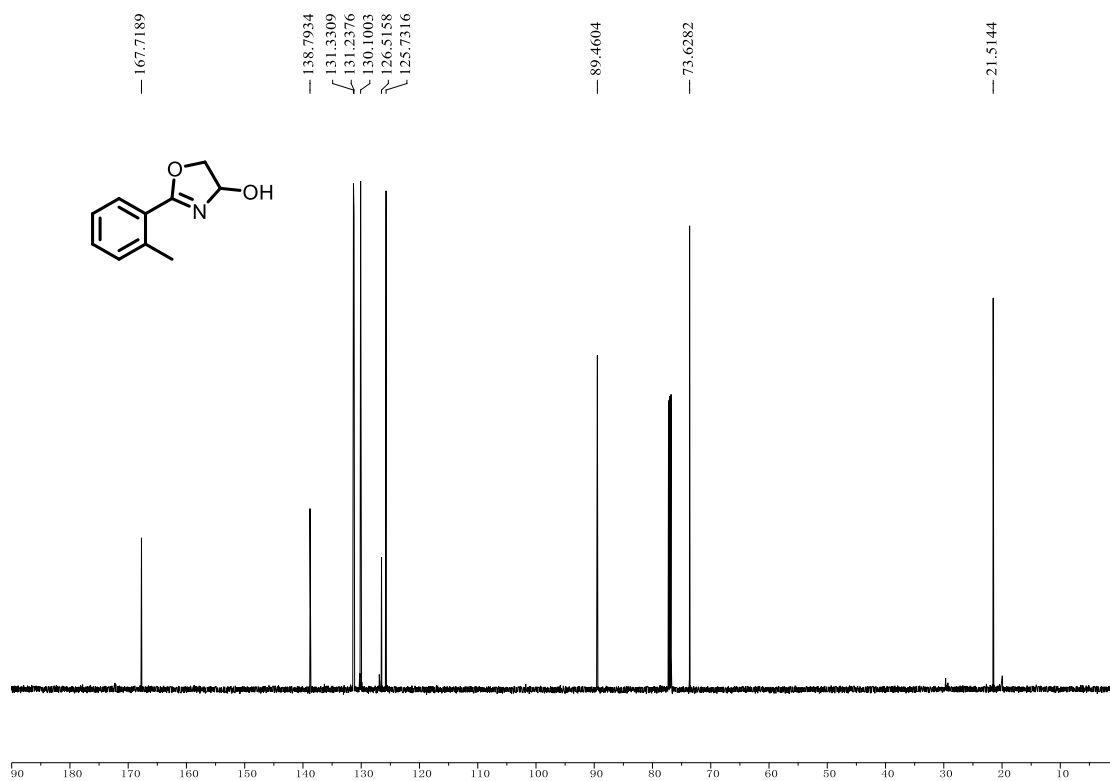

<sup>1</sup>H NMR (400 MHz, CDCl<sub>3</sub>) of compound **2e**

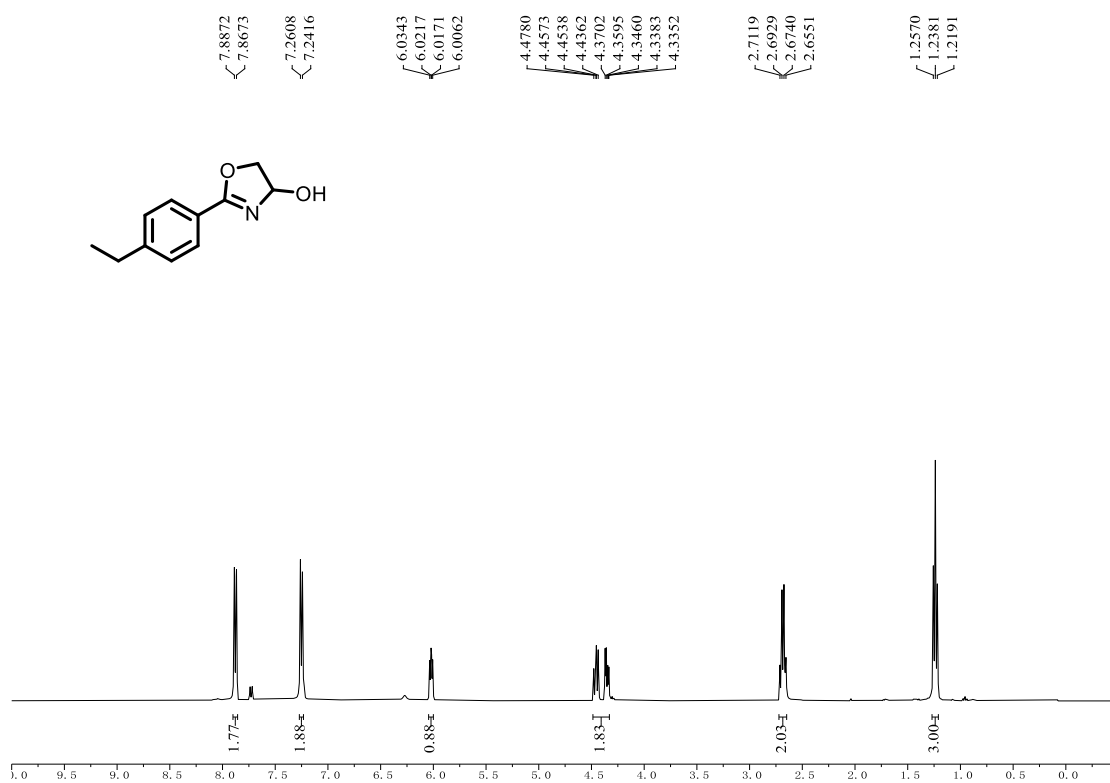

<sup>13</sup>C NMR (151 MHz, CDCl<sub>3</sub>) of compound **2e**

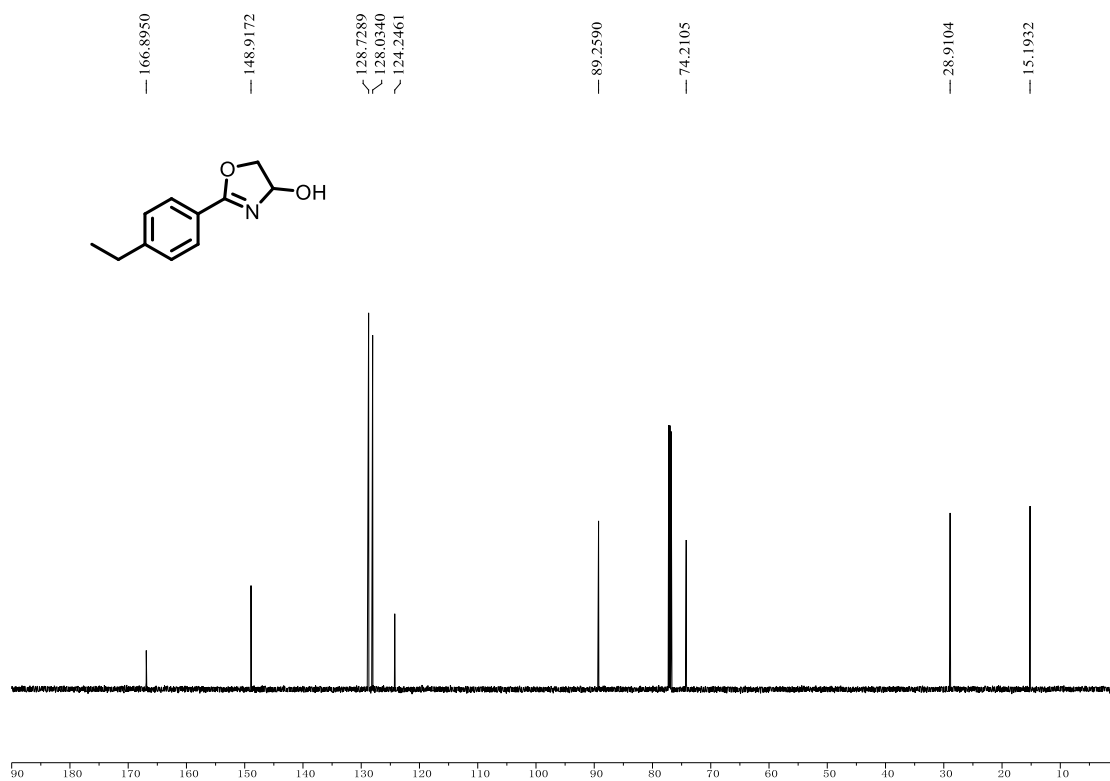

<sup>1</sup>H NMR (400 MHz, CDCl<sub>3</sub>) of compound **2f**

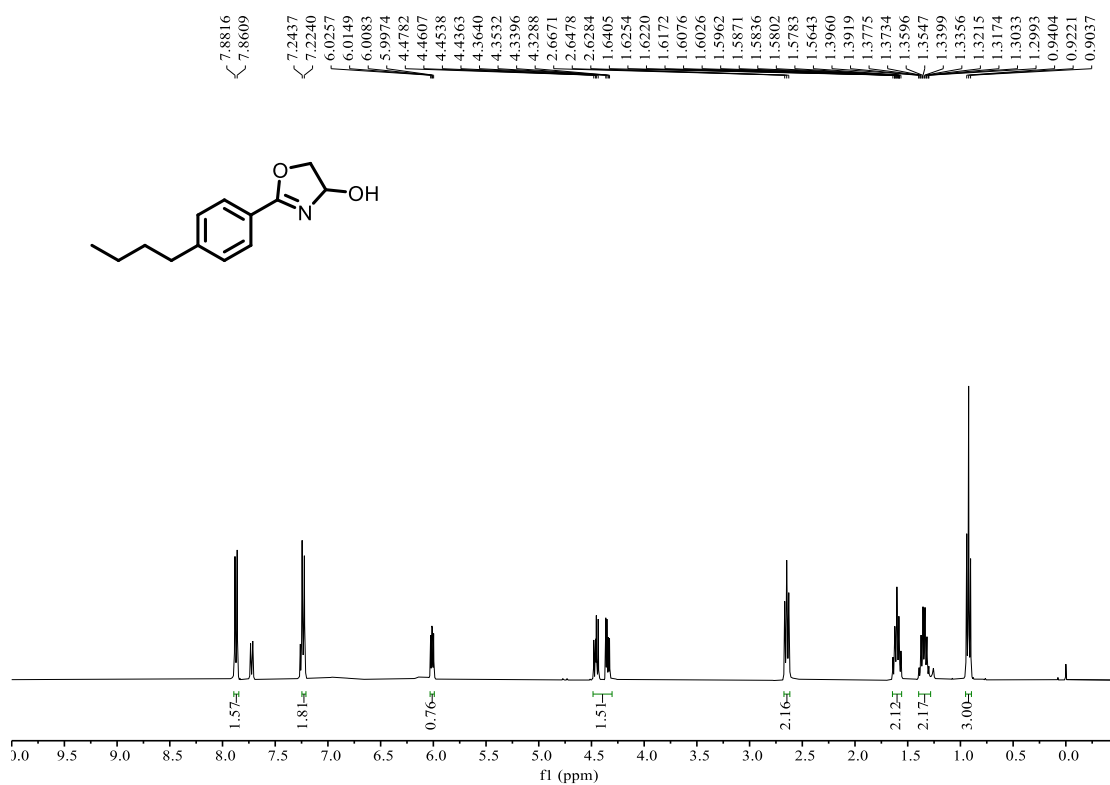

<sup>13</sup>C NMR (151 MHz, CDCl<sub>3</sub>) of compound **2f**

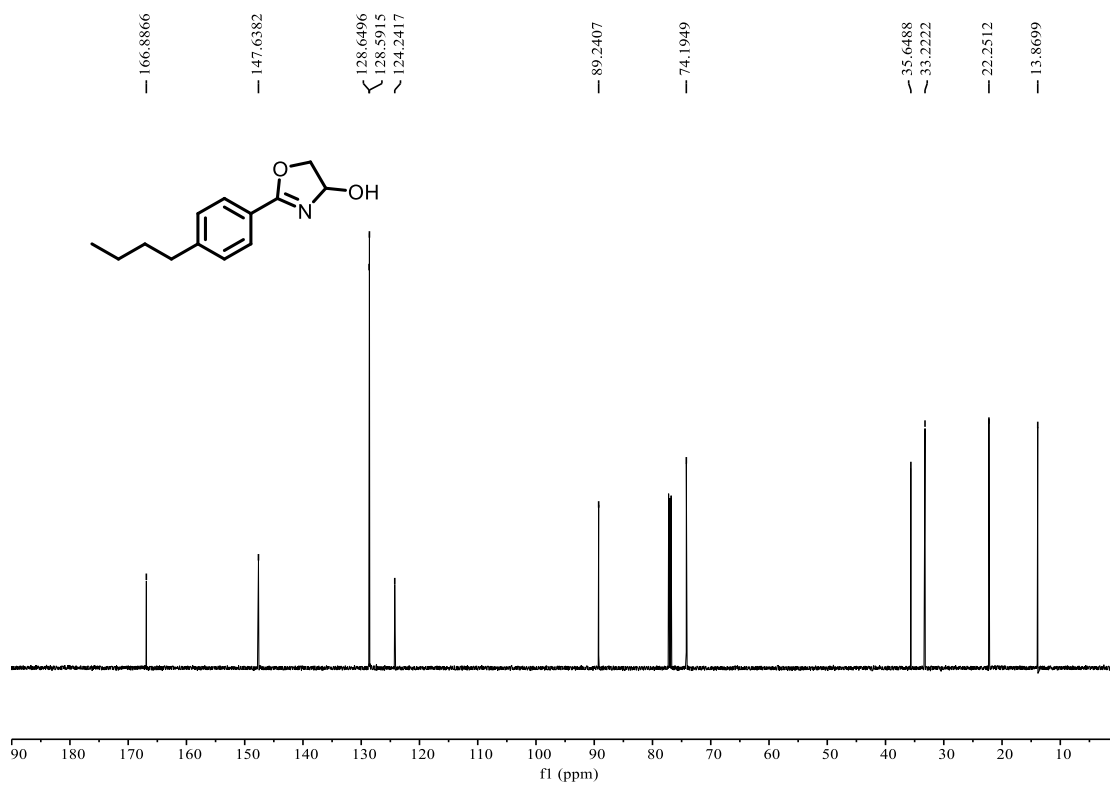



<sup>1</sup>H NMR (400 MHz, CDCl<sub>3</sub>) of compound **2g**

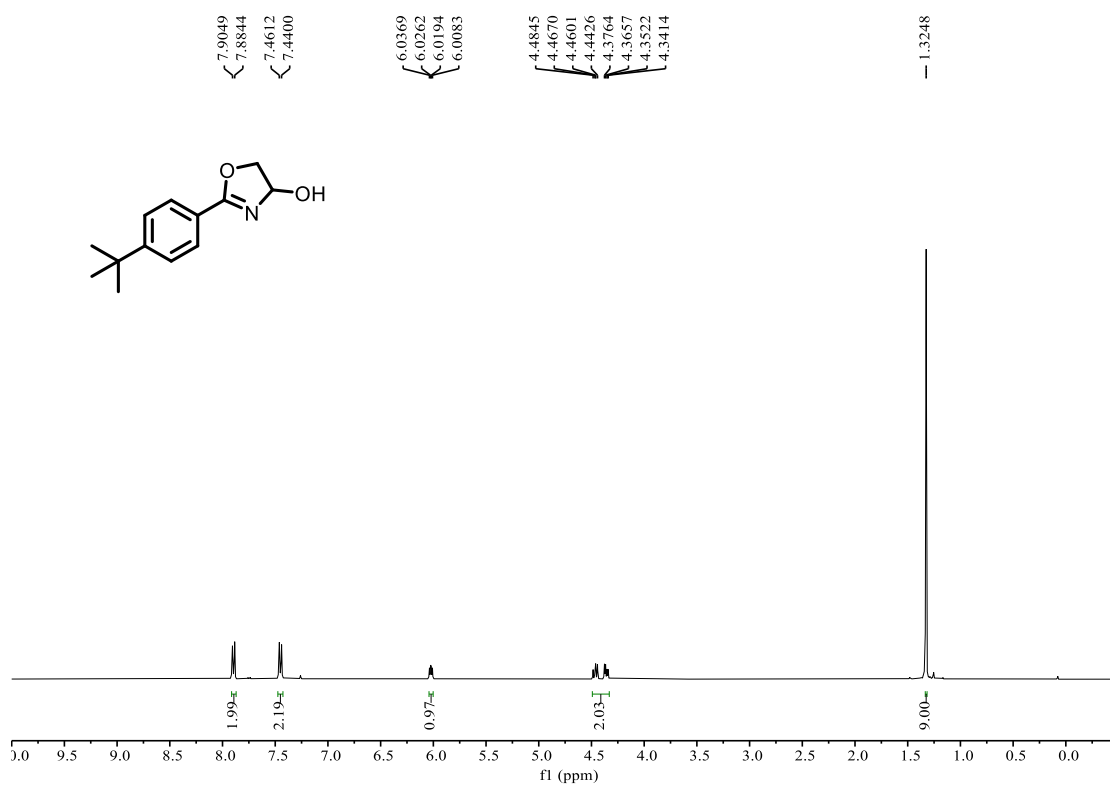

<sup>13</sup>C NMR (151 MHz, CDCl<sub>3</sub>) of compound **2g**

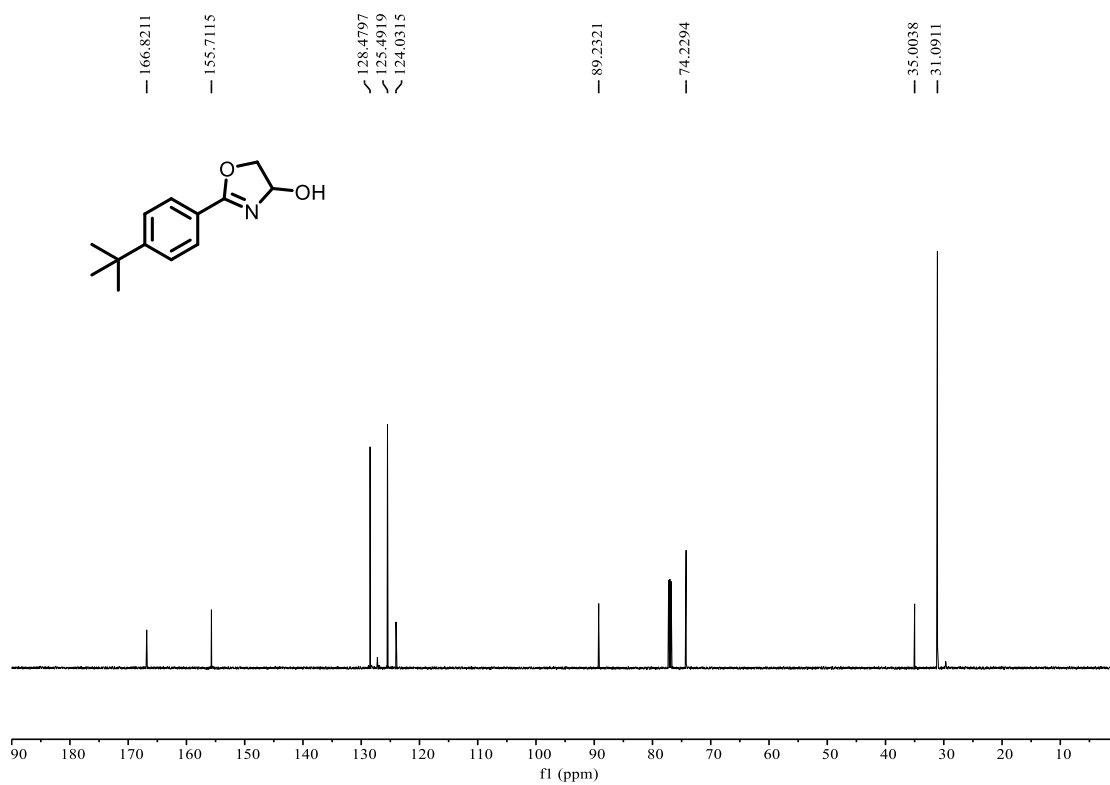

<sup>1</sup>H NMR (400 MHz, CDCl<sub>3</sub>) of compound **2h**

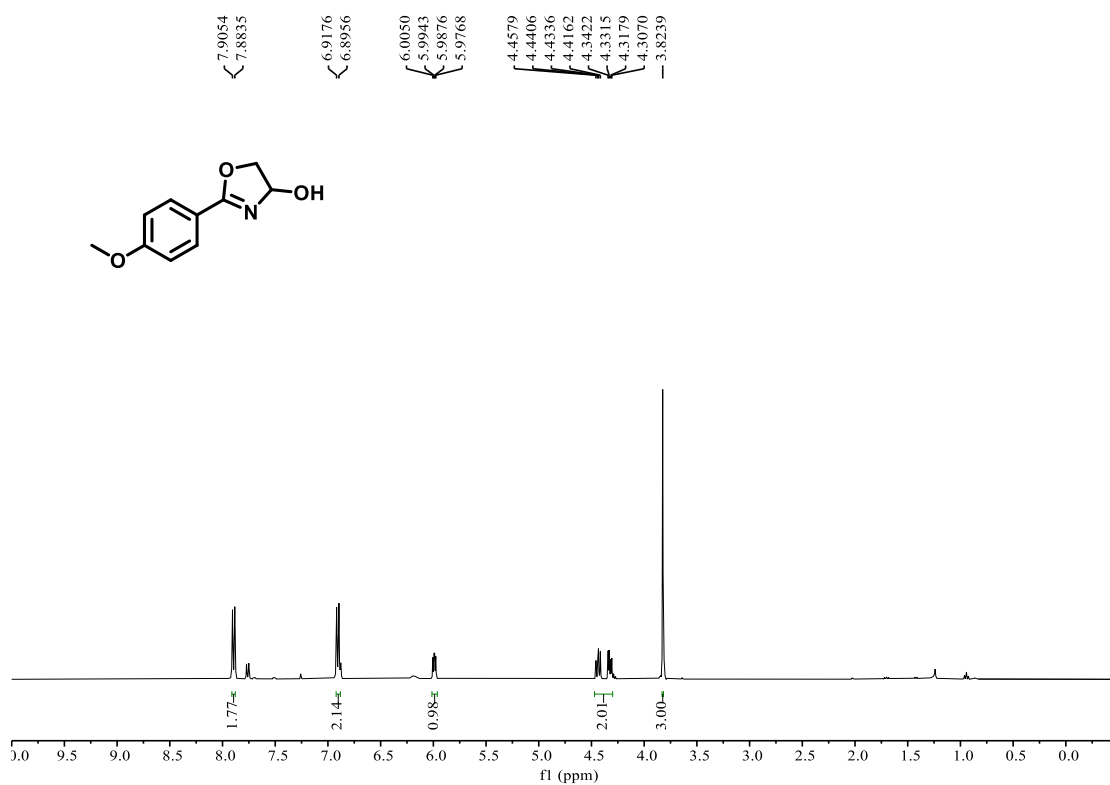

<sup>13</sup>C NMR (151 MHz, CDCl<sub>3</sub>) of compound **2h**

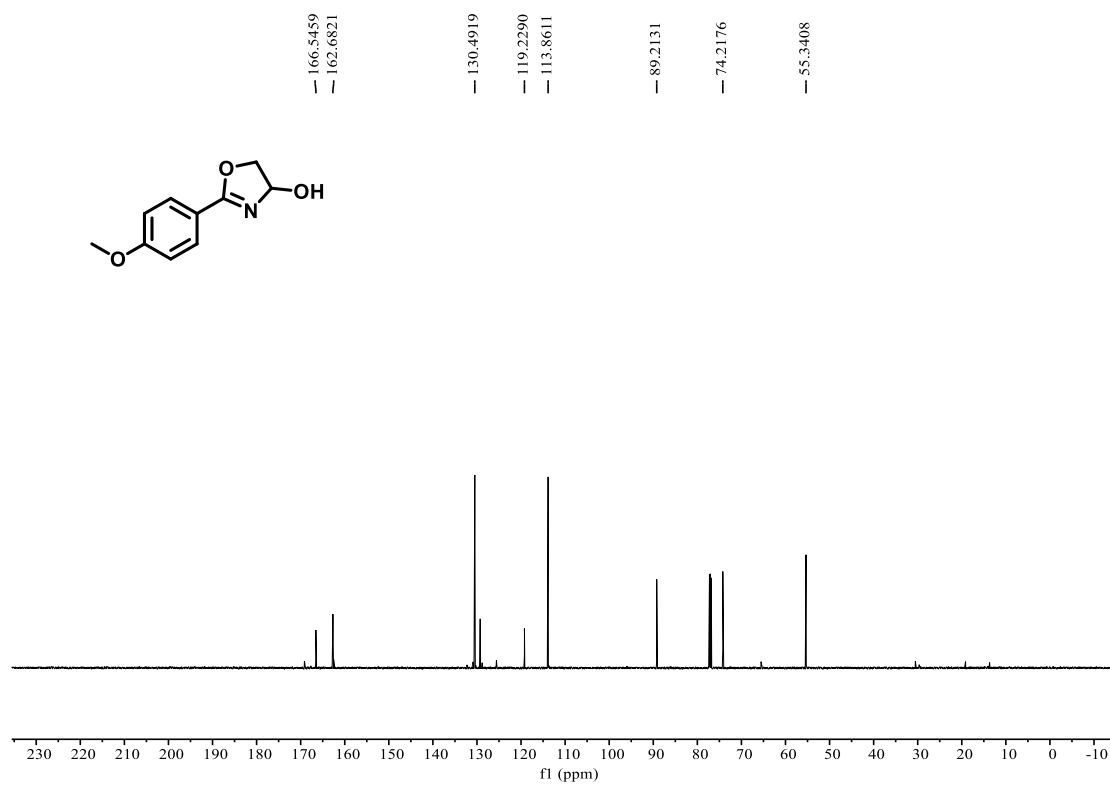

<sup>1</sup>H NMR (400 MHz, CDCl<sub>3</sub>) of compound **2i**

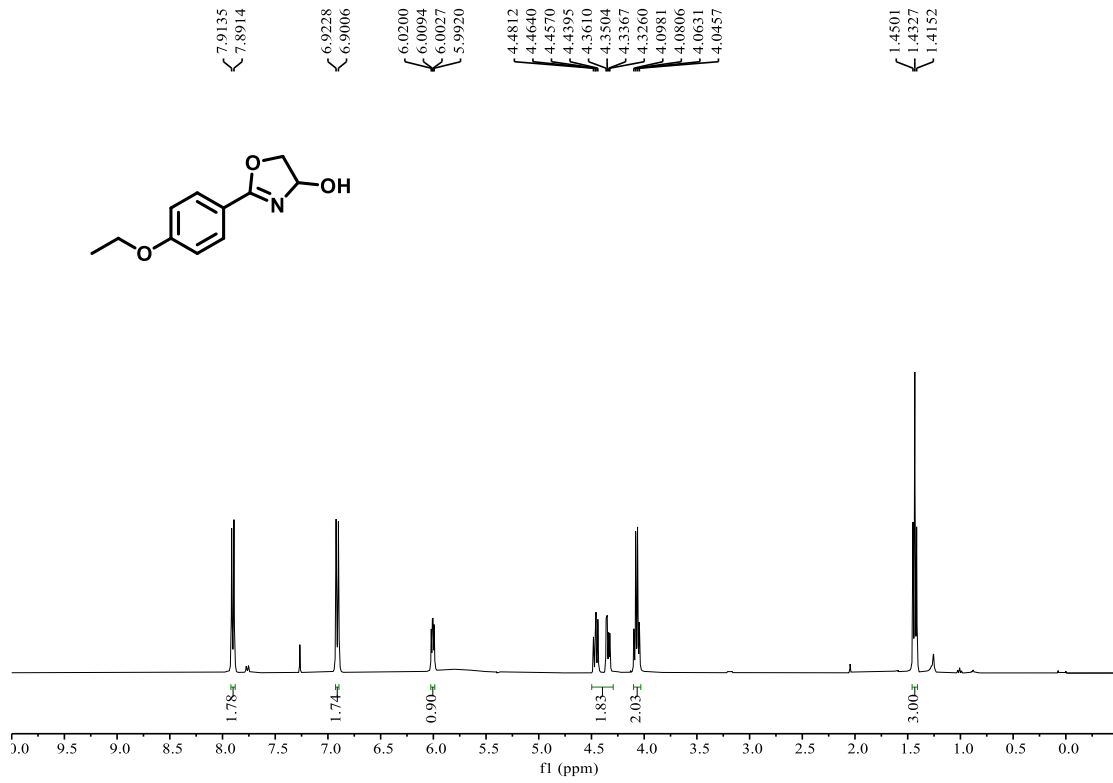

<sup>13</sup>C NMR (151 MHz, CDCl<sub>3</sub>) of compound **2i**

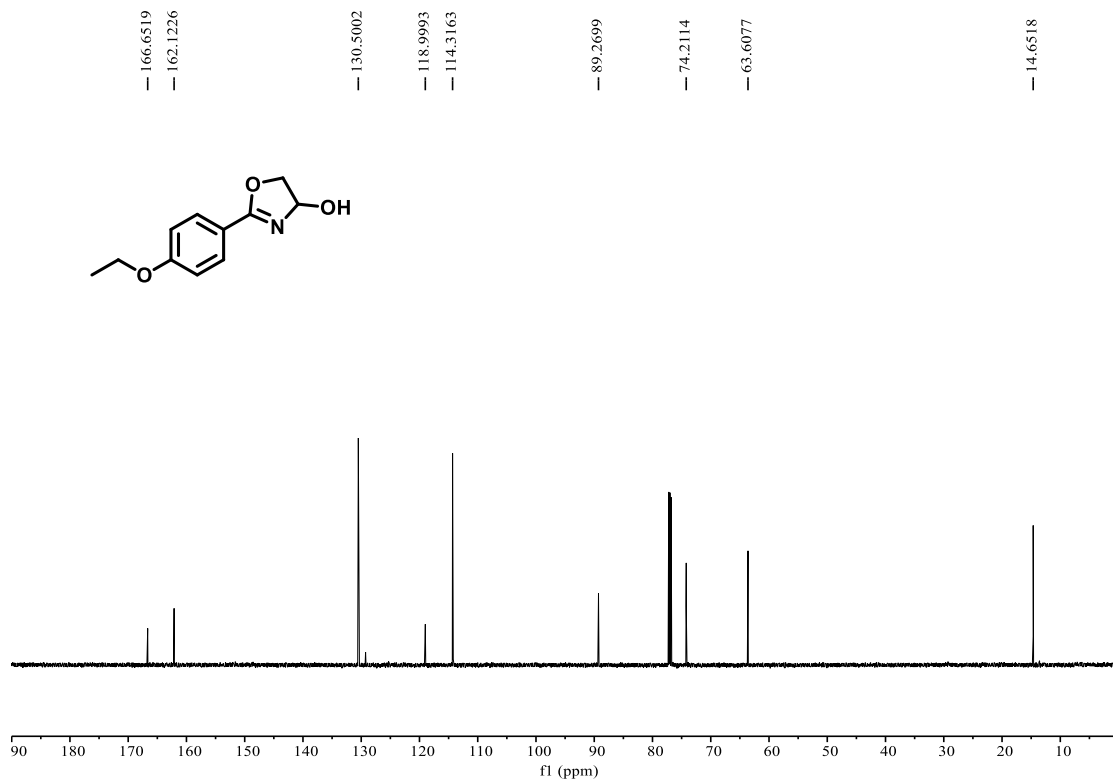

<sup>1</sup>H NMR (400 MHz, CDCl<sub>3</sub>) of compound **2j**

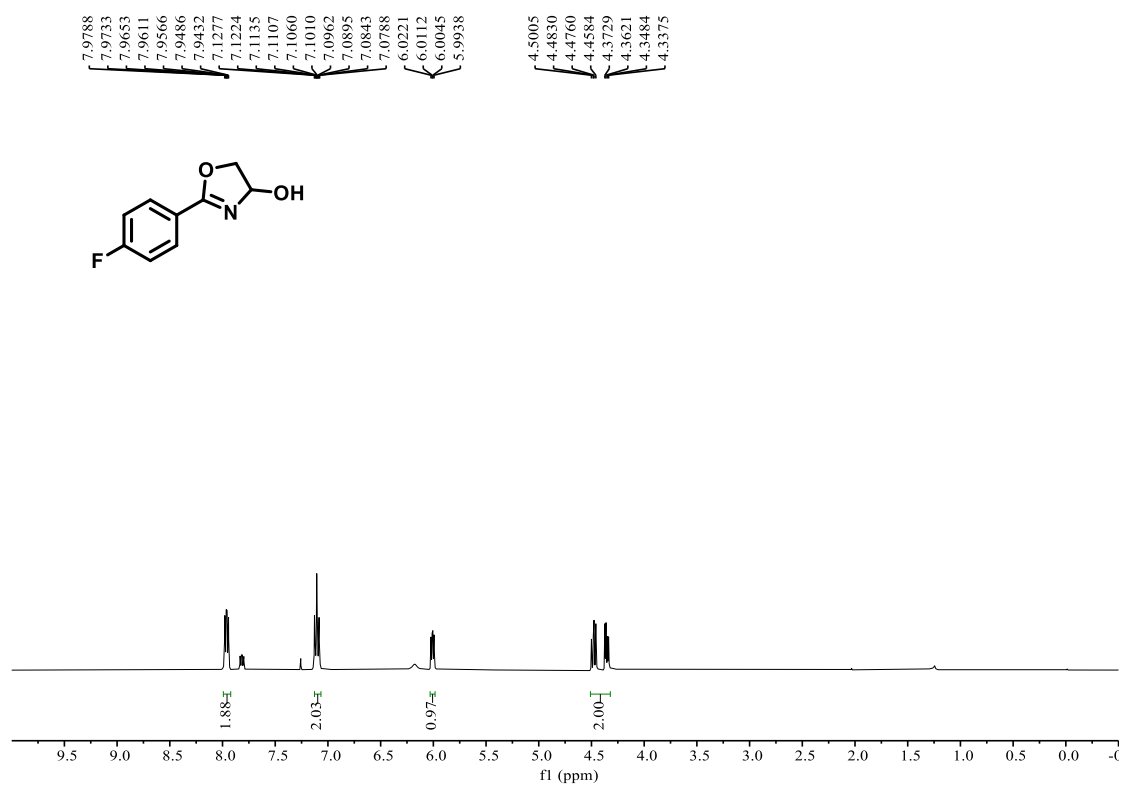

<sup>19</sup>F NMR (376 MHz, CDCl<sub>3</sub>) of compound **2j**

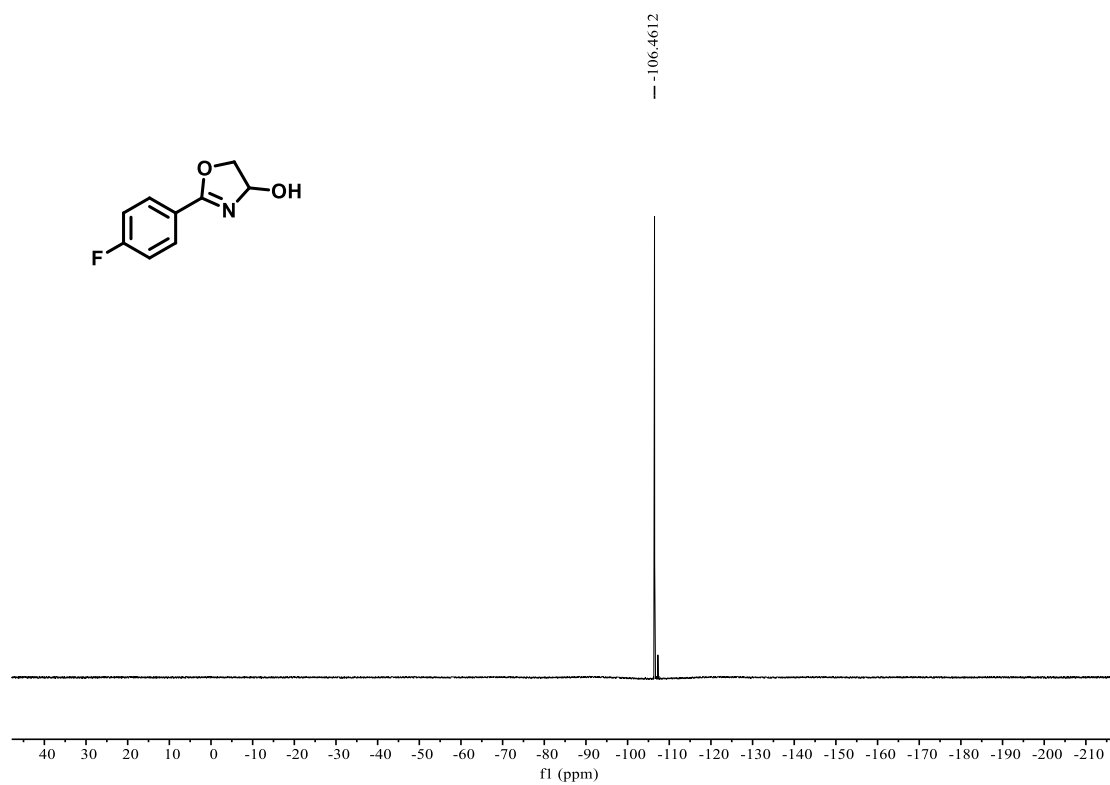

<sup>13</sup>C NMR (151 MHz, CDCl<sub>3</sub>) of compound **2j**

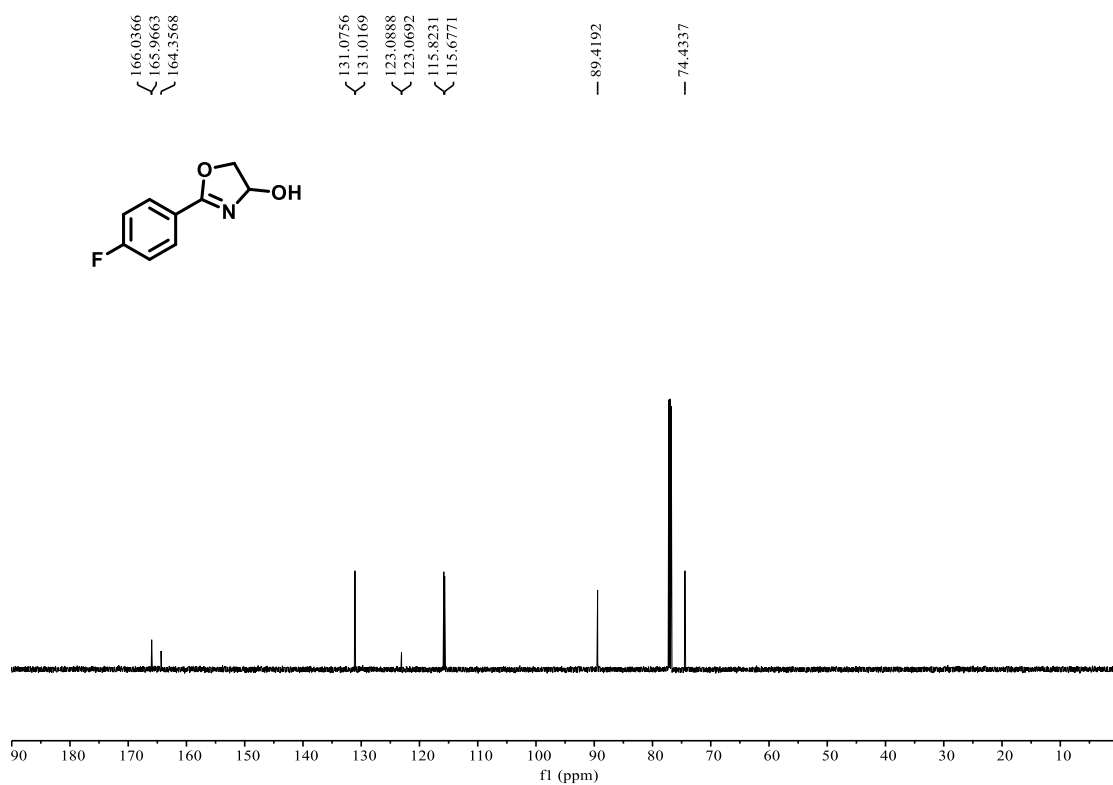

<sup>1</sup>H NMR (400 MHz, CDCl<sub>3</sub>) of compound **2k**

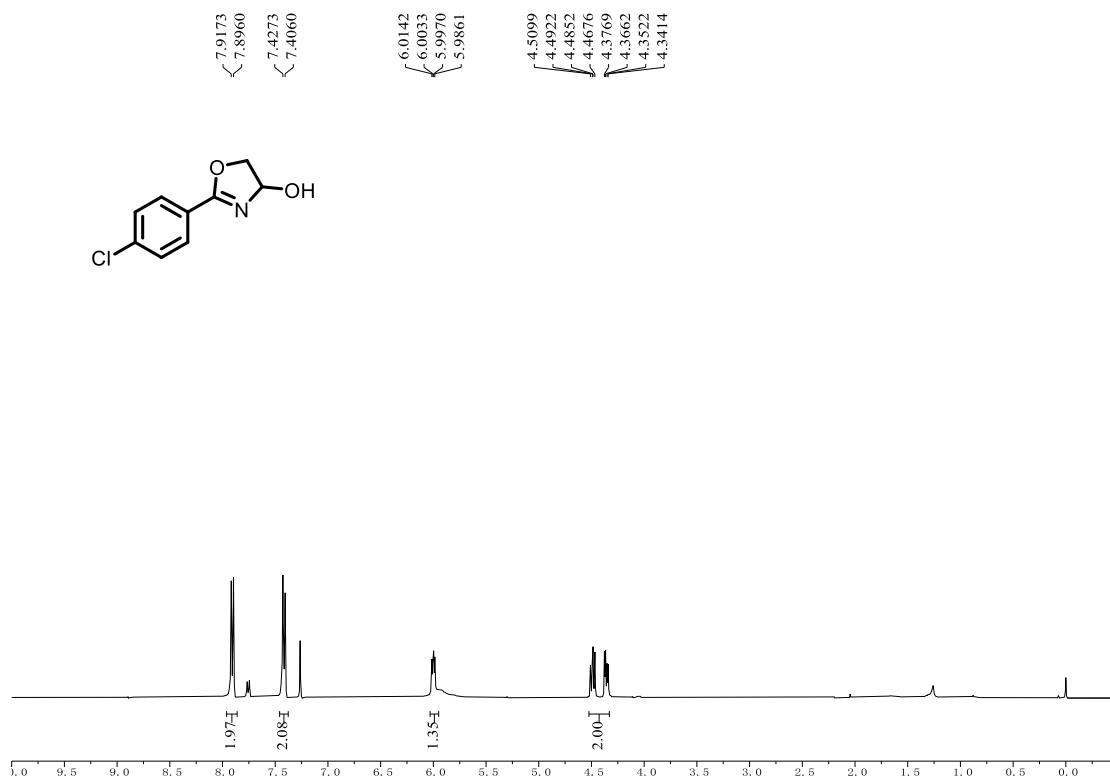

<sup>13</sup>C NMR (151 MHz, CDCl<sub>3</sub>) of compound **2k**

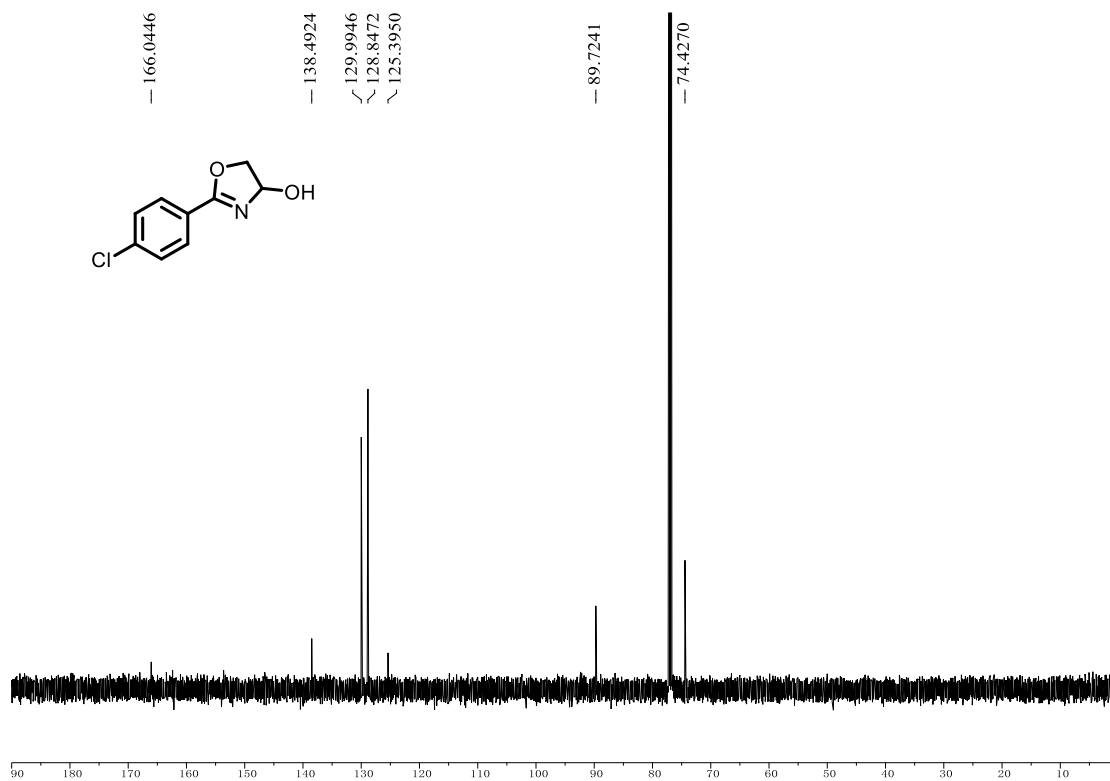

<sup>1</sup>H NMR (400 MHz, CDCl<sub>3</sub>) of compound **21**

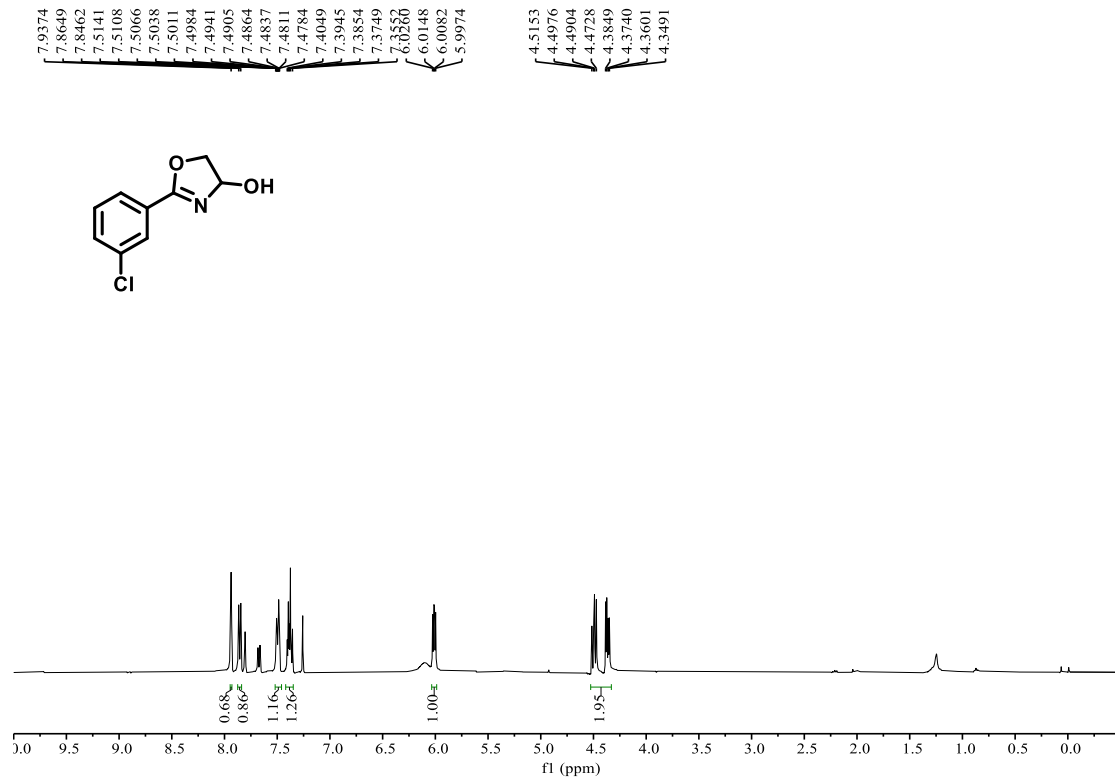

<sup>13</sup>C NMR (151 MHz, CDCl<sub>3</sub>) of compound **21**

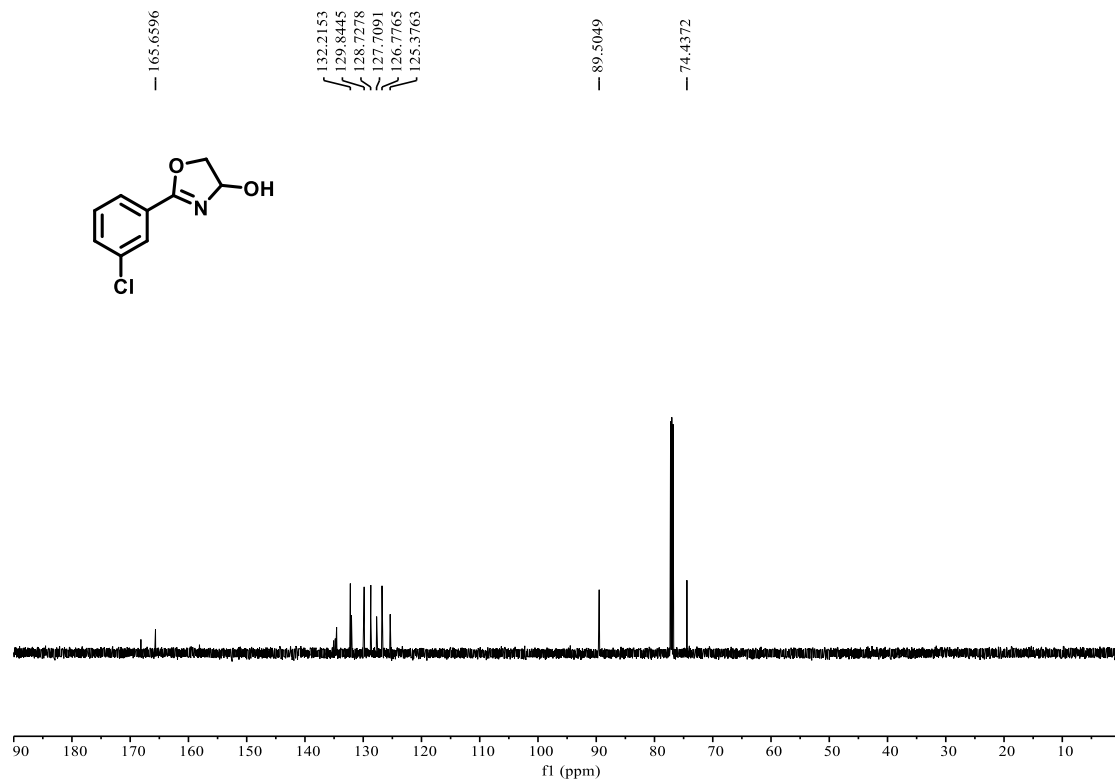

<sup>1</sup>H NMR (400 MHz, CDCl<sub>3</sub>) of compound **2m**

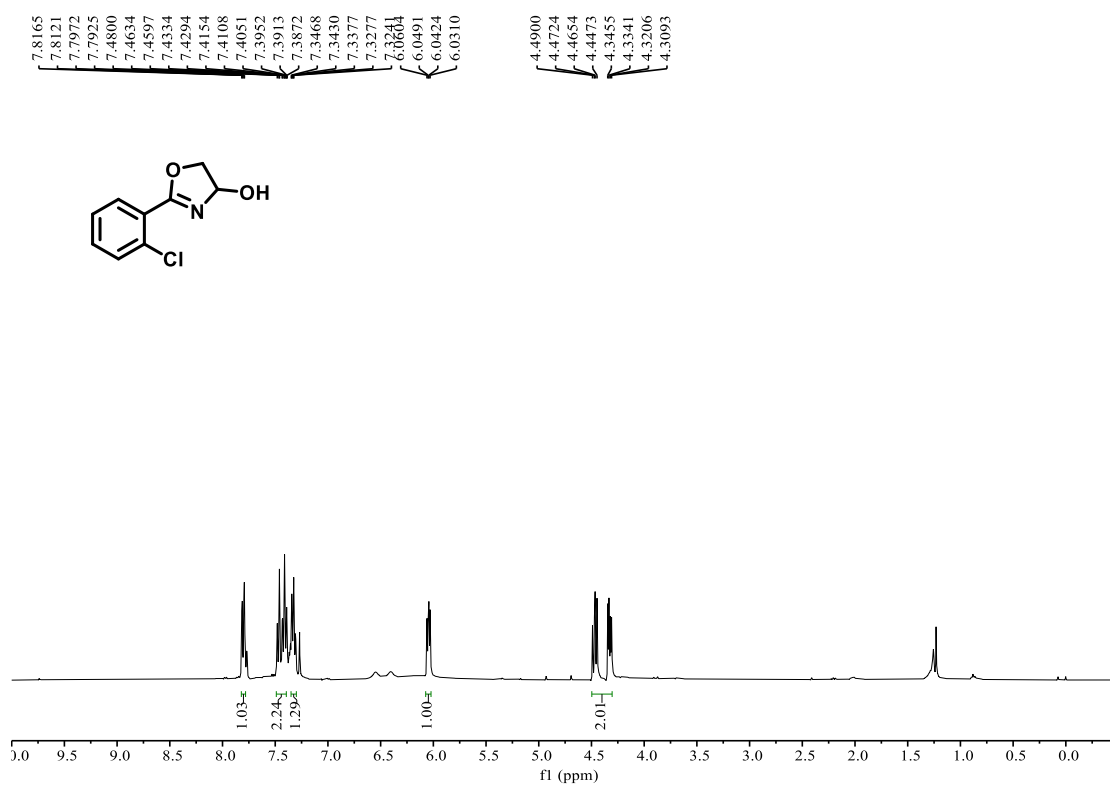

<sup>13</sup>C NMR (151 MHz, CDCl<sub>3</sub>) of compound **2m**

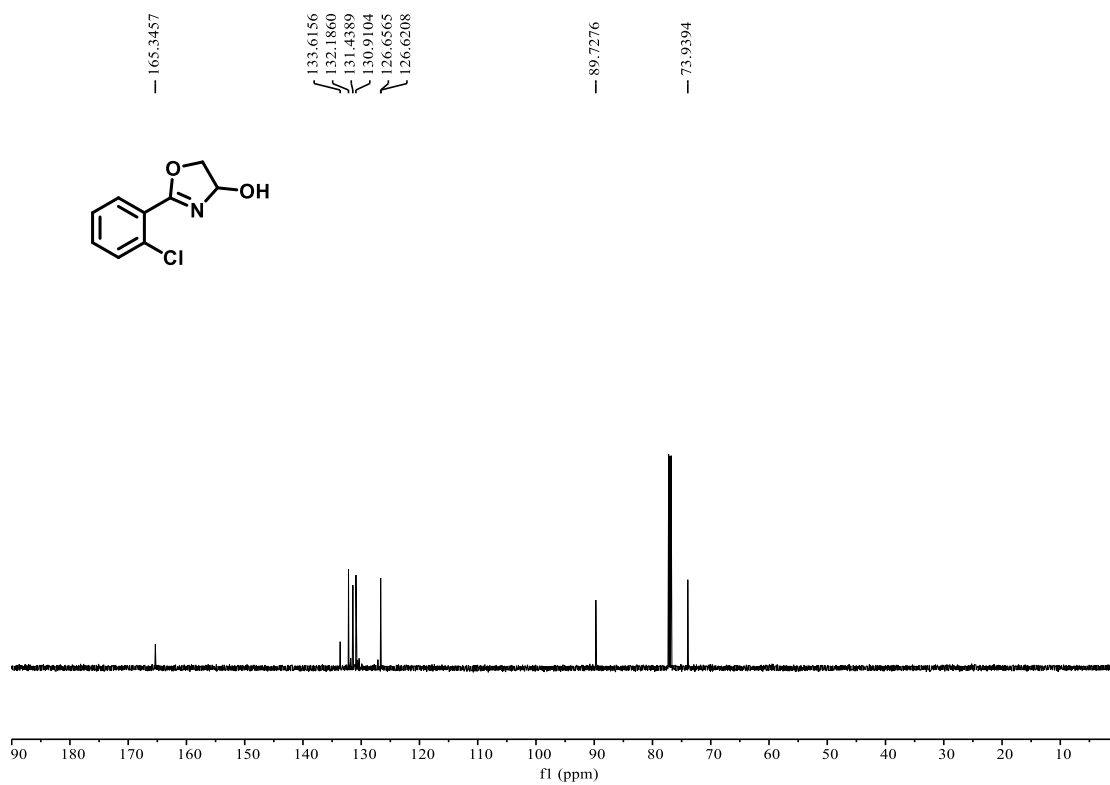



<sup>1</sup>H NMR (400 MHz, DMSO-*d*<sub>6</sub>) of compound **2n**

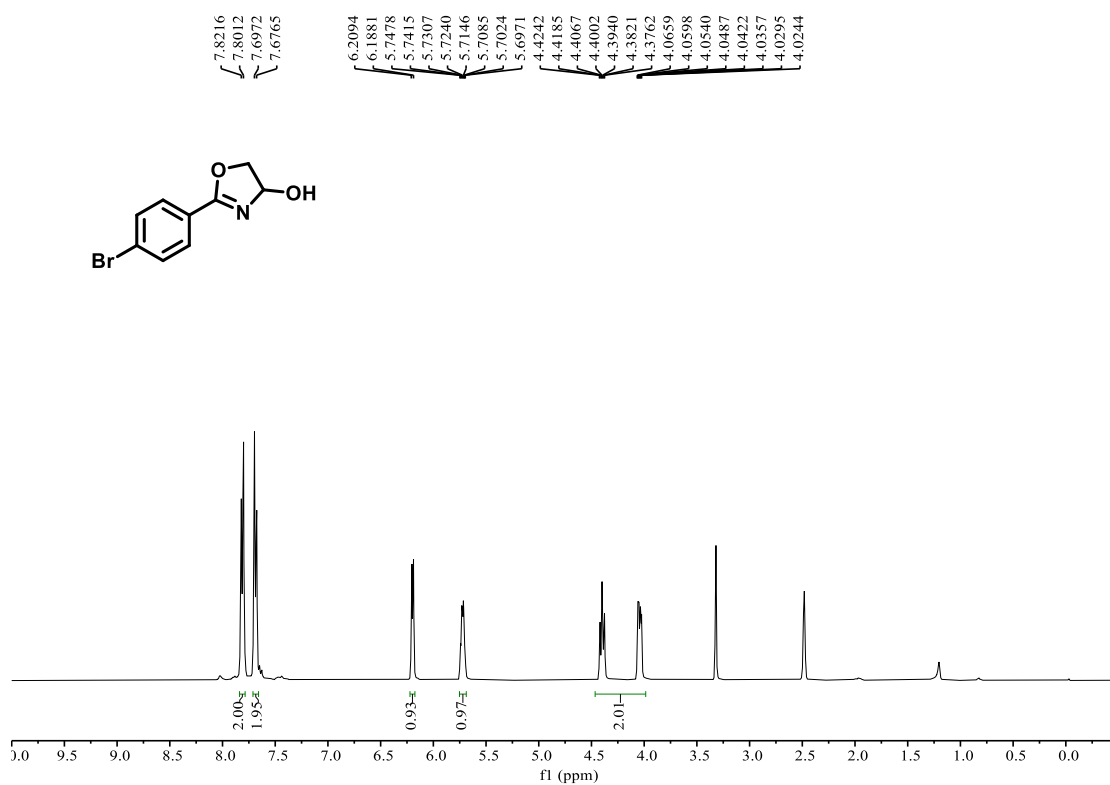

<sup>13</sup>C NMR (151 MHz, DMSO-*d*<sub>6</sub>) of compound **2n**

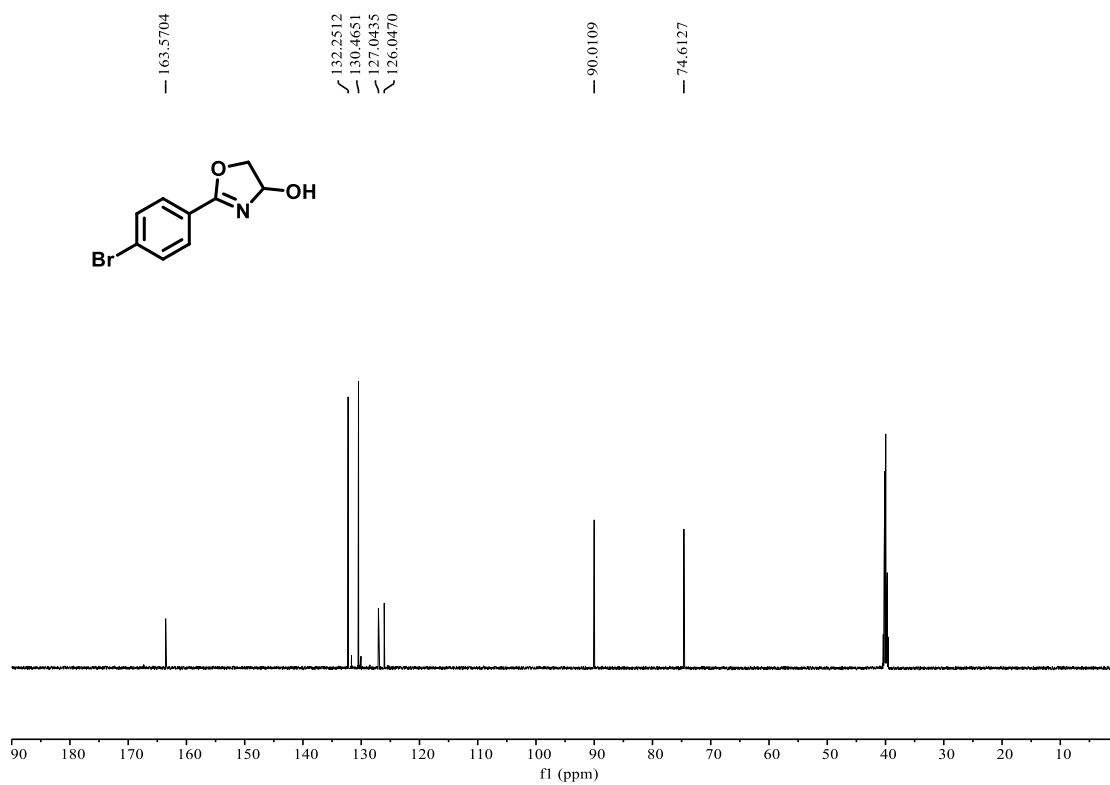

<sup>1</sup>H NMR (400 MHz, CDCl<sub>3</sub>) of compound **2o**

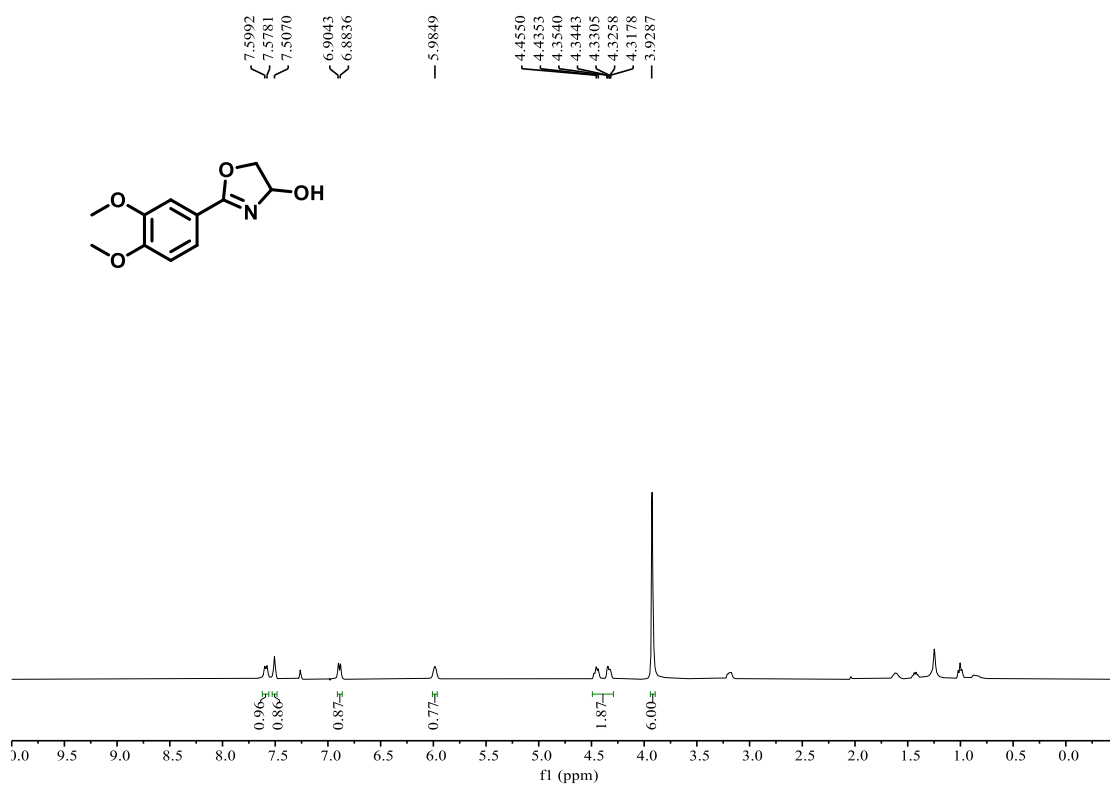

<sup>13</sup>C NMR (151 MHz, CDCl<sub>3</sub>) of compound **2o**

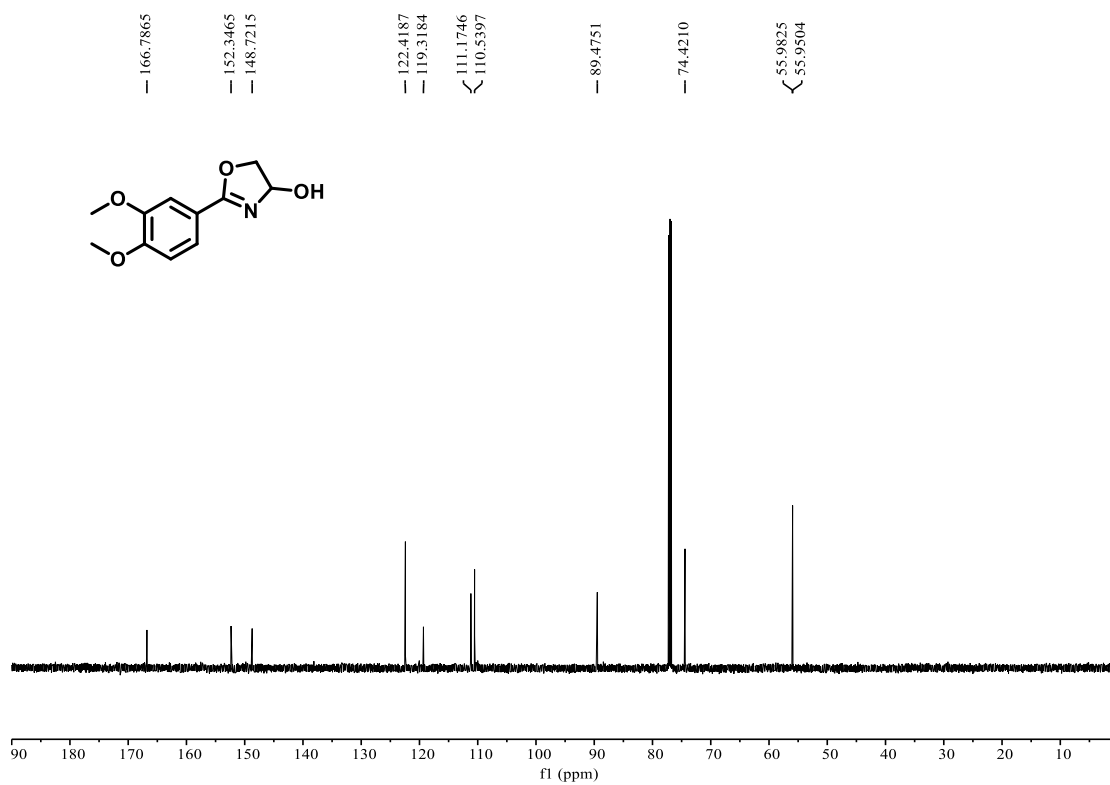

<sup>1</sup>H NMR (400 MHz, CDCl<sub>3</sub>) of compound **2p**

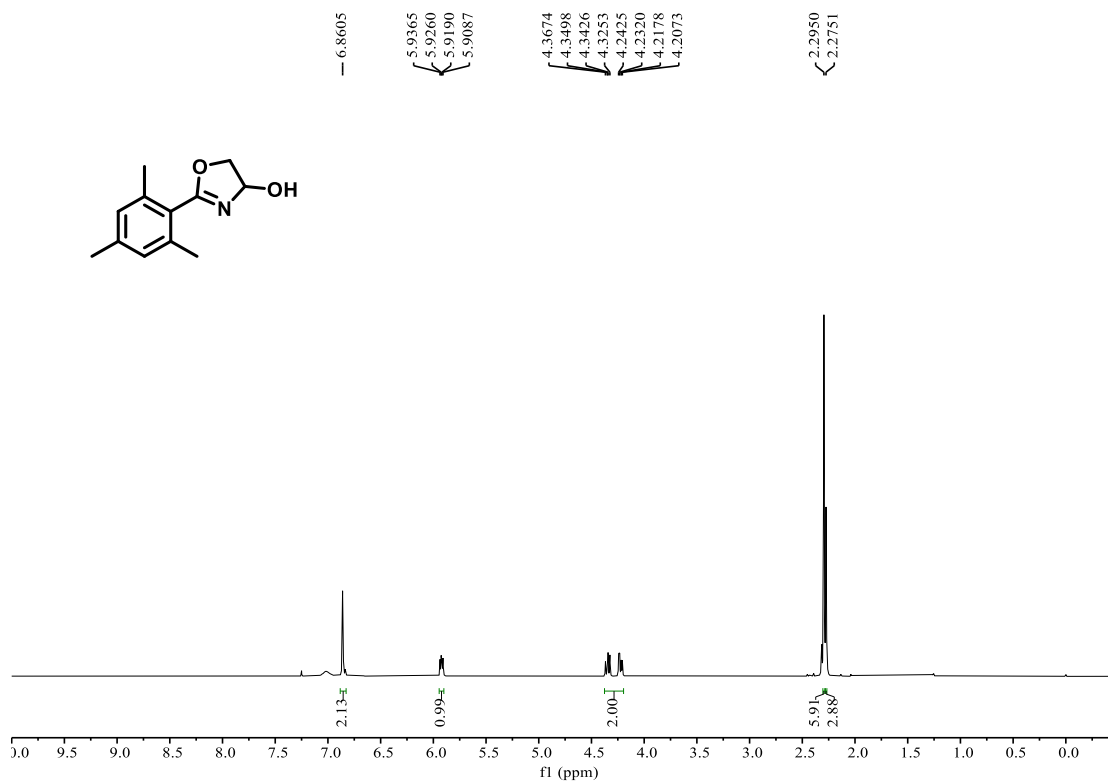

<sup>13</sup>C NMR (151 MHz, CDCl<sub>3</sub>) of compound **2p**

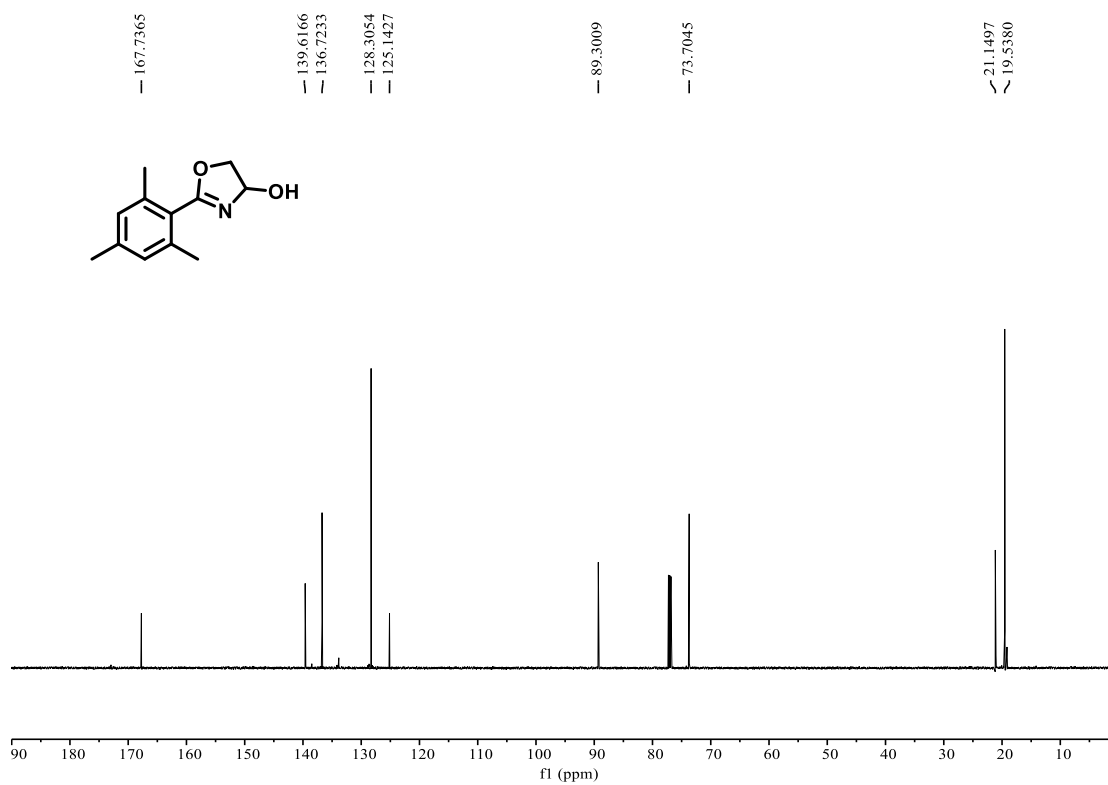

<sup>1</sup>H NMR (400 MHz, DMSO-*d*<sub>6</sub>) of compound **2q**

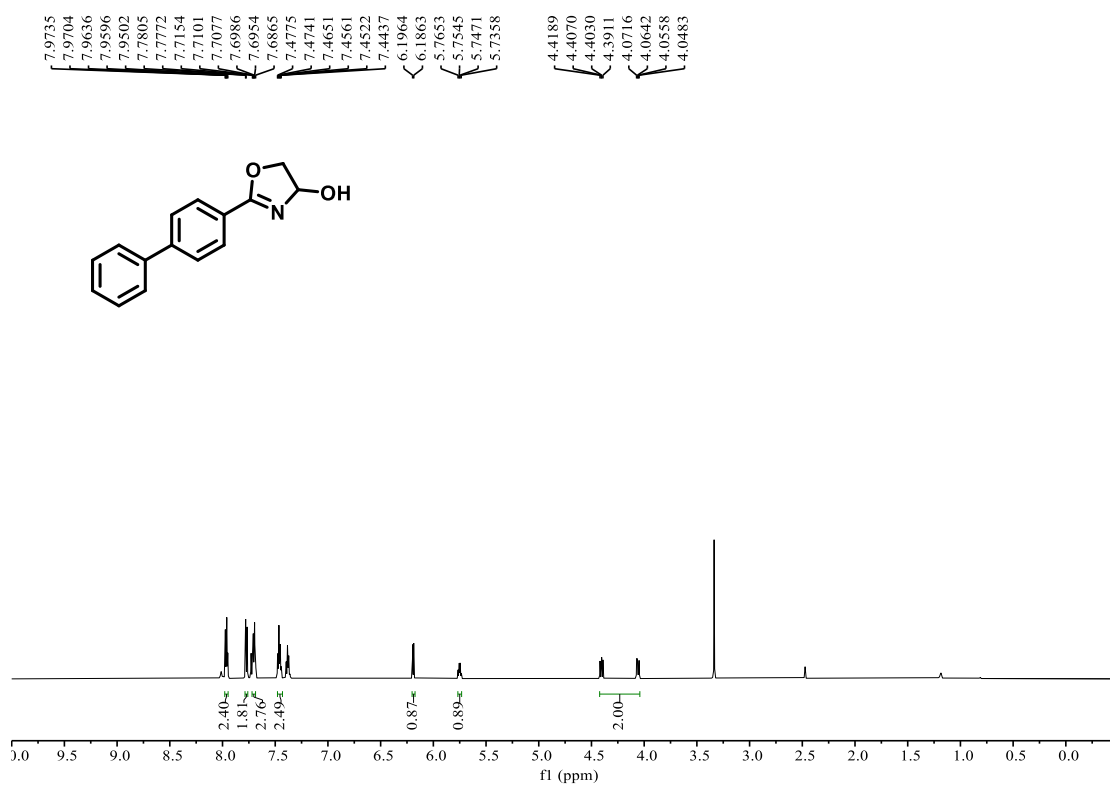

<sup>13</sup>C NMR (151 MHz, DMSO-*d*<sub>6</sub>) of compound **2q**

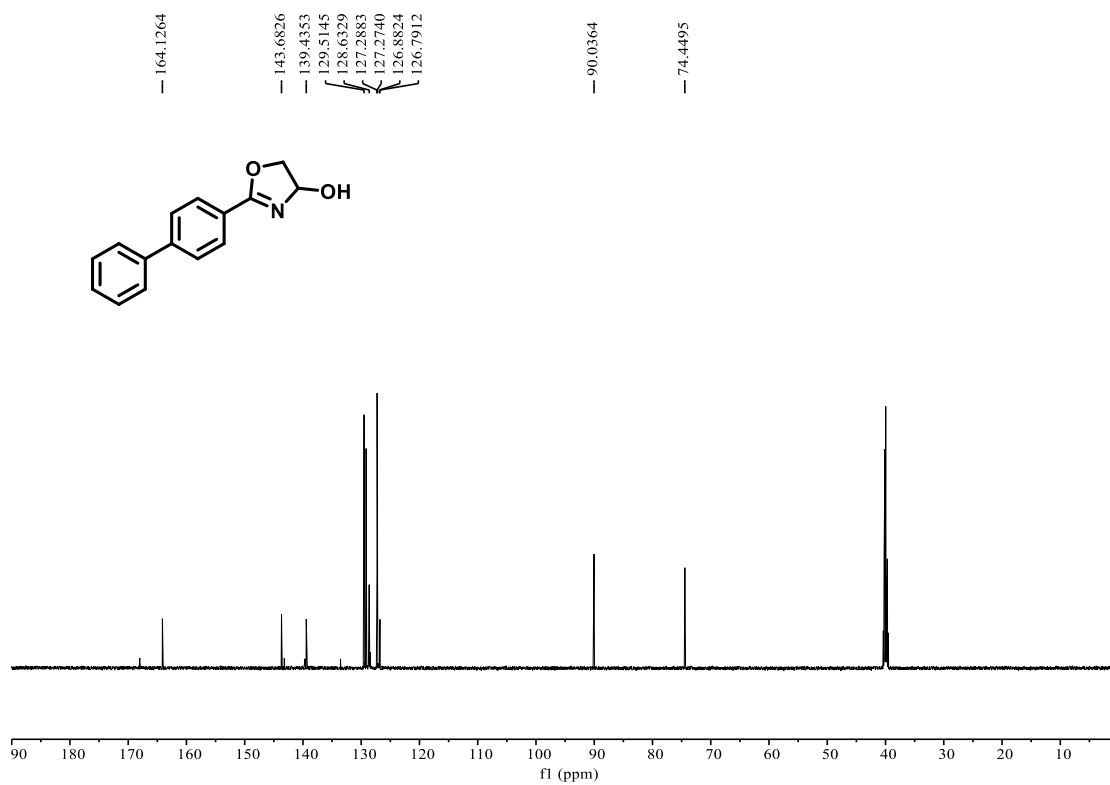

<sup>1</sup>H NMR (400 MHz, CDCl<sub>3</sub>) of compound **2r**

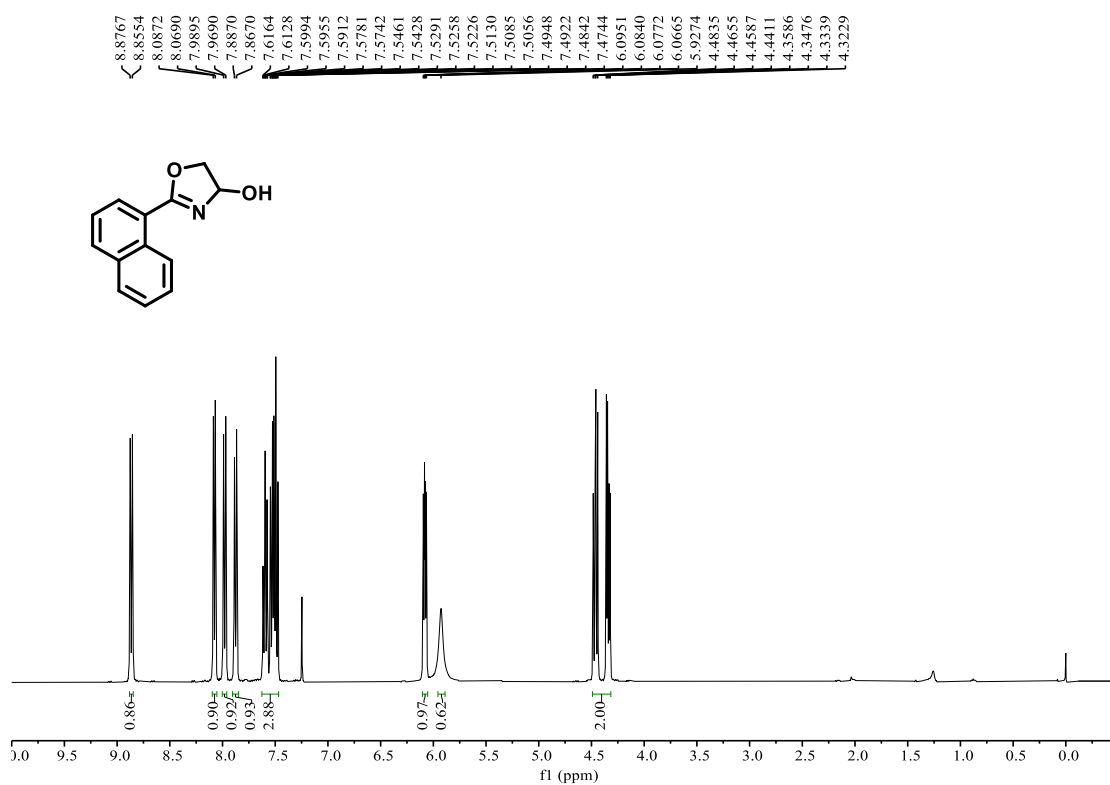

<sup>13</sup>C NMR (151 MHz, CDCl<sub>3</sub>) of compound **2r**

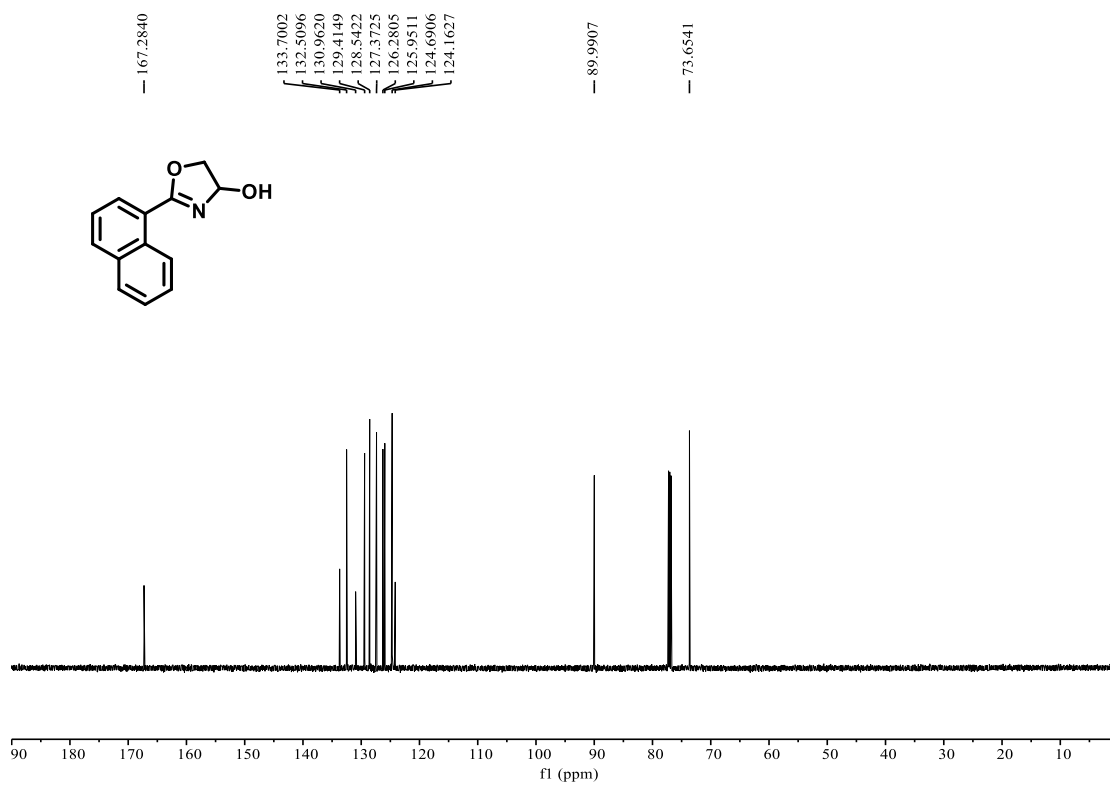

<sup>1</sup>H NMR (400 MHz, CDCl<sub>3</sub>) of compound **2s**

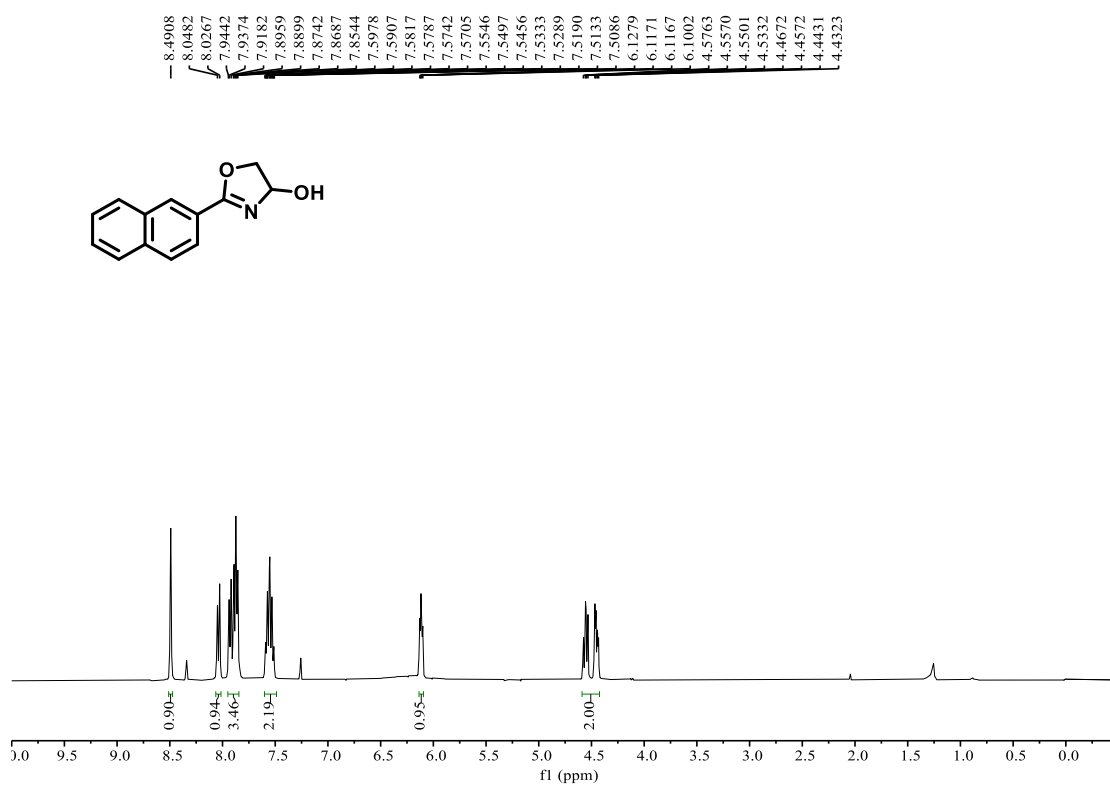

<sup>13</sup>C NMR (151 MHz, CDCl<sub>3</sub>) of compound **2s**

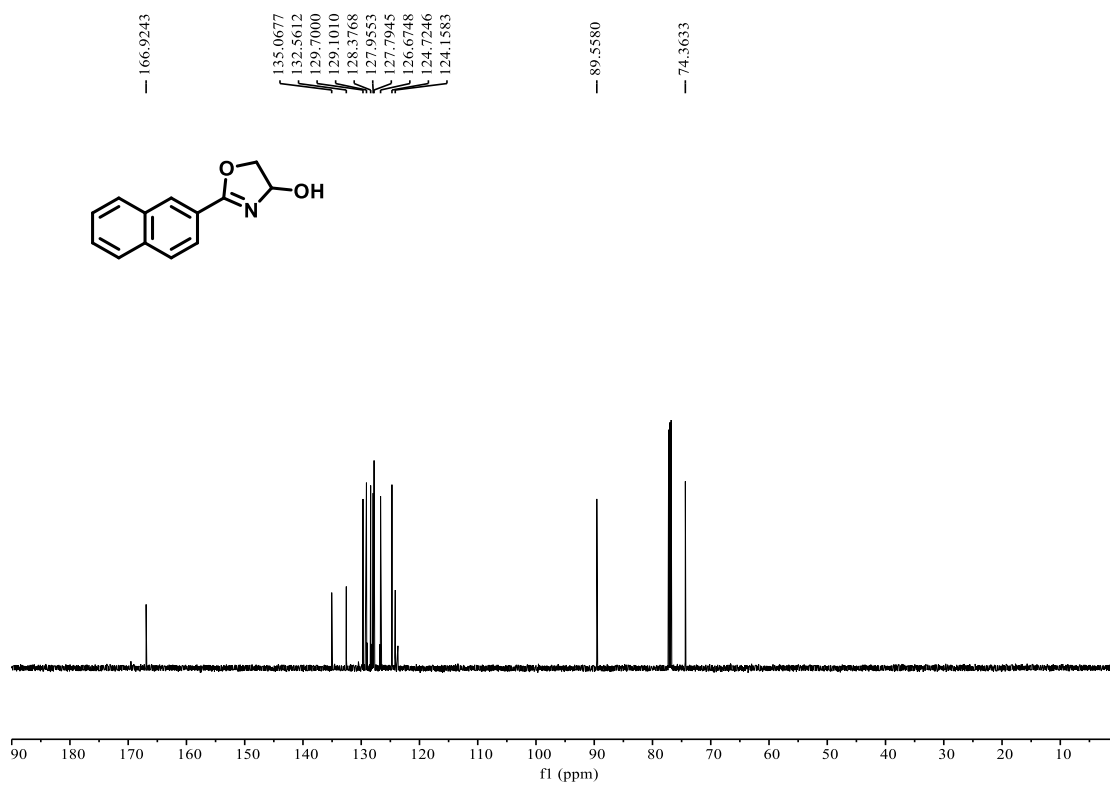

<sup>1</sup>H NMR (600 MHz, CDCl<sub>3</sub>) of compound **2t**

7.5866  
7.5851  
7.5836  
7.5821  
7.0667  
7.0609  
6.5009  
6.4979  
6.4950  
6.4921  
6.0183  
6.0112  
6.0068  
5.9999  
4.4438  
4.4322  
4.4276  
4.4163  
4.3440  
4.3370  
4.3279  
4.3209

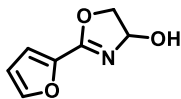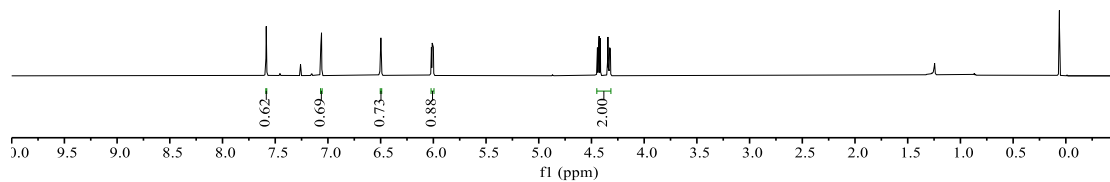

<sup>13</sup>C NMR (151 MHz, CDCl<sub>3</sub>) of compound **2t**

158.7272  
146.1043  
142.2346  
116.1871  
111.7499  
89.2513  
74.3972

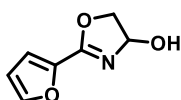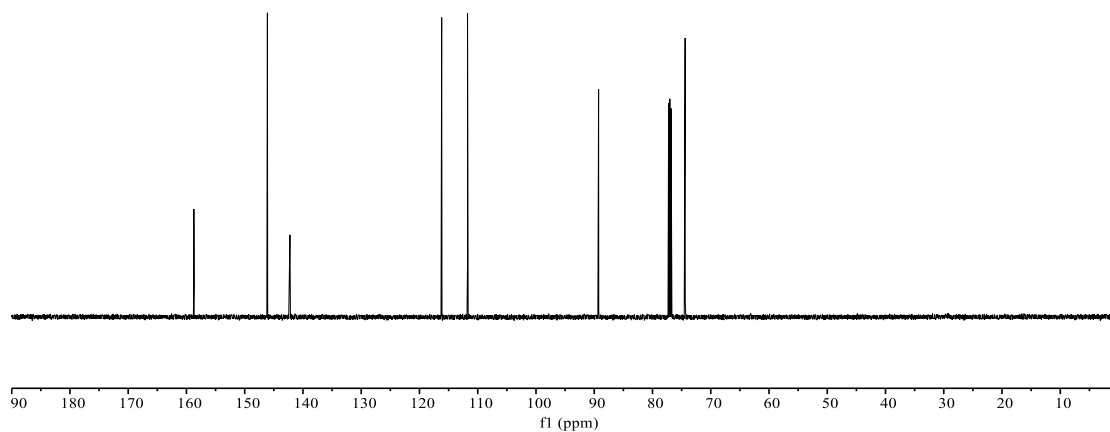

<sup>1</sup>H NMR (400 MHz, CDCl<sub>3</sub>) of compound **2u**

7.7073  
7.6980  
7.5217  
7.5099  
7.1102  
7.0995  
7.0883  
6.0142  
6.0037  
5.9971  
5.9863  
4.4935  
4.4763  
4.4692  
4.4520  
4.3833  
4.3728  
4.3592  
4.3484

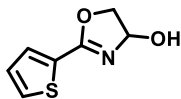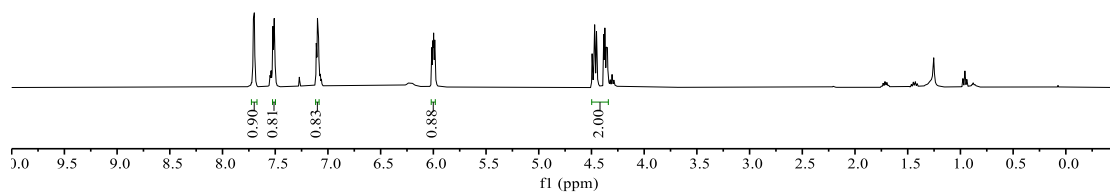

<sup>13</sup>C NMR (151 MHz, CDCl<sub>3</sub>) of compound **2u**

162.4445  
131.7759  
131.0904  
129.2603  
127.8720  
89.4123  
74.7193

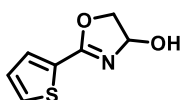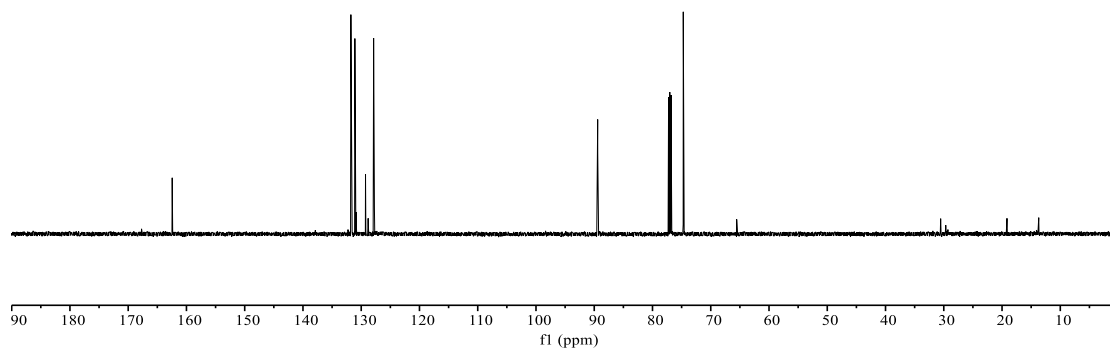



<sup>1</sup>H NMR (600 MHz, CDCl<sub>3</sub>) of compound **2v**

8.9580  
8.9551  
8.1984  
8.1944  
8.1845  
8.1805  
7.4264  
7.4126  
6.0231  
6.0159  
6.0114  
6.0041  
4.5312  
4.5194  
4.5147  
4.5031  
4.3943  
4.3869  
4.3777  
4.3705

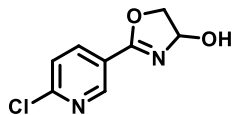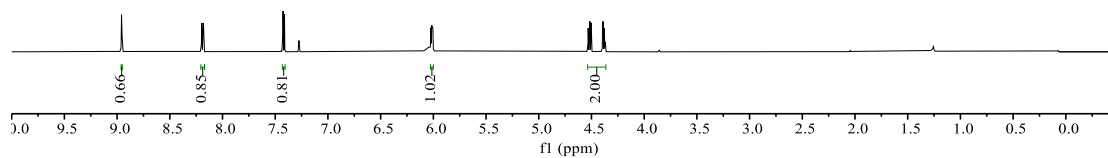

<sup>13</sup>C NMR (151 MHz, CDCl<sub>3</sub>) of compound **2v**

164.1886  
154.9719  
149.9747  
138.5282  
124.2883  
122.0576  
89.4159  
74.5815

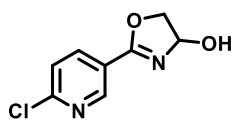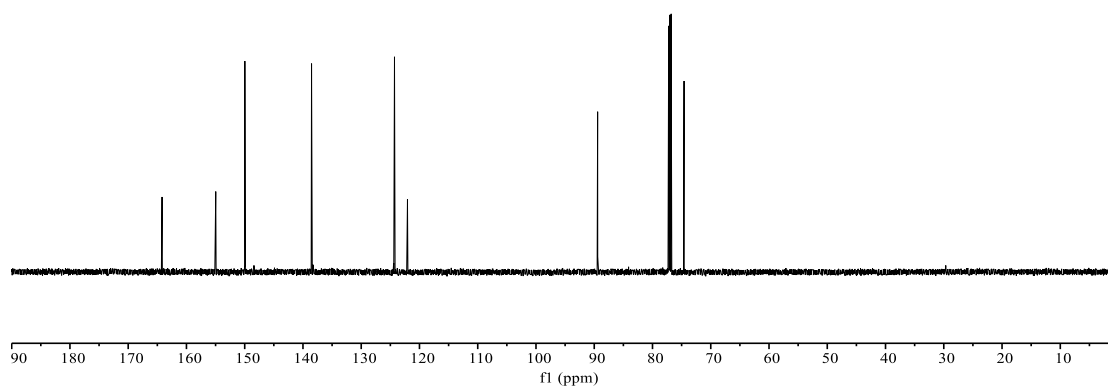

<sup>1</sup>H NMR (400 MHz, CDCl<sub>3</sub>) of compound **2w**

8.9624  
8.9584  
8.2060  
8.2000  
8.1852  
8.1792  
7.4310  
7.4102  
6.0259  
6.0147  
6.0082  
5.9975  
5.7455  
4.5366  
4.5190  
4.5116  
4.4941  
4.3985  
4.3875  
4.3735  
4.3626

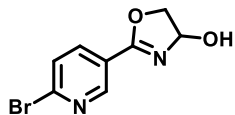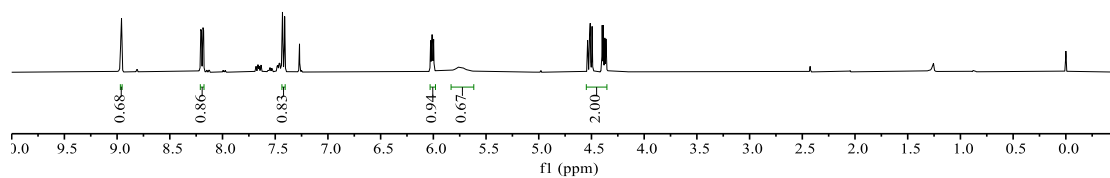

<sup>13</sup>C NMR (151 MHz, CDCl<sub>3</sub>) of compound **2w**

164.2037  
154.9756  
149.9907  
138.5282  
124.2770  
122.0820  
89.5117  
74.5855

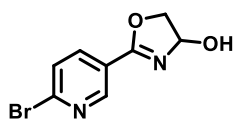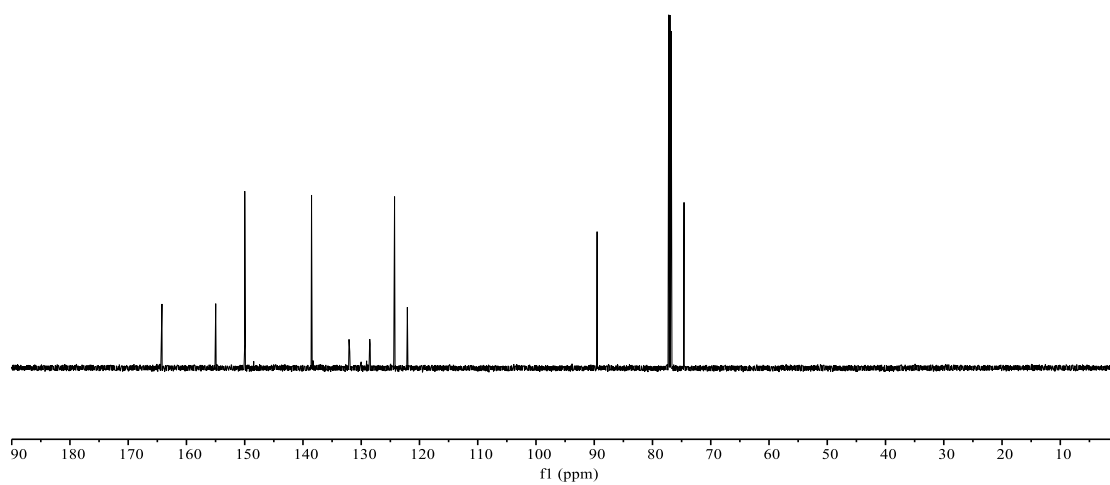

<sup>1</sup>H NMR (400 MHz, CDCl<sub>3</sub>) of compound **2x**

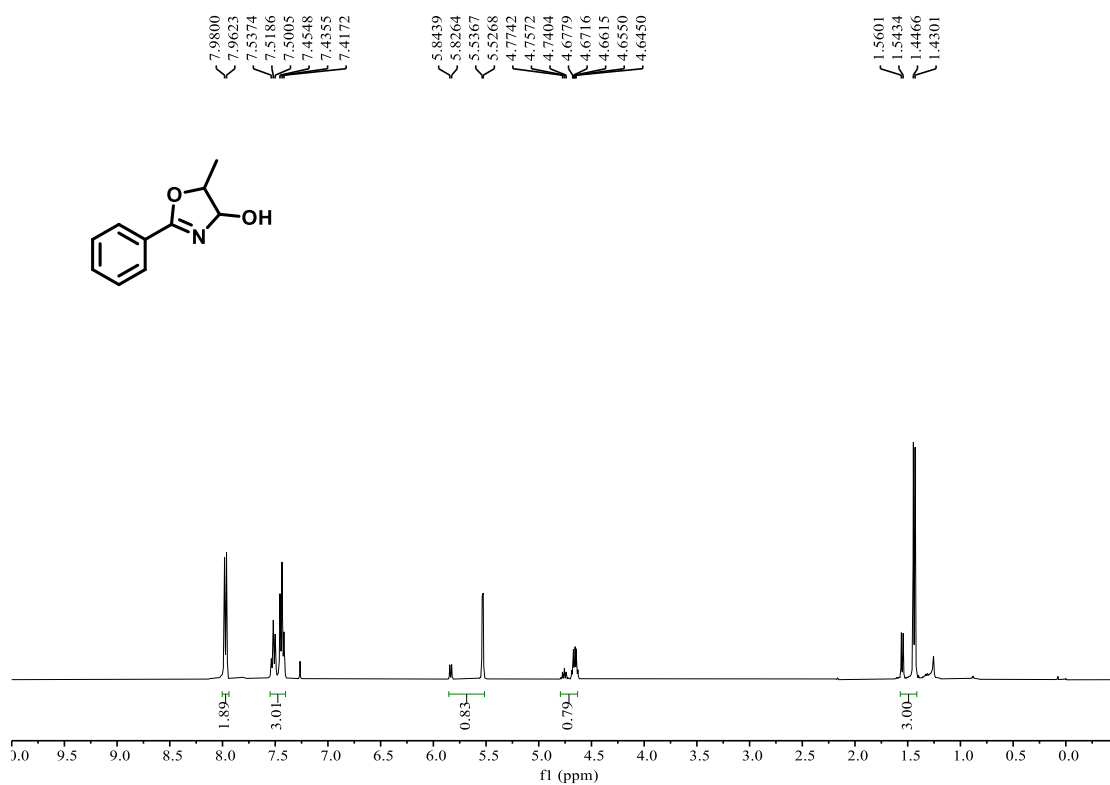

<sup>13</sup>C NMR (151 MHz, CDCl<sub>3</sub>) of compound **2x**

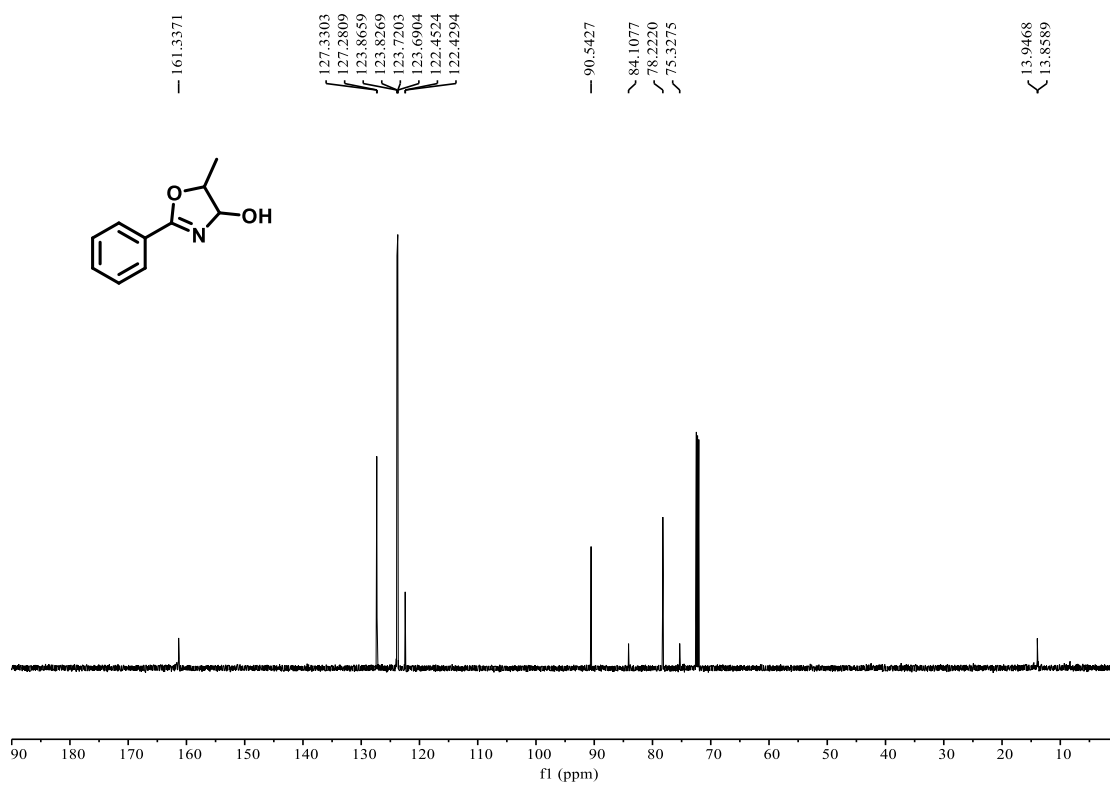

<sup>1</sup>H NMR (400 MHz, CDCl<sub>3</sub>) of compound **4a**

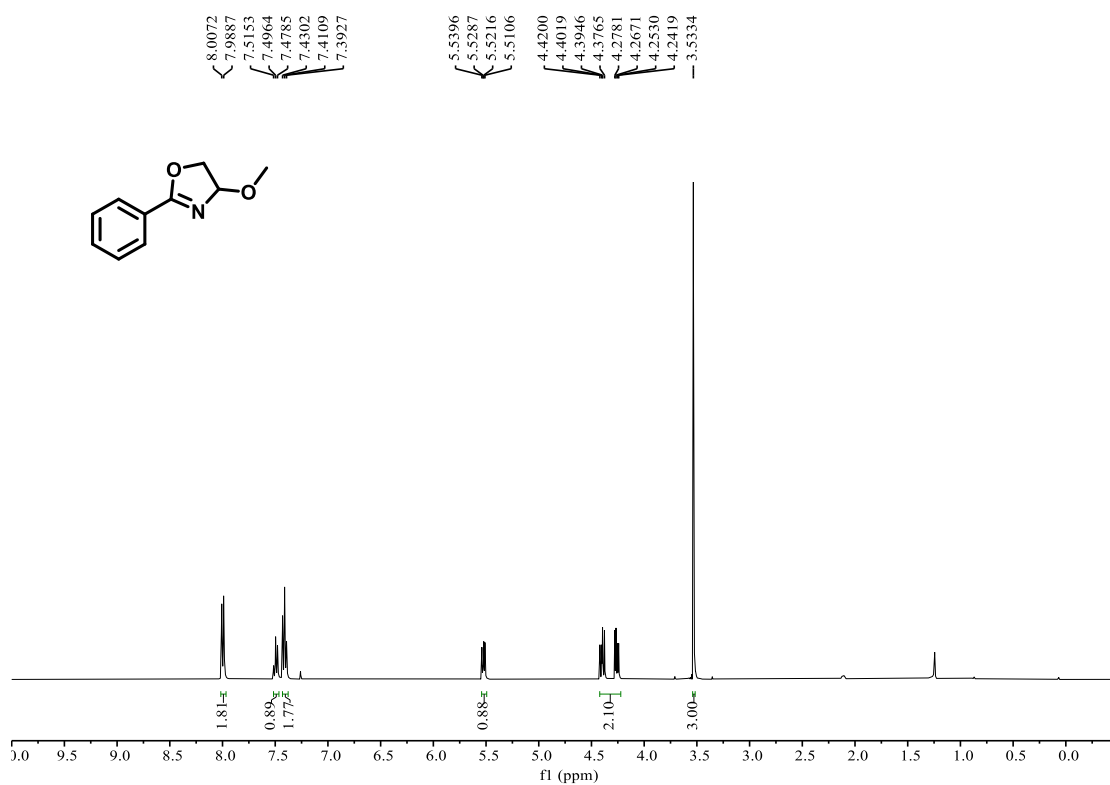

<sup>13</sup>C NMR (151 MHz, CDCl<sub>3</sub>) of compound **4a**

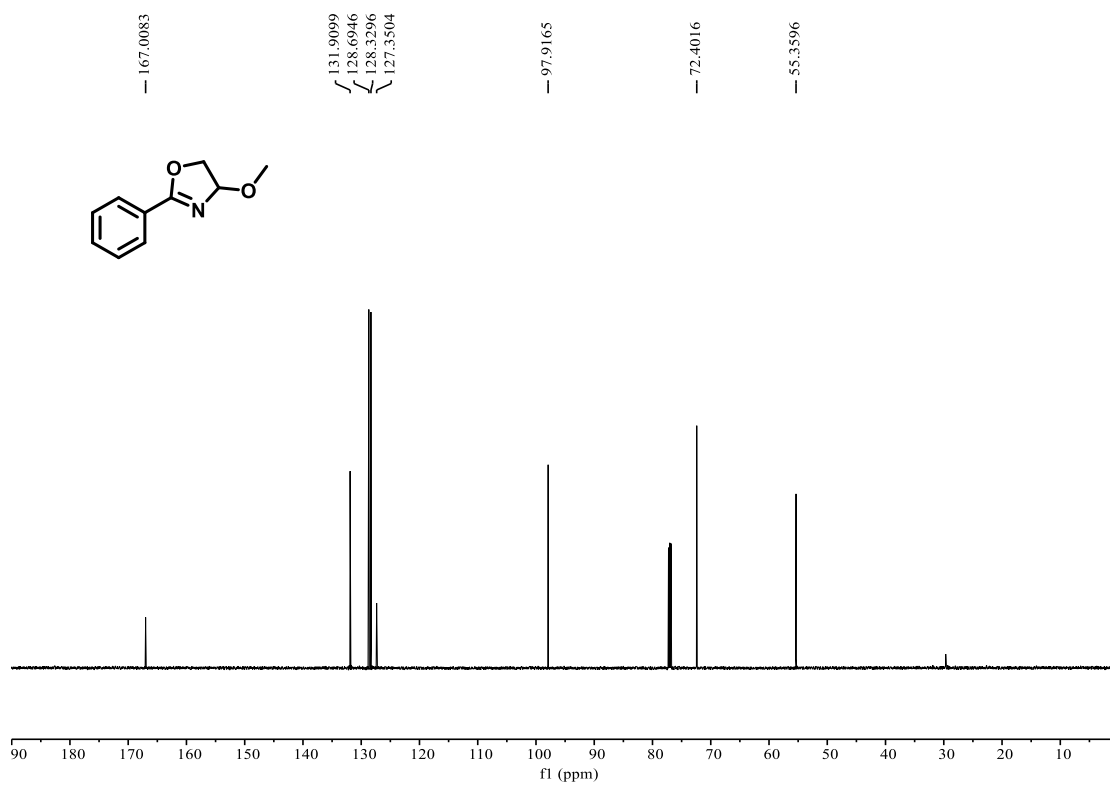

<sup>1</sup>H NMR (400 MHz, CDCl<sub>3</sub>) of compound **4b**

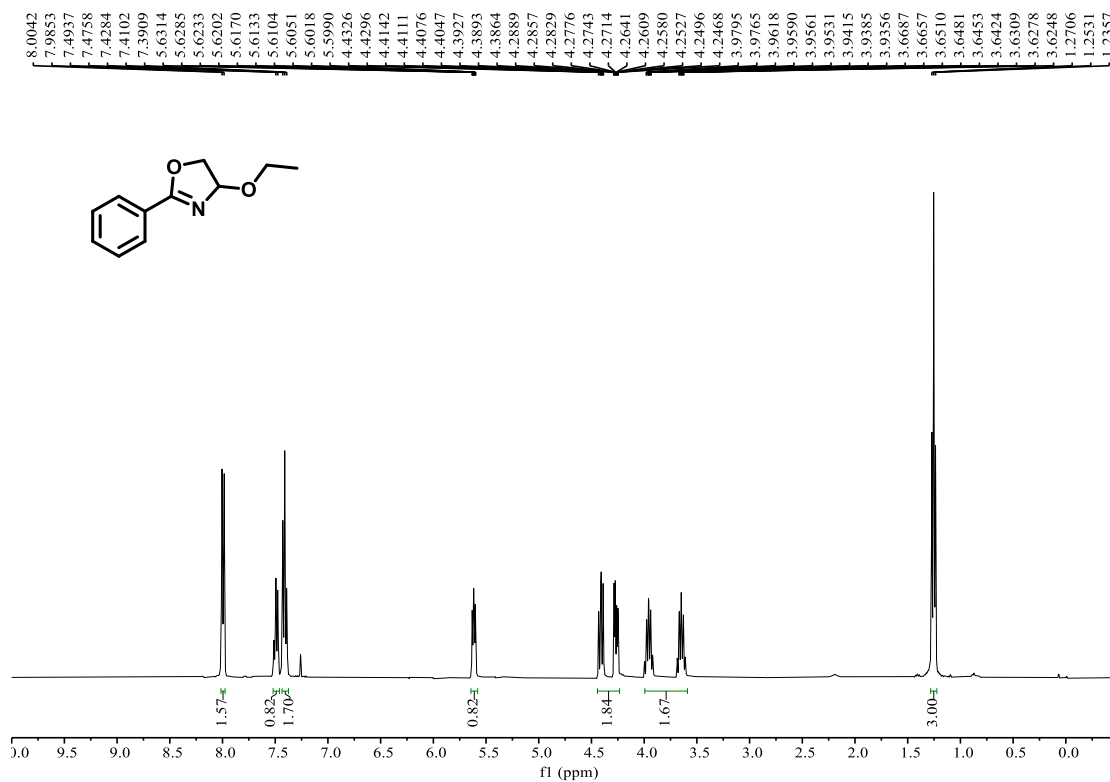

<sup>13</sup>C NMR (151 MHz, CDCl<sub>3</sub>) of compound **4b**

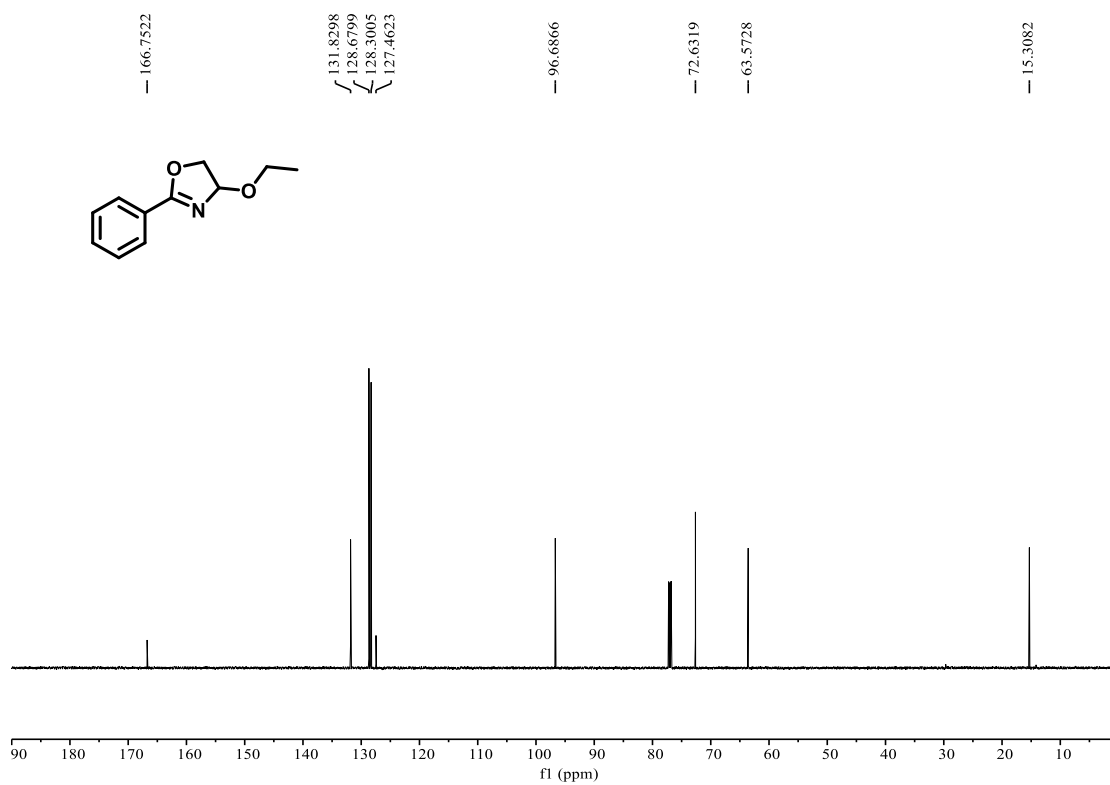

<sup>1</sup>H NMR (400 MHz, CDCl<sub>3</sub>) of compound 4c

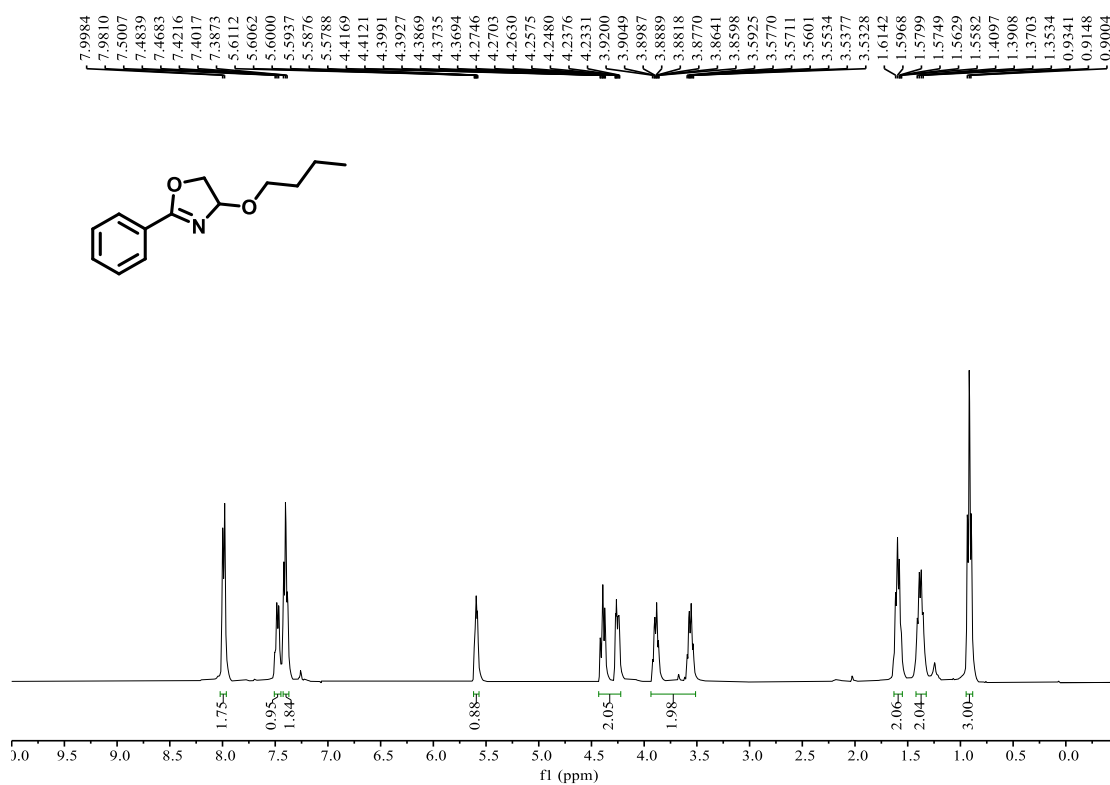

<sup>13</sup>C NMR (151 MHz, CDCl<sub>3</sub>) of compound 4c

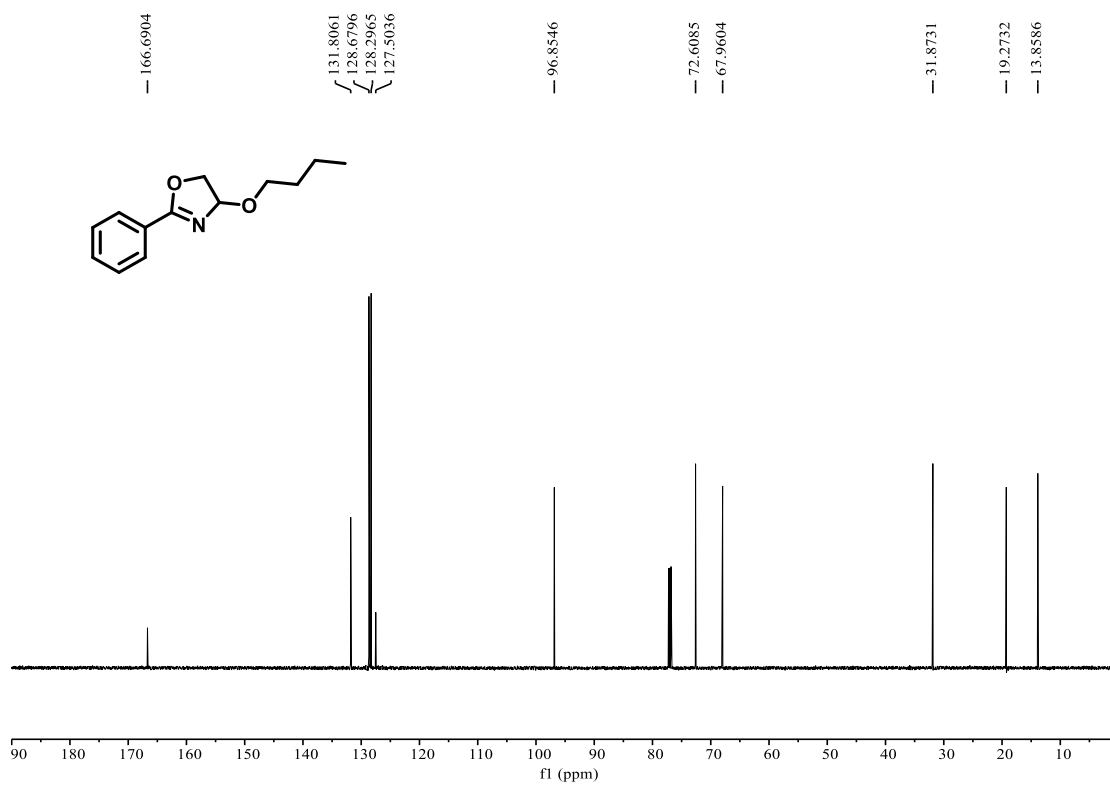

<sup>1</sup>H NMR (400 MHz, CDCl<sub>3</sub>) of compound **4d**

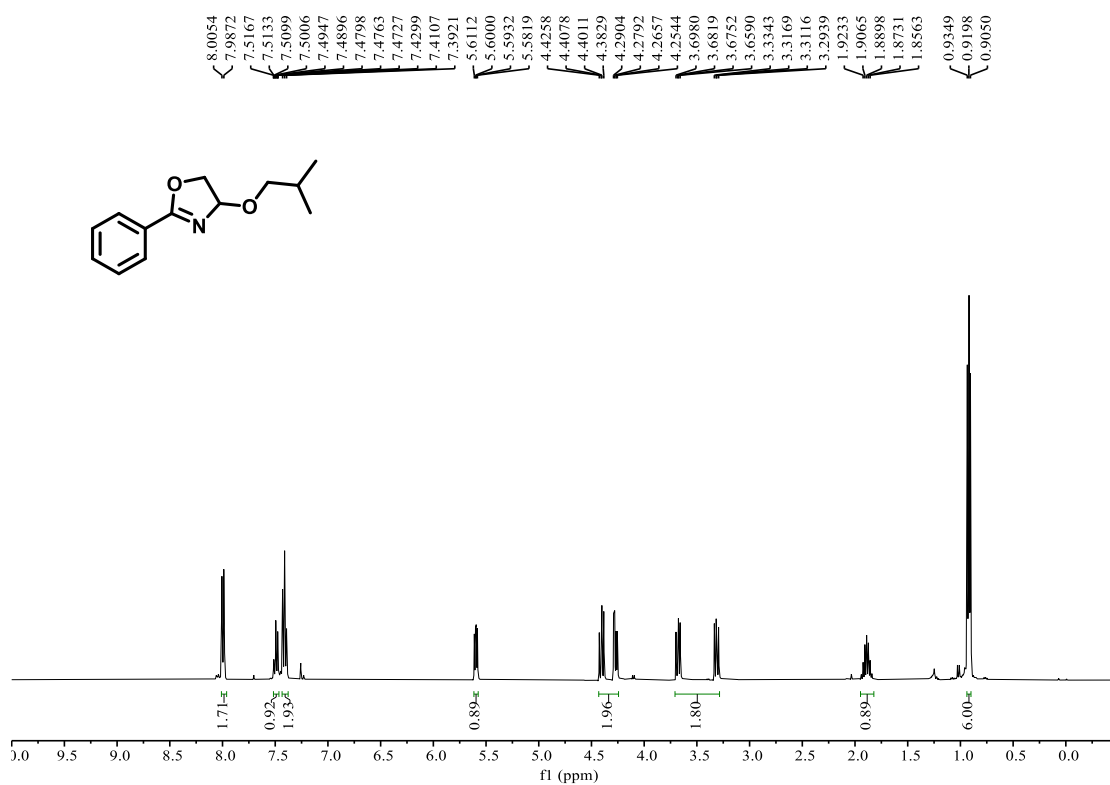

<sup>13</sup>C NMR (151 MHz, CDCl<sub>3</sub>) of compound **4d**

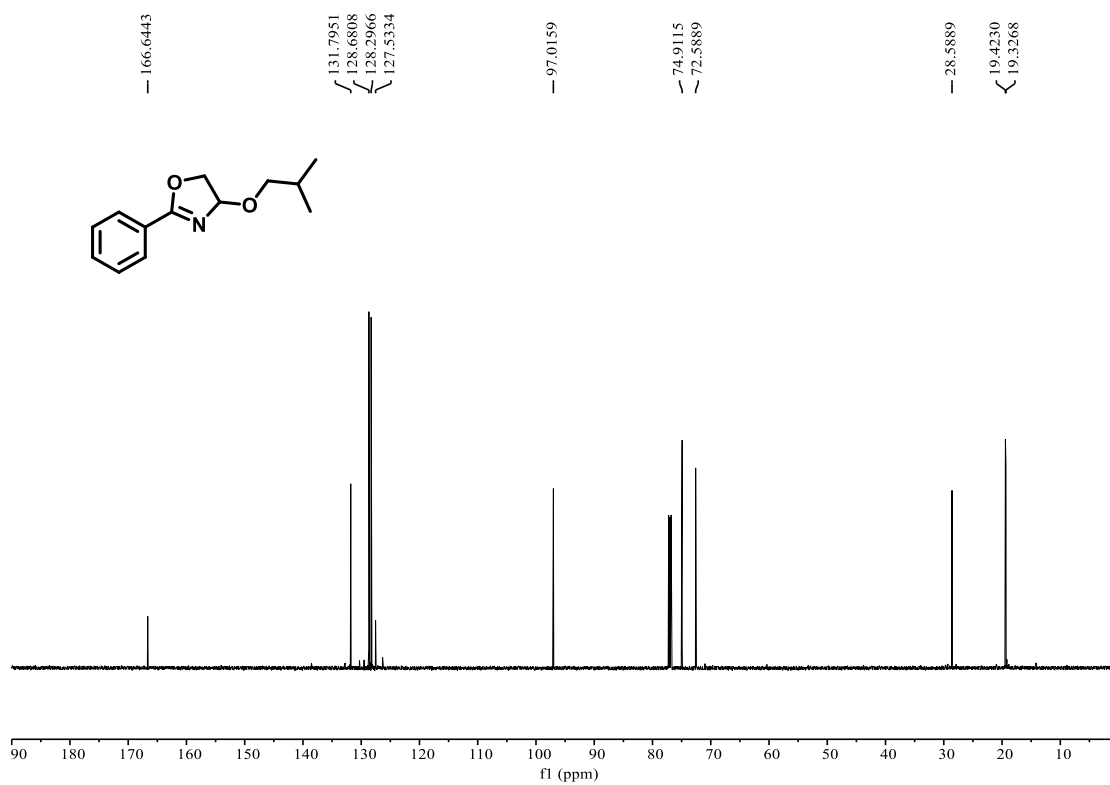

<sup>1</sup>H NMR (400 MHz, CDCl<sub>3</sub>) of compound 4e

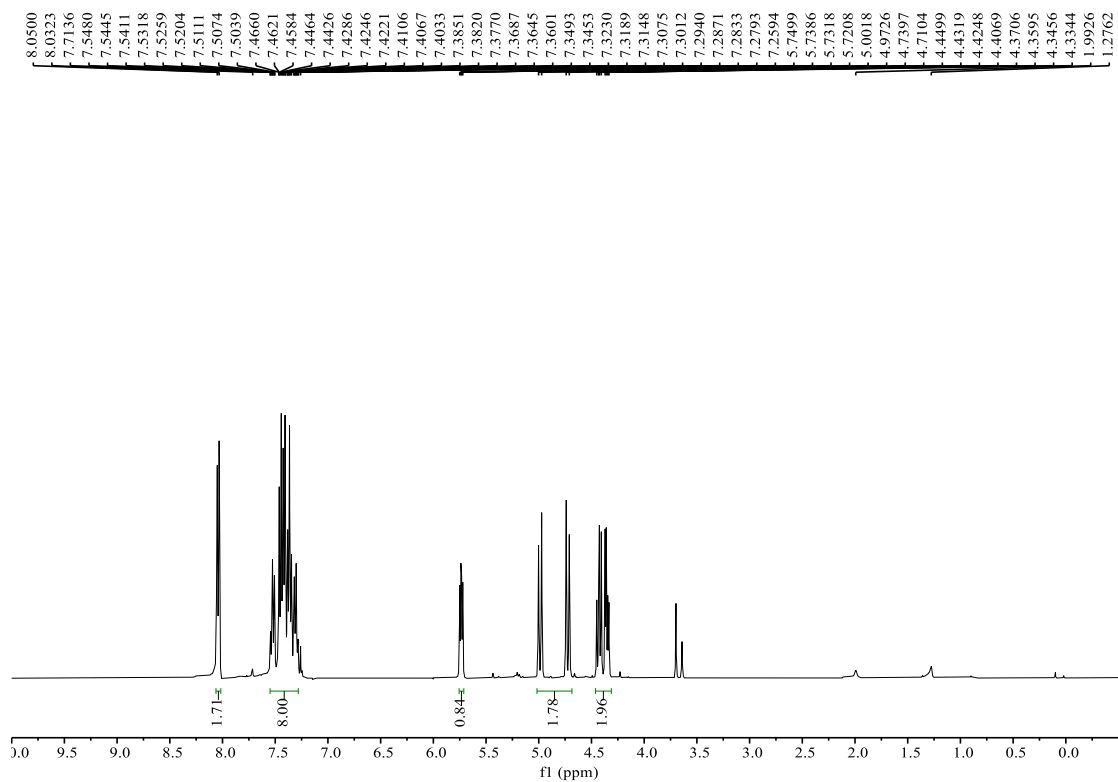

<sup>13</sup>C NMR (151 MHz, CDCl<sub>3</sub>) of compound 4e

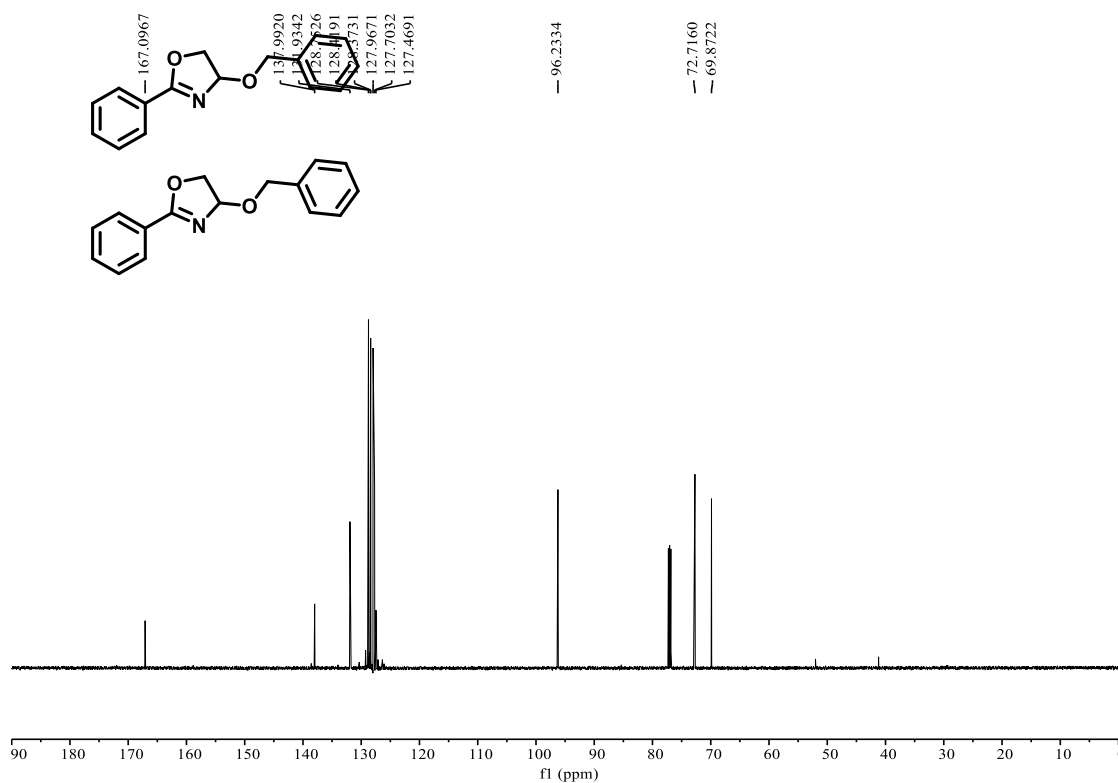



<sup>1</sup>H NMR (400 MHz, CDCl<sub>3</sub>) of compound **4f**

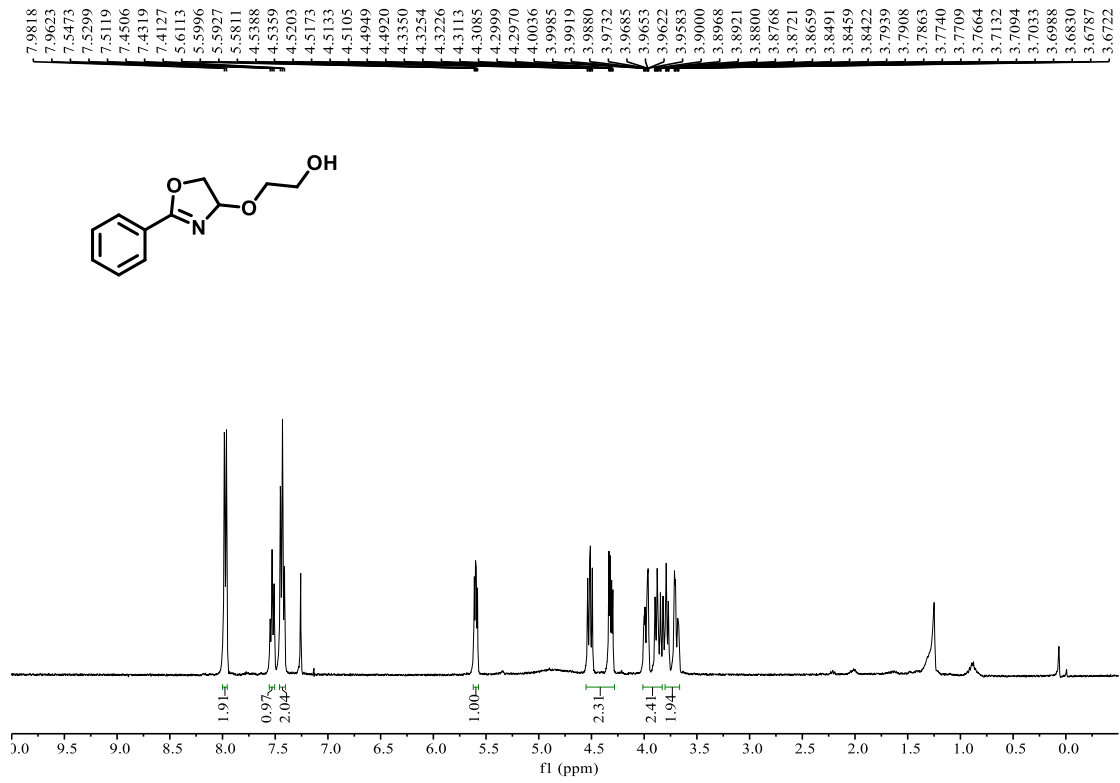

<sup>13</sup>C NMR (151 MHz, CDCl<sub>3</sub>) of compound **4f**

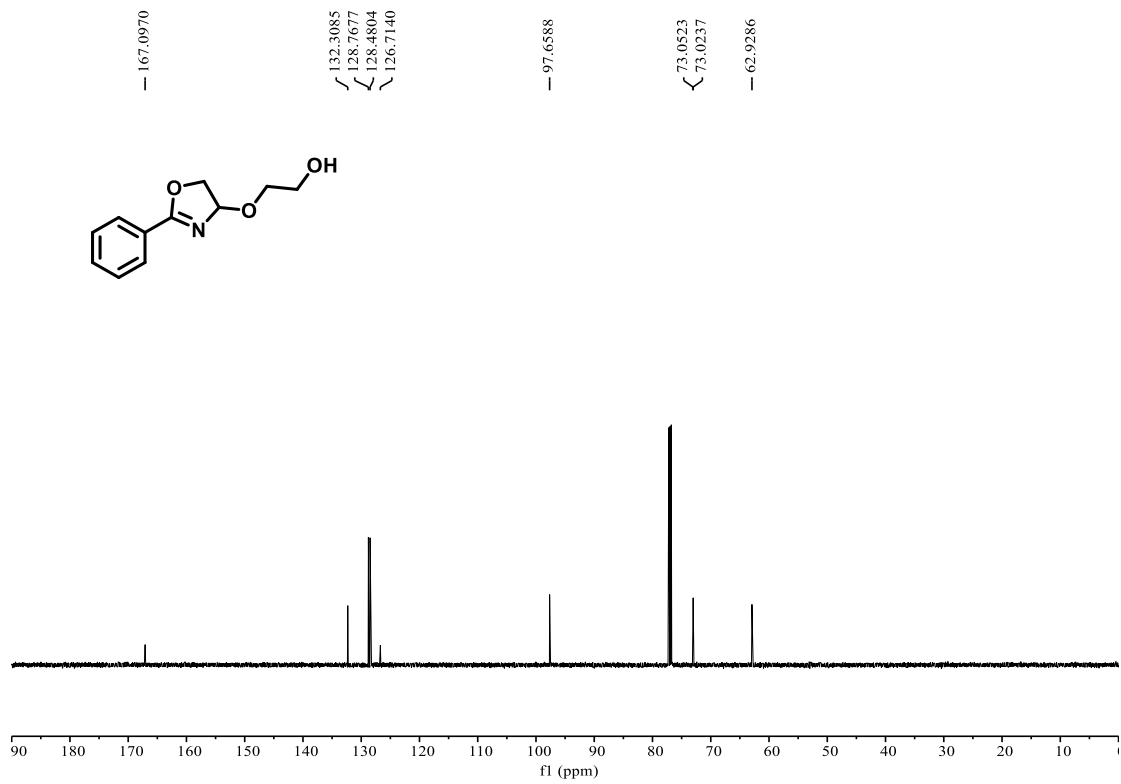

<sup>1</sup>H NMR (400 MHz, CDCl<sub>3</sub>) of compound **4g**

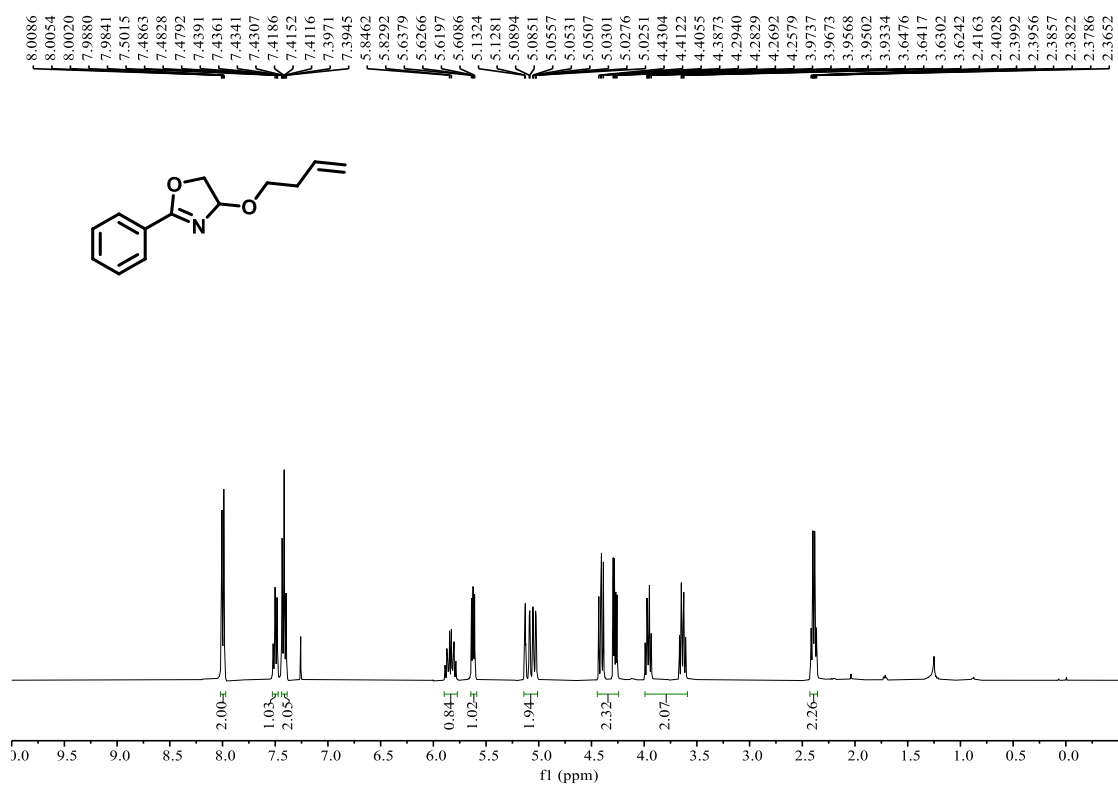

<sup>13</sup>C NMR (151 MHz, CDCl<sub>3</sub>) of compound **4g**

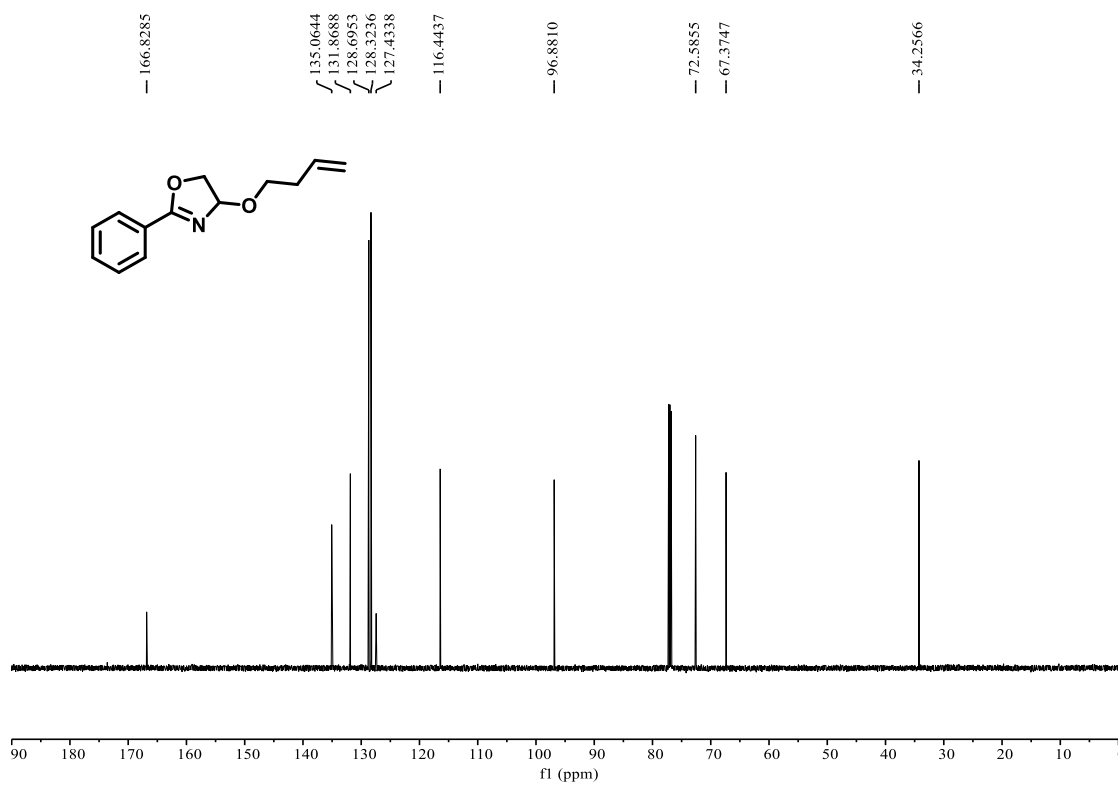

<sup>1</sup>H NMR (400 MHz, CDCl<sub>3</sub>) of compound **4h**

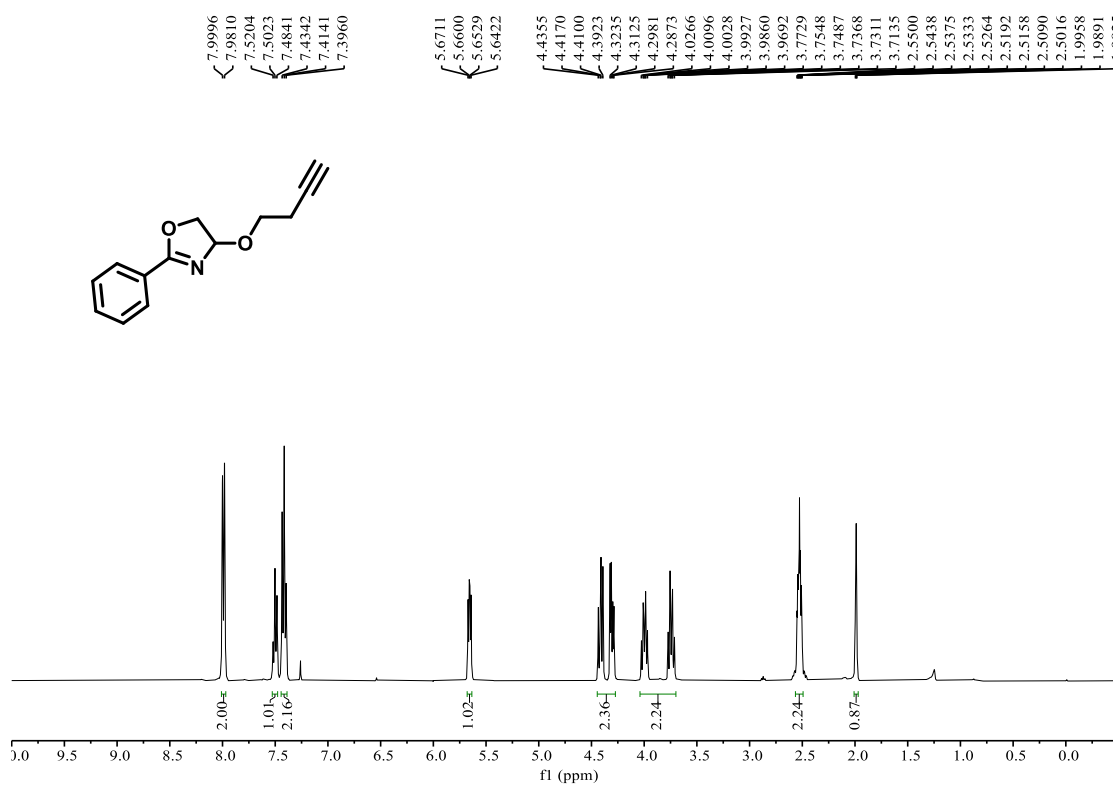

<sup>13</sup>C NMR (151 MHz, CDCl<sub>3</sub>) of compound **4h**

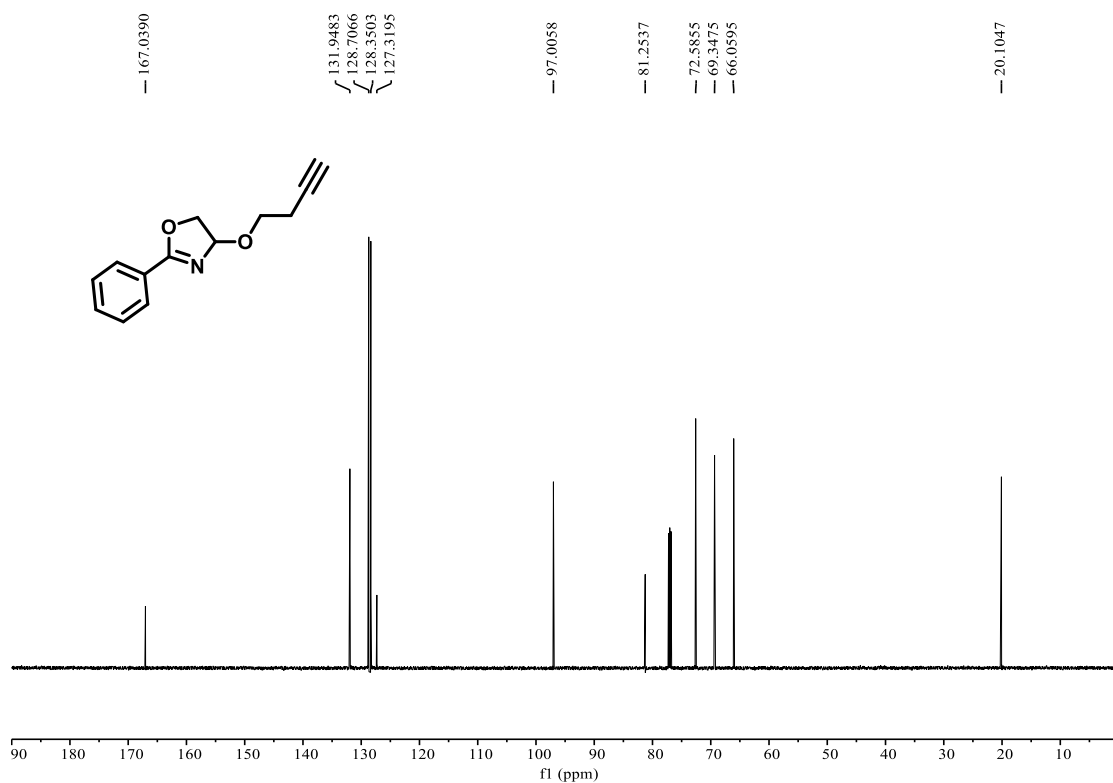

<sup>1</sup>H NMR (400 MHz, CDCl<sub>3</sub>) of compound **4i**

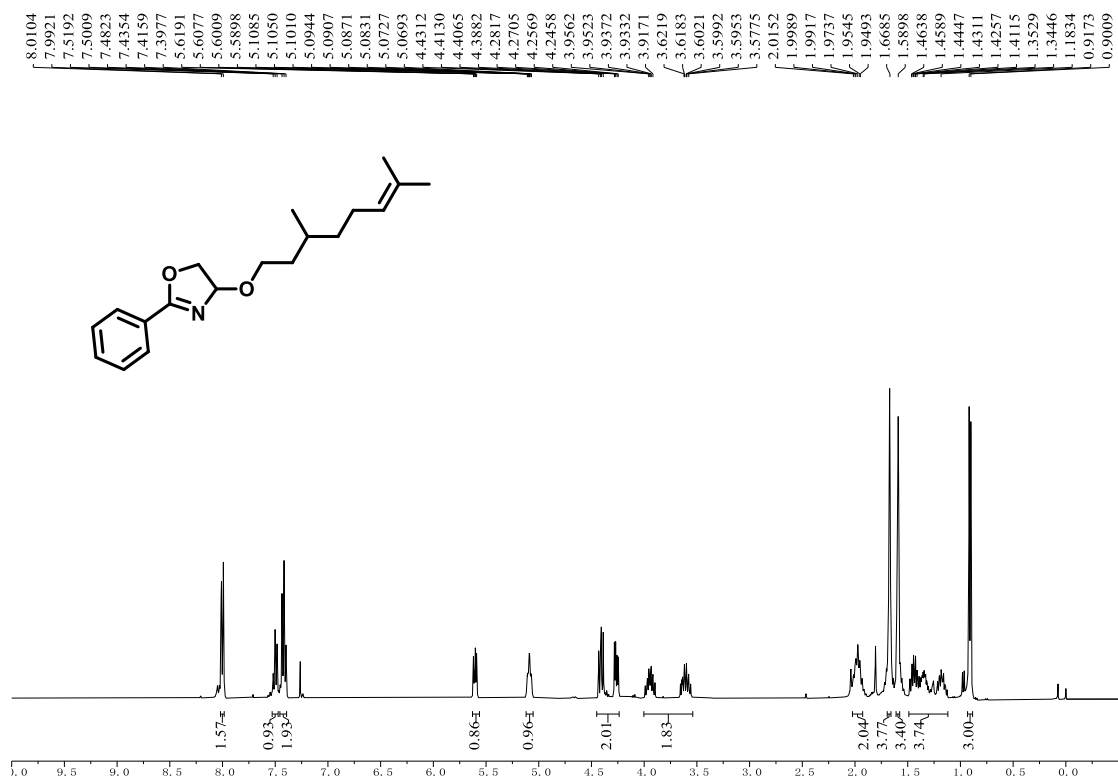

<sup>13</sup>C NMR (151 MHz, CDCl<sub>3</sub>) of compound **4i**

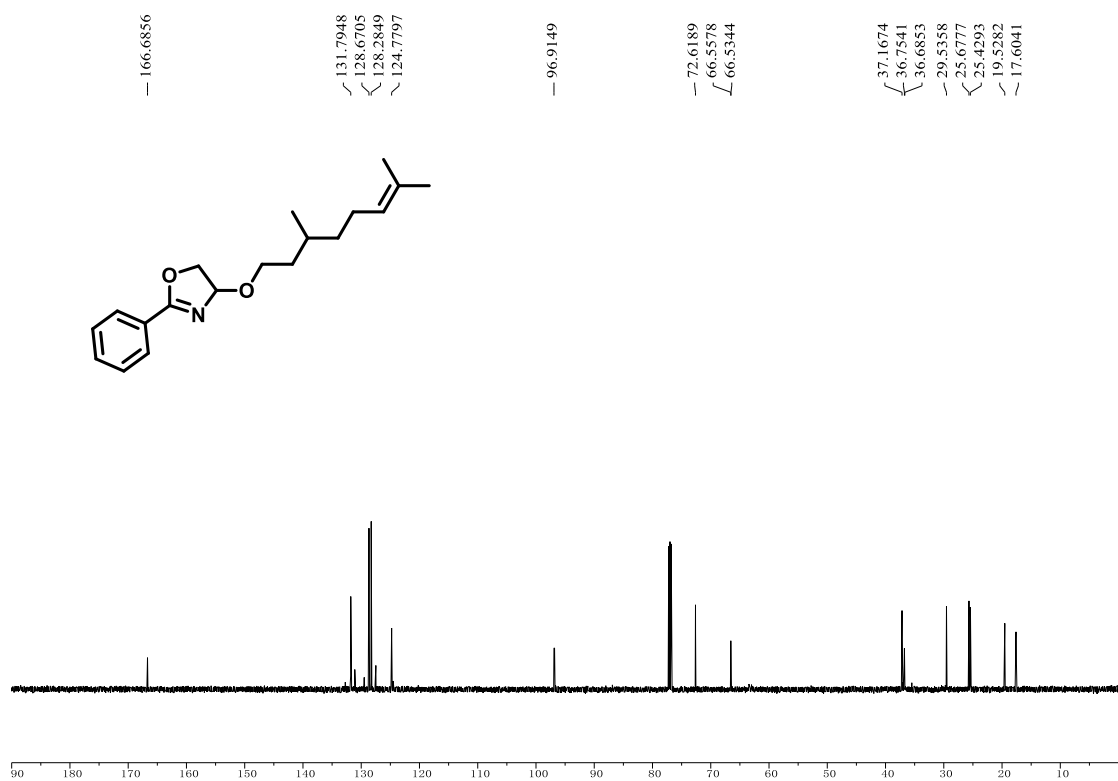

<sup>1</sup>H NMR (400 MHz, CDCl<sub>3</sub>) of compound **4j**

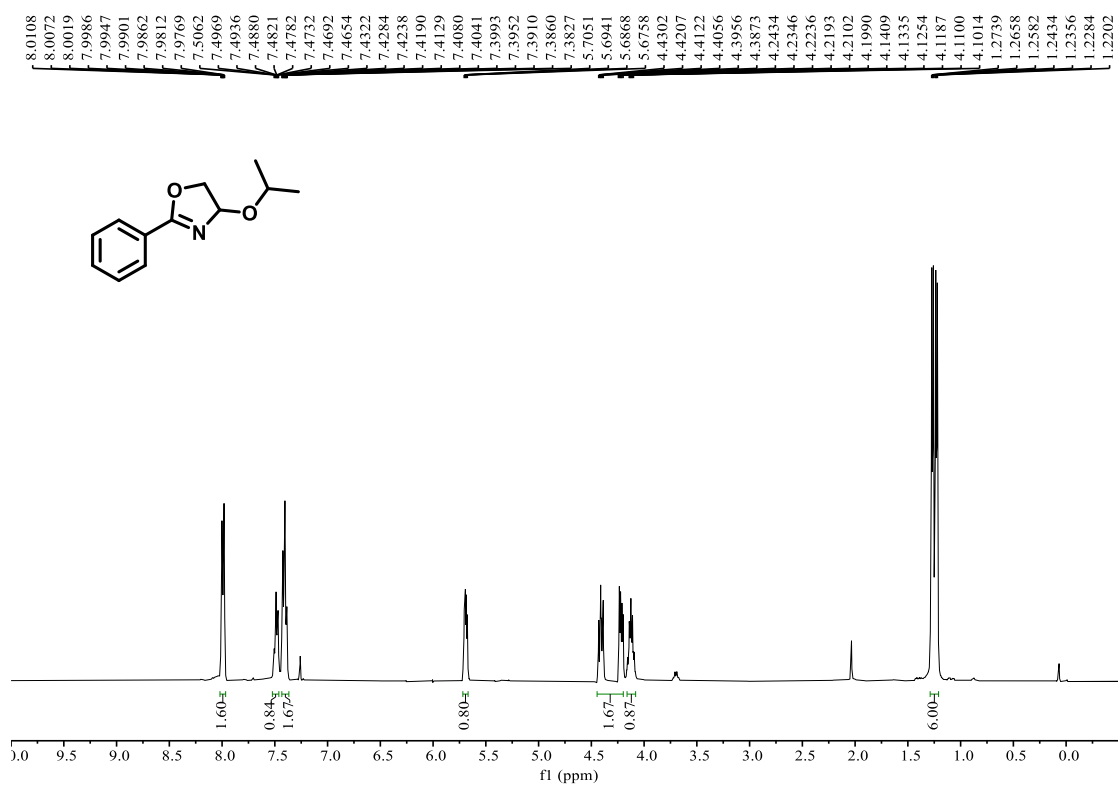

<sup>13</sup>C NMR (151 MHz, CDCl<sub>3</sub>) of compound **4j**

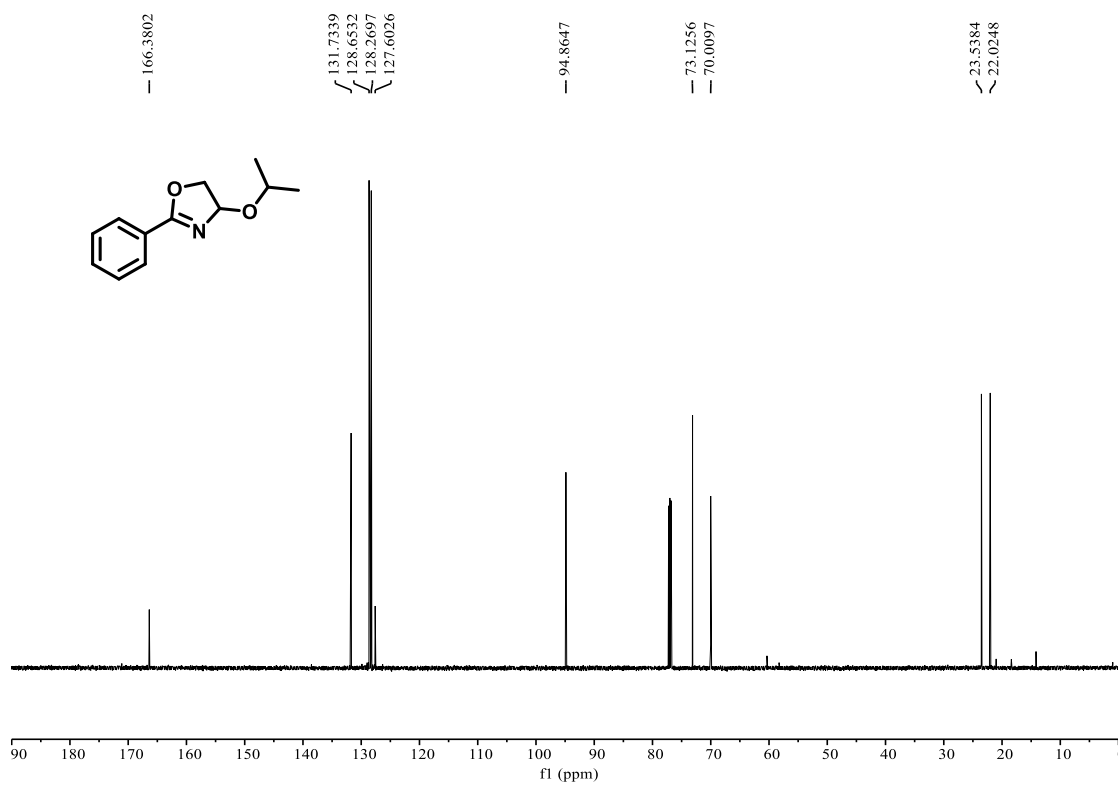

### <sup>1</sup>H NMR (400 MHz, CDCl<sub>3</sub>) of compound 4k

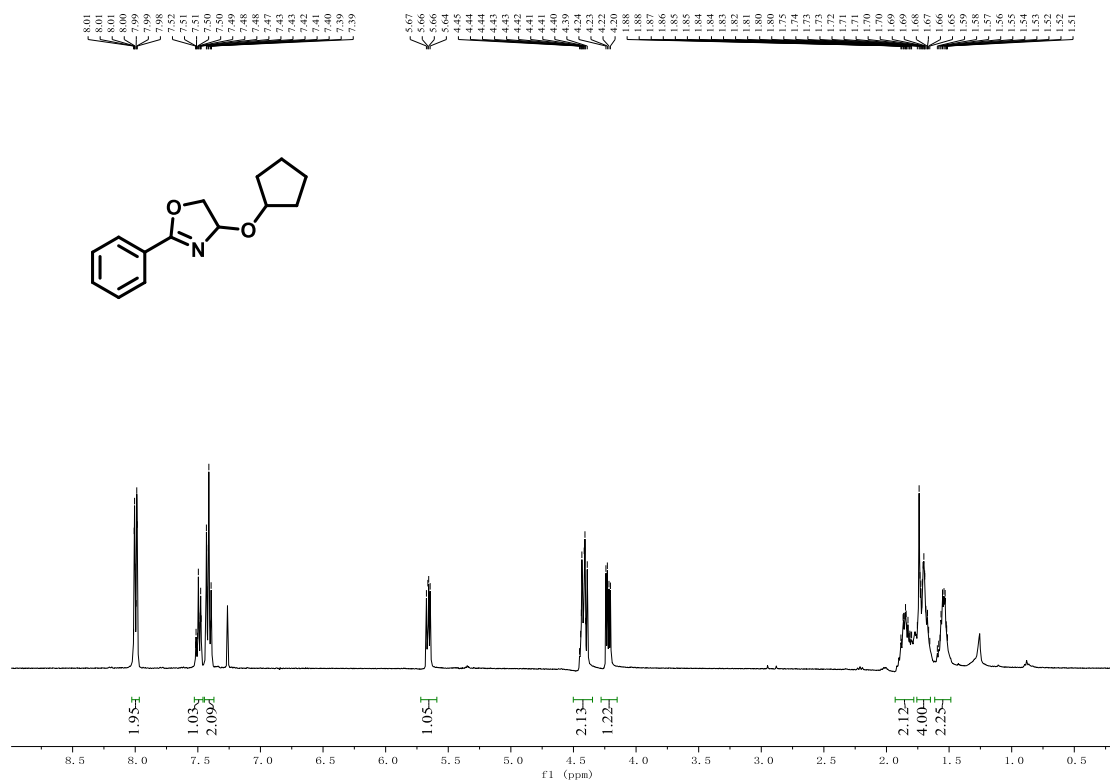

### <sup>13</sup>C NMR (151 MHz, CDCl<sub>3</sub>) of compound 4k

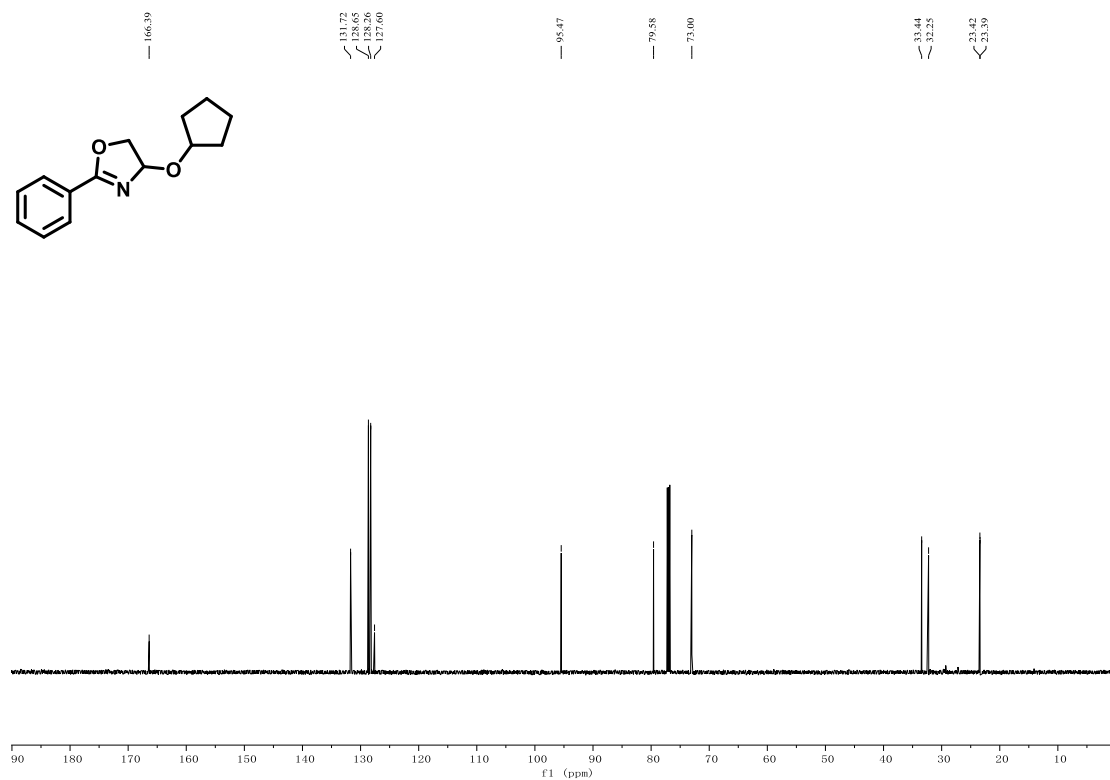

<sup>1</sup>H NMR (400 MHz, CDCl<sub>3</sub>) of compound **4l**

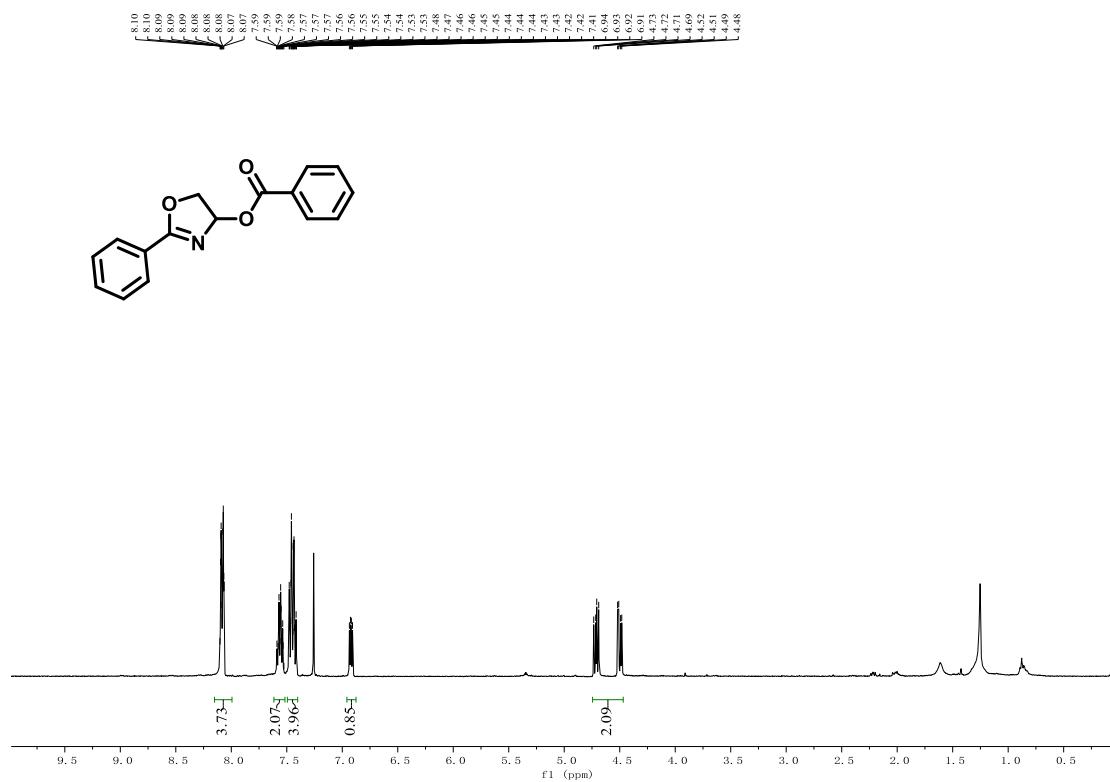

<sup>13</sup>C NMR (151 MHz, CDCl<sub>3</sub>) of compound **4l**

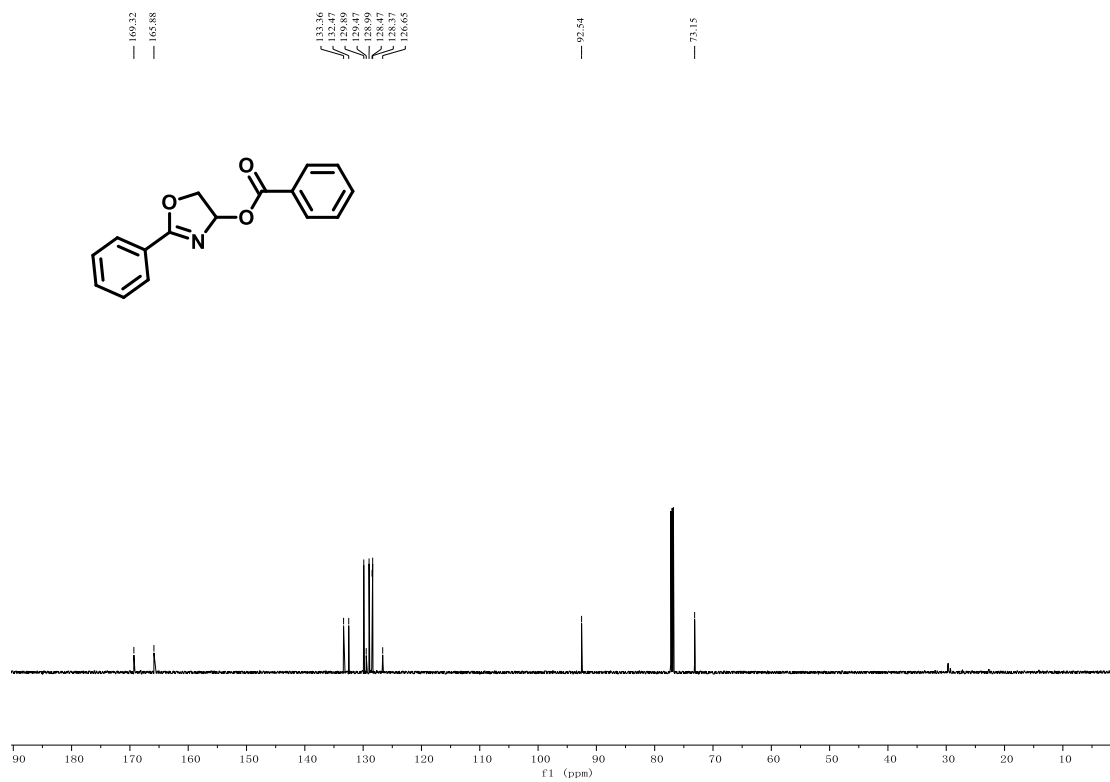

<sup>1</sup>H NMR (400 MHz, CDCl<sub>3</sub>) of compound **4m**

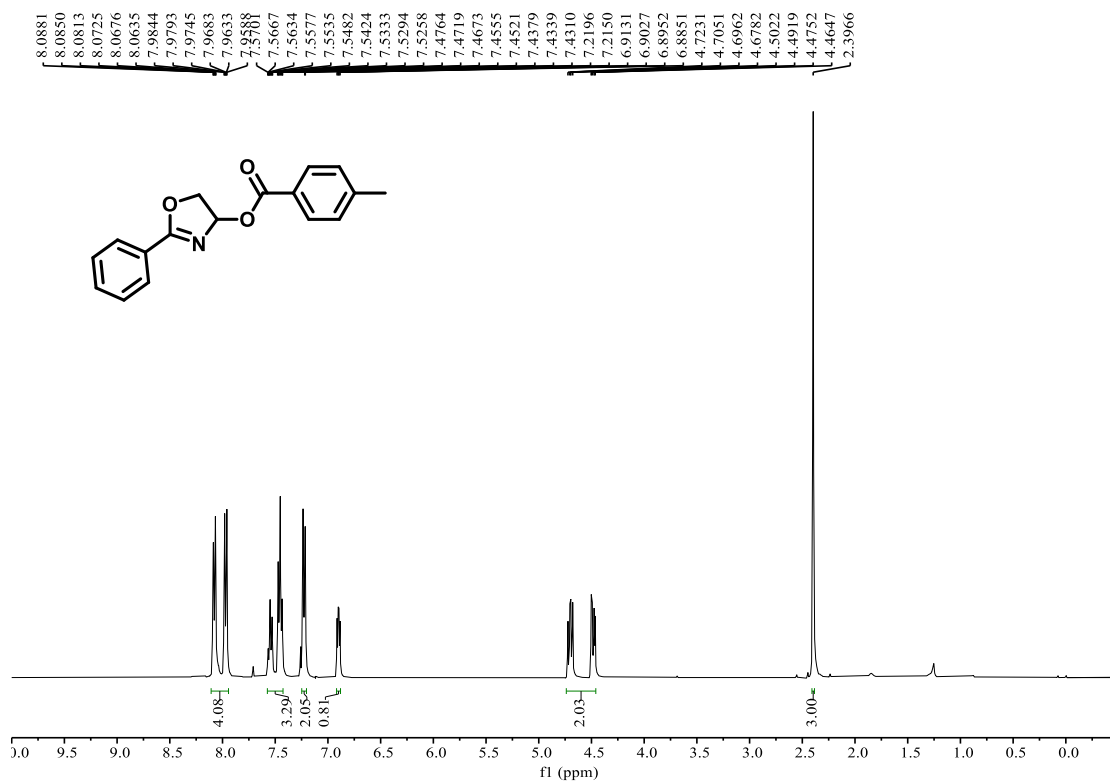

<sup>13</sup>C NMR (151 MHz, CDCl<sub>3</sub>) of compound **4m**

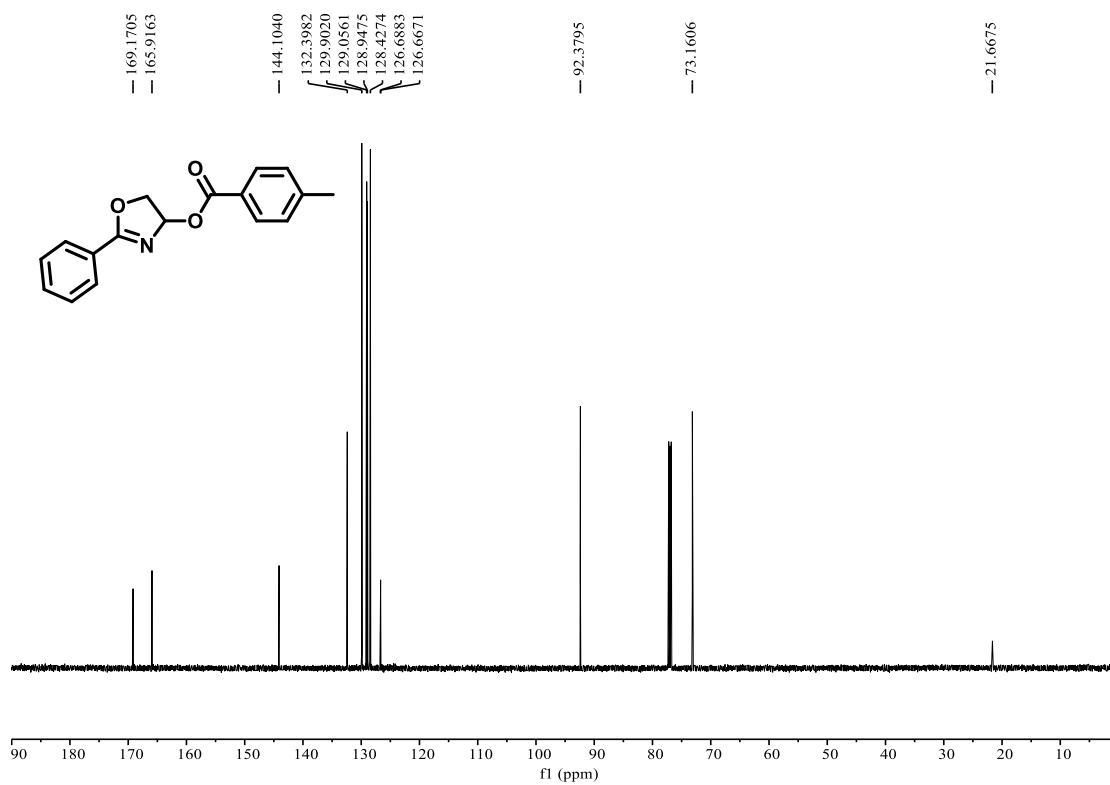



<sup>1</sup>H NMR (400 MHz, CDCl<sub>3</sub>) of compound **4n**

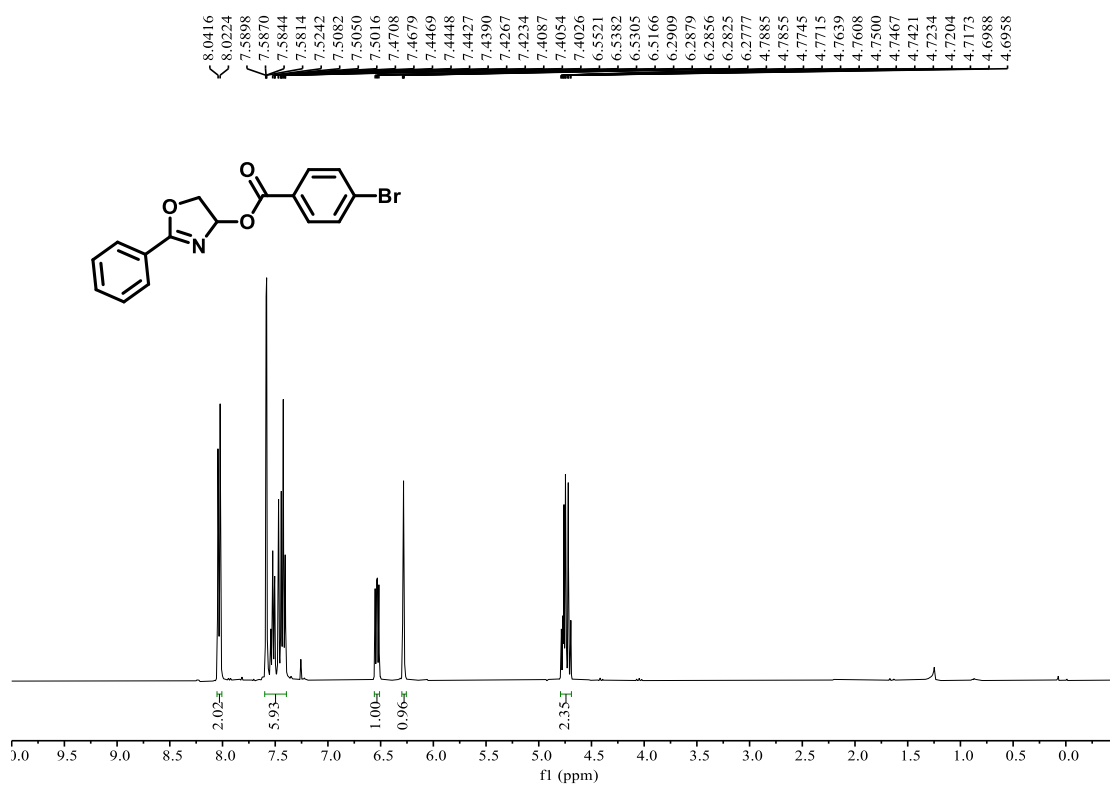

<sup>13</sup>C NMR (151 MHz, CDCl<sub>3</sub>) of compound **4n**

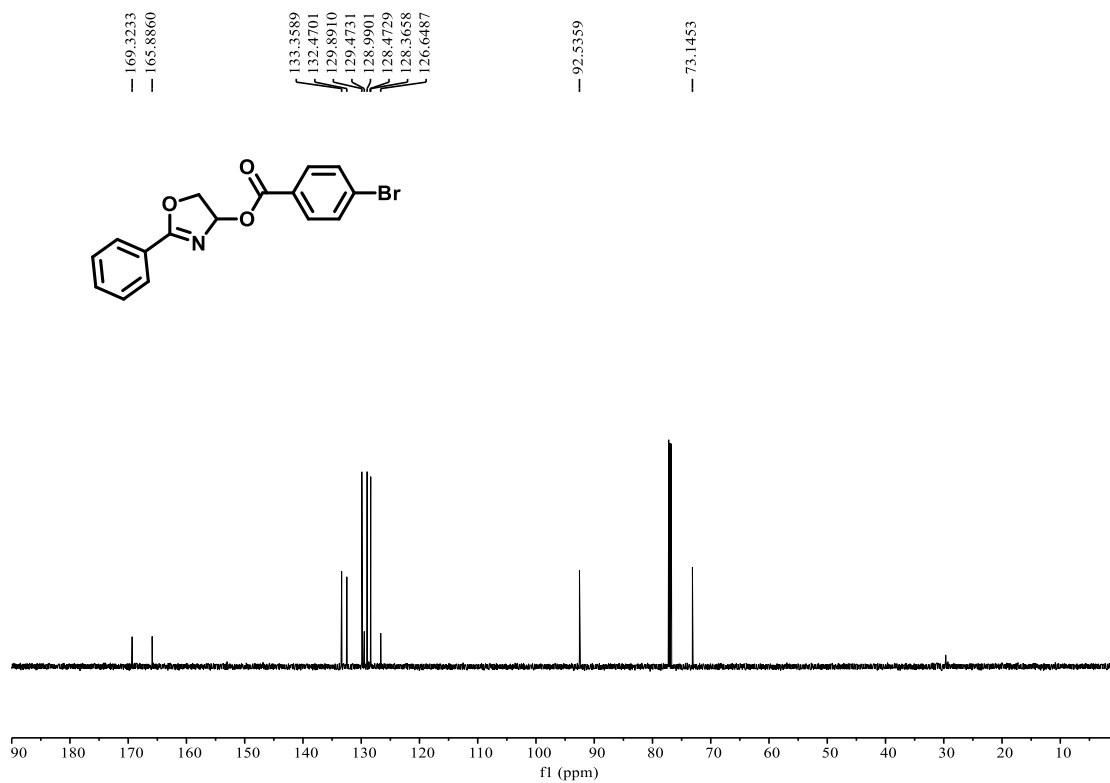

<sup>1</sup>H NMR (400 MHz, CDCl<sub>3</sub>) of compound **4o**

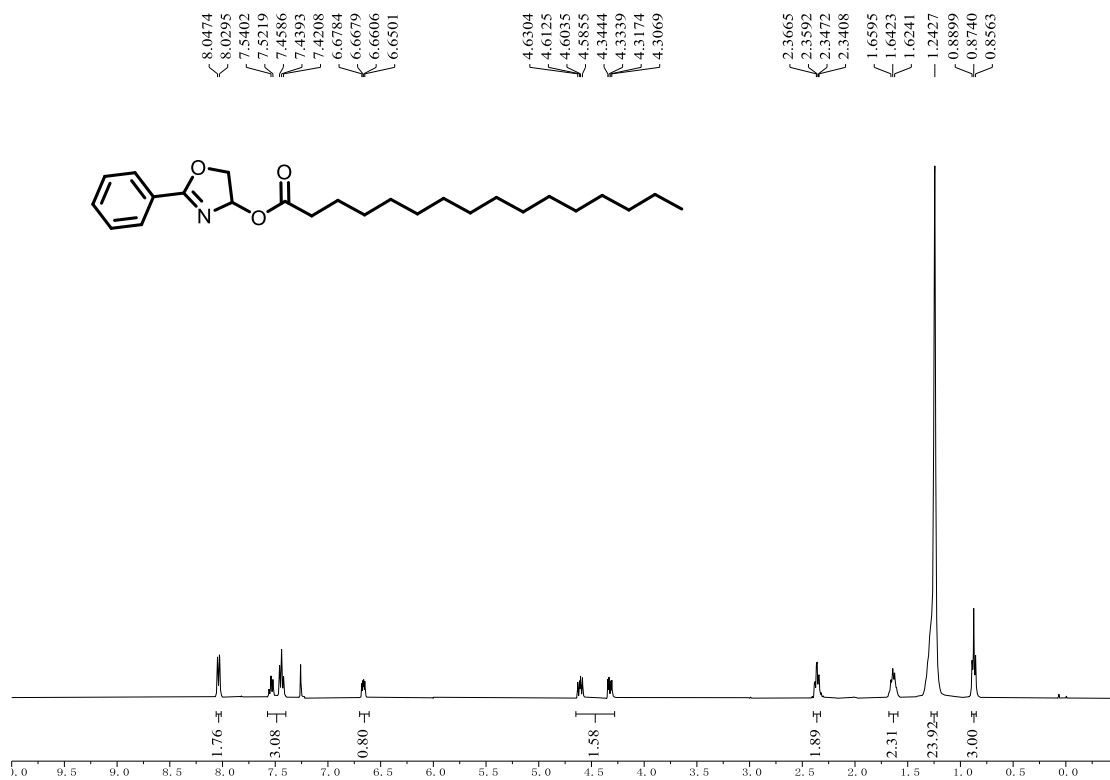

<sup>13</sup>C NMR (151 MHz, CDCl<sub>3</sub>) of compound **4o**

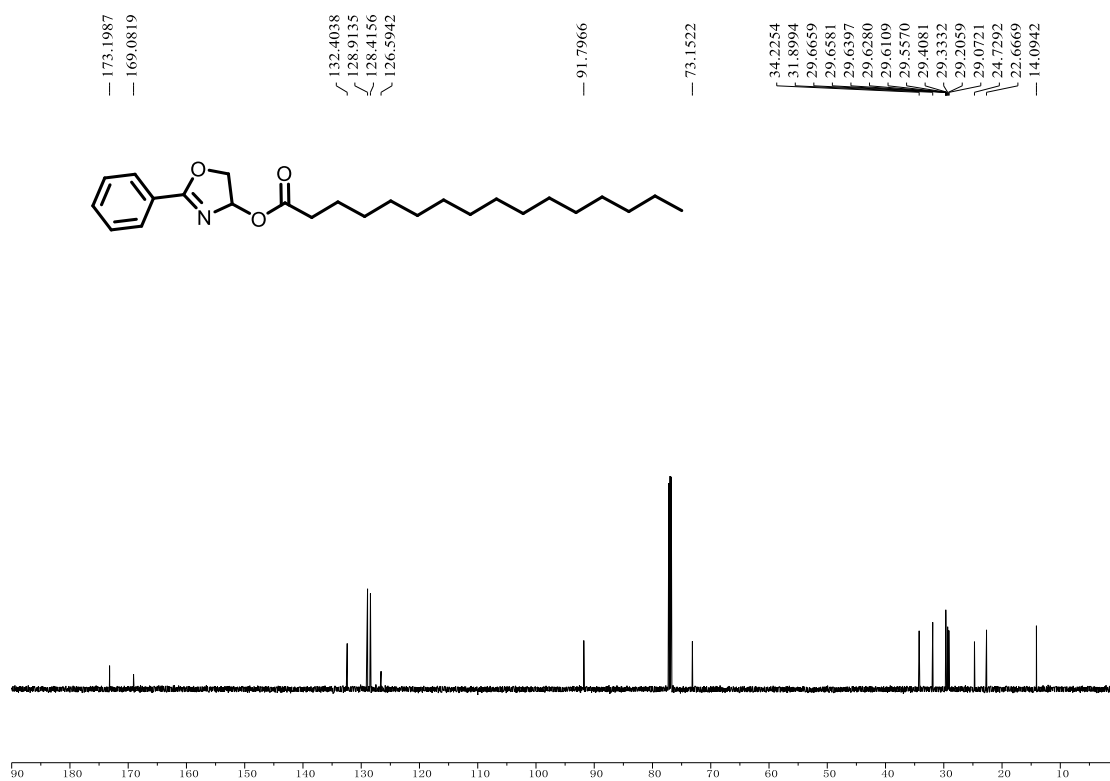

<sup>1</sup>H NMR (400 MHz, CDCl<sub>3</sub>) of compound **2y**

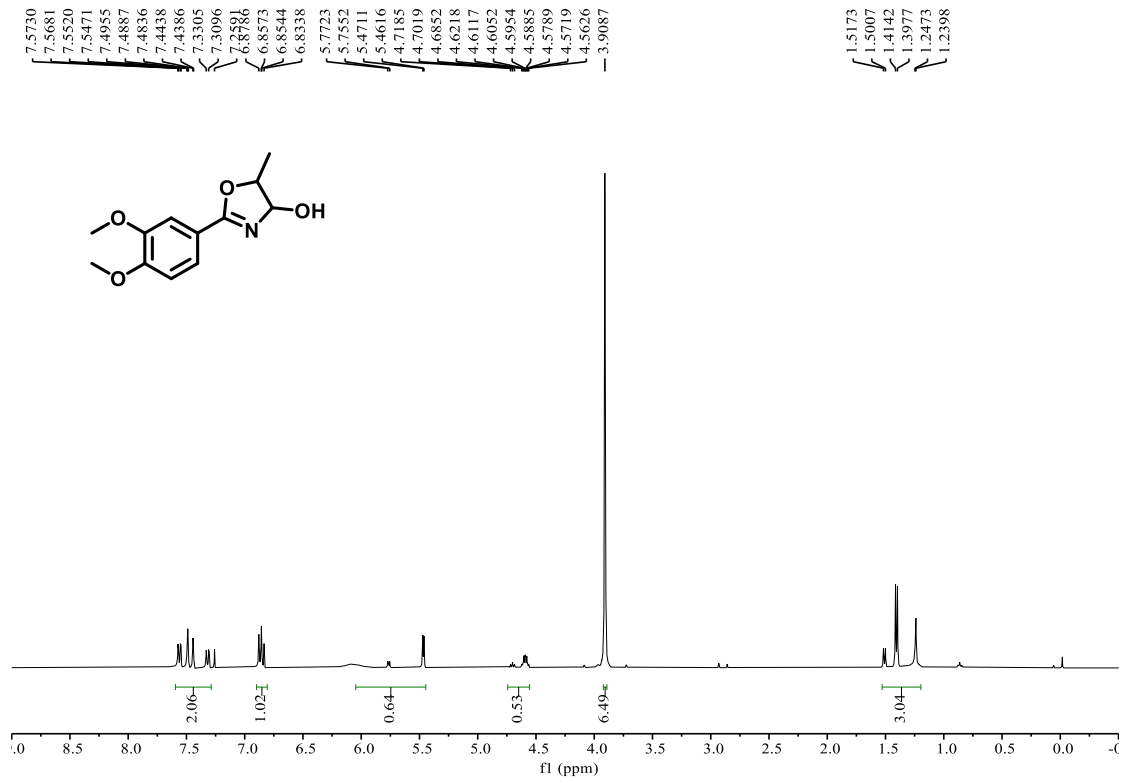

<sup>13</sup>C NMR (151 MHz, CDCl<sub>3</sub>) of compound **2y**

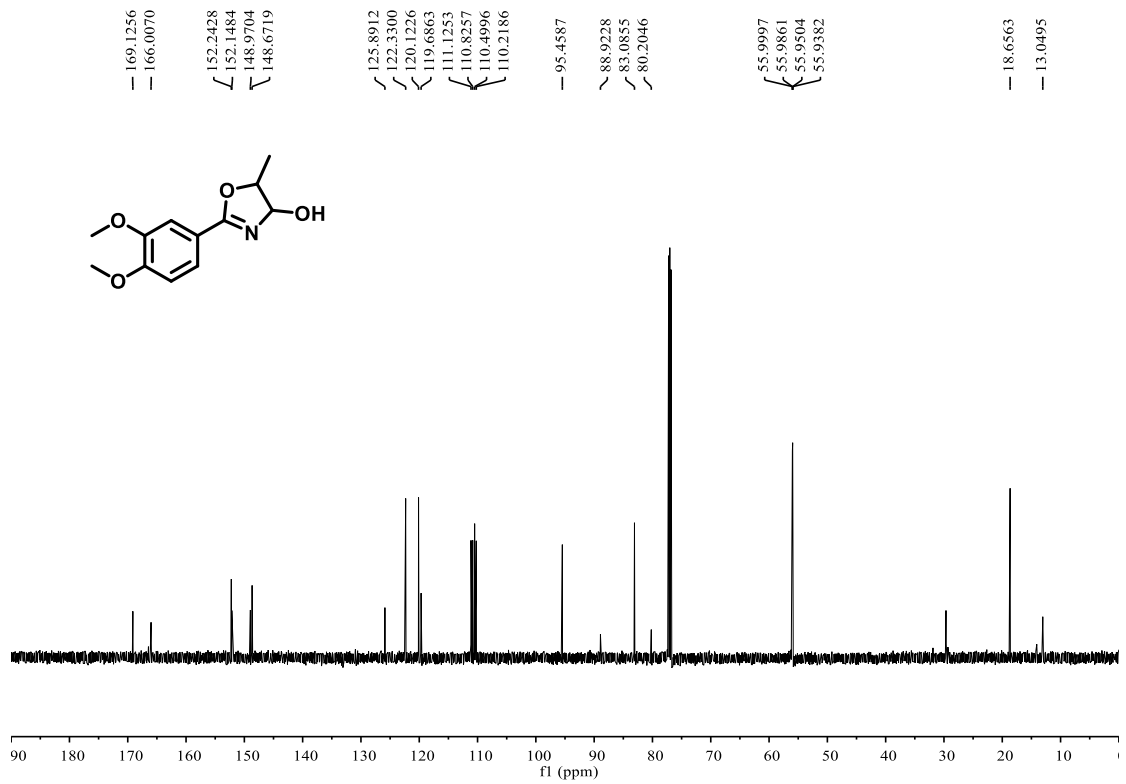

Supplement: d4gc05119j1.pdf [file d4gc05119j1.pdf]
